# Supplementary material for: SARS-CoV-2 Infection Remodels the Phenotype and Promotes Angiogenesis of Primary Human Lung Endothelial Cells
Source: Microorganisms. 2021 Jul 3;9(7):1438. doi: 10.3390/microorganisms9071438 (PMC8305478; doi:10.3390/microorganisms9071438)
Supplement: Supplementary file 1 [file microorganisms-09-01438-s001.zip]

Archive with 4 entries (4 files):
- Supplementary Figures.pdf
- Table S1.xlsx
- Table S2 .xlsx
- TableS3.xls
