# Supplementary material for: SARS-CoV-2 Infection Remodels the Phenotype and Promotes Angiogenesis of Primary Human Lung Endothelial Cells
Source: Microorganisms. 2021 Jul 3;9(7):1438. doi: 10.3390/microorganisms9071438 (PMC8305478; doi:10.3390/microorganisms9071438)
Supplement: Supplementary file 1 [file microorganisms-09-01438-s001.zip › Table S1.xlsx]

## Sheet: Table S1
Uniprot Accession	Gene name	Reference	Mock						SARS-CoV-2						UV-SARS-CoV-2						Total
			day 1		day 2		day 3		day 1		day 2		day 3		day 1		day 2		day 3		Overall Frequency	Overall Frequency on 9 Groups
			Frequency	aPSM	Frequency	aPSM	Frequency	aPSM	Frequency	aPSM	Frequency	aPSM	Frequency	aPSM	Frequency	aPSM	Frequency	aPSM	Frequency	aPSM
P49588	AARS1	Alanine--tRNA ligase, cytoplasmic	0	0	1	0.2	0	0	0	0	0	0	0	0	0	0	0	0	0	0	1	1
Q9NRN7	AASDHPPT	L-aminoadipate-semialdehyde dehydrogenase-phosphopantetheinyl transferase	0	0	0	0	1	0.2	0	0	0	0	1	0.2	0	0	0	0	1	0.2	3	3
Q99758	ABCA3	ATP-binding cassette sub-family A member 3	1	0.2	0	0	0	0	0	0	0	0	0	0	1	0.4	0	0	0	0	2	2
P78363	ABCA4	Retinal-specific phospholipid-transporting ATPase ABCA4	0	0	0	0	0	0	0	0	1	0.2	0	0	0	0	0	0	0	0	1	1
Q8WWZ7	ABCA5	ATP-binding cassette sub-family A member 5	1	0.2	0	0	0	0	0	0	0	0	0	0	0	0	0	0	0	0	1	1
A0A5F9ZA98	ABCB7	ATP-binding cassette sub-family B member 7, mitochondrial	0	0	1	0.2	0	0	0	0	0	0	0	0	1	0.2	0	0	0	0	2	2
Q8NE71	ABCF1	ATP-binding cassette sub-family F member 1	0	0	1	0.2	1	0.2	0	0	0	0	0	0	0	0	0	0	0	0	2	2
P00519	ABL1	Tyrosine-protein kinase ABL1	1	0.2	0	0	0	0	0	0	0	0	0	0	0	0	0	0	0	0	1	1
Q6UWZ7	ABRAXAS1	BRCA1-A complex subunit Abraxas 1	0	0	0	0	0	0	1	0.2	0	0	0	0	0	0	0	0	0	0	1	1
P09110	ACAA1	3-ketoacyl-CoA thiolase, peroxisomal	0	0	0	0	0	0	0	0	0	0	1	0.2	0	0	0	0	0	0	1	1
Q9H845	ACAD9	Complex I assembly factor ACAD9, mitochondrial	0	0	0	0	0	0	0	0	0	0	0	0	0	0	0	0	1	0.4	1	1
Q5T4U5	ACADM	Acyl-Coenzyme A dehydrogenase, C-4 to C-12 straight chain, isoform CRA_a	0	0	0	0	0	0	0	0	0	0	2	0.8	0	0	1	0.4	0	0	3	2
A0A5F9ZHL1	ACAT1	Acetyl-CoA acetyltransferase, mitochondrial	0	0	0	0	1	0.2	2	0.4	2	0.4	0	0	0	0	0	0	1	0.2	6	4
J3KS28	ACE	Angiotensin-converting enzyme (Fragment)	0	0	1	0.2	0	0	0	0	0	0	0	0	0	0	0	0	0	0	1	1
P53396	ACLY	ATP-citrate synthase	1	0.4	1	0.8	3	1.6	3	2.8	1	0.4	1	0.8	5	2.8	5	4.8	1	1.2	21	9
P21399	ACO1	Cytoplasmic aconitate hydratase	1	0.2	0	0	0	0	0	0	0	0	0	0	0	0	0	0	0	0	1	1
A2A274	ACO2	Aconitate hydratase, mitochondrial	4	1.2	3	0.8	2	0.6	0	0	3	0.8	1	0.2	3	0.6	2	0.6	1	0.2	19	8
Q9NPJ3	ACOT13	Acyl-coenzyme A thioesterase 13	0	0	0	0	0	0	0	0	1	0.2	0	0	0	0	0	0	0	0	1	1
Q9Y305	ACOT9	Acyl-coenzyme A thioesterase 9, mitochondrial	0	0	0	0	0	0	0	0	1	0.2	0	0	0	0	0	0	0	0	1	1
Q9ULC5	ACSL5	Long-chain-fatty-acid--CoA ligase 5	0	0	0	0	0	0	0	0	0	0	0	0	0	0	0	0	1	0.2	1	1
P60709	ACTB	Actin, cytoplasmic 1	5	92.8	5	92.2	5	102.8	5	81.4	5	92	5	93.4	5	82.6	5	85.4	5	89.8	45	9
Q562R1	ACTBL2	Beta-actin-like protein 2	5	7.2	5	8.2	5	6.8	5	7.2	5	6.2	5	8.2	5	6.6	5	7.2	5	7	45	9
P68032	ACTC1	Actin, alpha cardiac muscle 1	5	28.2	5	23	5	24.2	5	22.8	5	23.8	5	29.2	5	20.6	5	22.4	5	25.4	45	9
O94805	ACTL6B	Actin-like protein 6B	0	0	0	0	0	0	0	0	0	0	0	0	1	0.2	0	0	0	0	1	1
P12814	ACTN1	Alpha-actinin-1	5	14.4	5	14	5	10.4	5	12	5	15	5	14.8	5	12.8	5	11.2	5	16.6	45	9
O43707	ACTN4	Alpha-actinin-4	5	8.4	5	8	5	12.4	5	7.2	5	9.6	5	9.2	5	9	5	8	5	13.4	45	9
P61163	ACTR1A	Alpha-centractin	1	0.2	0	0	0	0	0	0	0	0	0	0	0	0	1	0.2	0	0	2	2
P61160	ACTR2	Actin-related protein 2	0	0	2	0.8	3	1	1	0.4	2	0.6	3	1.4	2	0.6	2	0.8	0	0	15	7
P61158	ACTR3	Actin-related protein 3	0	0	0	0	0	0	0	0	2	0.4	2	0.4	0	0	1	0.2	0	0	5	3
Q8NER5	ACVR1C	Activin receptor type-1C	0	0	0	0	0	0	0	0	0	0	0	0	1	0.2	0	0	0	0	1	1
P27037	ACVR2A	Activin receptor type-2A	2	0.6	0	0	1	0.4	0	0	3	0.8	2	1.2	2	0.4	0	0	3	0.8	13	6
Q13705	ACVR2B	Activin receptor type-2B	0	0	0	0	1	0.2	0	0	0	0	0	0	0	0	0	0	0	0	1	1
Q9NZK5	ADA2	Adenosine deaminase 2	0	0	0	0	0	0	0	0	0	0	0	0	1	0.2	0	0	1	0.2	2	2
Q99965	ADAM2	Disintegrin and metalloproteinase domain-containing protein 2	0	0	0	0	0	0	0	0	1	0.2	0	0	0	0	0	0	0	0	1	1
Q9P0K1	ADAM22	Disintegrin and metalloproteinase domain-containing protein 22	0	0	0	0	0	0	0	0	0	0	0	0	1	0.2	0	0	0	0	1	1
D6RBU0	ADAM29	Disintegrin and metalloproteinase domain-containing protein 29 (Fragment)	0	0	0	0	0	0	0	0	0	0	0	0	1	0.2	0	0	0	0	1	1
Q8TC27	ADAM32	Disintegrin and metalloproteinase domain-containing protein 32	0	0	0	0	0	0	0	0	1	0.2	0	0	0	0	0	0	0	0	1	1
Q13443	ADAM9	Disintegrin and metalloproteinase domain-containing protein 9	0	0	0	0	0	0	0	0	1	0.2	0	0	0	0	0	0	0	0	1	1
O15204	ADAMDEC1	ADAM DEC1	1	0.2	0	0	0	0	0	0	0	0	0	0	0	0	0	0	0	0	1	1
Q8TE56	ADAMTS17	A disintegrin and metalloproteinase with thrombospondin motifs 17	0	0	0	0	0	0	0	0	0	0	1	0.2	0	0	0	0	0	0	1	1
Q6UY14	ADAMTSL4	ADAMTS-like protein 4	0	0	0	0	0	0	0	0	0	0	1	0.2	0	0	0	0	0	0	1	1
Q8IWK6	ADGRA3	Adhesion G protein-coupled receptor A3	0	0	0	0	1	0.2	0	0	0	0	0	0	0	0	0	0	0	0	1	1
S4R307	ADGRB3	Adhesion G protein-coupled receptor B3 (Fragment)	0	0	0	0	0	0	0	0	0	0	0	0	0	0	1	0.2	0	0	1	1
Q9Y653	ADGRG1	Adhesion G-protein coupled receptor G1	0	0	0	0	0	0	0	0	0	0	0	0	1	0.2	0	0	0	0	1	1
E7EUW2	ADGRL3	Adhesion G protein-coupled receptor L3	1	0.2	0	0	0	0	0	0	0	0	0	0	0	0	0	0	0	0	1	1
Q8WXG9	ADGRV1	Adhesion G-protein coupled receptor V1	0	0	0	0	0	0	0	0	0	0	0	0	0	0	0	0	1	0.2	1	1
P00325	ADH1B	All-trans-retinol dehydrogenase [NAD(+)] ADH1B	0	0	0	0	0	0	1	0.2	0	0	0	0	0	0	0	0	0	0	1	1
P11766	ADH5	Alcohol dehydrogenase class-3	1	0.4	0	0	0	0	0	0	0	0	0	0	0	0	0	0	0	0	1	1
Q86V24	ADIPOR2	Adiponectin receptor protein 2	0	0	0	0	1	0.2	0	0	0	0	0	0	0	0	1	0.2	0	0	2	2
Q16186	ADRM1	Proteasomal ubiquitin receptor ADRM1	3	0.8	5	2	2	0.4	4	1.4	5	1.6	5	1	5	1.8	5	2	2	0.6	36	9
Q8NEM8	AGBL3	Cytosolic carboxypeptidase 3	0	0	0	0	0	0	0	0	0	0	0	0	0	0	1	0.2	0	0	1	1
P23526	AHCY	Adenosylhomocysteinase	1	0.4	0	0	2	0.8	0	0	0	0	0	0	0	0	0	0	2	1.2	5	3
Q8N157	AHI1	Jouberin	0	0	0	0	0	0	0	0	0	0	1	0.2	0	0	0	0	0	0	1	1
Q09666	AHNAK	Neuroblast differentiation-associated protein AHNAK	5	18.2	5	18.6	5	25.6	5	19.6	5	27	5	18.8	5	24.4	5	19.4	5	21.8	45	9
P02765	AHSG	Alpha-2-HS-glycoprotein	0	0	0	0	0	0	0	0	0	0	1	0.2	0	0	1	0.2	0	0	2	2
Q9UKB5	AJAP1	Adherens junction-associated protein 1	0	0	0	0	0	0	0	0	0	0	0	0	1	0.2	0	0	0	0	1	1
Q5T9B7	AK1	Adenylate kinase isoenzyme 1	1	0.4	2	0.6	2	0.8	2	0.6	2	1	2	1.2	2	0.8	2	1.2	2	1.2	17	9
Q02952	AKAP12	A-kinase anchor protein 12	5	5	2	1.6	3	2	5	4.8	4	2.4	3	2.4	5	5.6	4	3	3	2	34	9
Q02040	AKAP17A	A-kinase anchor protein 17A	0	0	0	0	0	0	0	0	0	0	0	0	0	0	1	0.2	0	0	1	1
A0A075B6Q6	AKAP4	A-kinase anchor protein 4 (Fragment)	0	0	0	0	0	0	0	0	0	0	0	0	1	0.2	0	0	0	0	1	1
Q13023	AKAP6	A-kinase anchor protein 6	0	0	0	0	0	0	0	0	0	0	0	0	0	0	1	0.2	0	0	1	1
O43823	AKAP8	A-kinase anchor protein 8	0	0	1	0.2	1	0.2	0	0	0	0	0	0	0	0	0	0	1	0.2	3	3
A0A0A0MRF6	AKAP9	A-kinase anchor protein 9	1	0.2	0	0	0	0	0	0	0	0	0	0	0	0	0	0	0	0	1	1
P14550	AKR1A1	Aldo-keto reductase family 1 member A1	0	0	0	0	0	0	1	0.2	0	0	1	0.2	0	0	0	0	0	0	2	2
P15121	AKR1B1	Aldo-keto reductase family 1 member B1	1	0.4	4	2.2	1	0.4	2	1.6	4	2	1	0.8	5	2.8	3	1.2	5	2.2	26	9
A0A0A0MSS8	AKR1C3	Aldo-keto reductase family 1 member C3	0	0	0	0	0	0	0	0	0	0	0	0	1	0.2	0	0	0	0	1	1
P17516	AKR1C4	Aldo-keto reductase family 1 member C4	0	0	0	0	0	0	0	0	0	0	0	0	1	0.2	0	0	0	0	1	1
P13196	ALAS1	5-aminolevulinate synthase, nonspecific, mitochondrial	0	0	0	0	0	0	1	0.2	0	0	0	0	0	0	0	0	0	0	1	1
P02768	ALB	Serum albumin	1	0.2	0	0	2	0.8	1	0.2	1	0.2	5	1.8	1	0.2	0	0	4	1.2	15	7
O75891	ALDH1L1	Cytosolic 10-formyltetrahydrofolate dehydrogenase	0	0	1	0.2	0	0	0	0	0	0	0	0	0	0	0	0	0	0	1	1
P04075	ALDOA	Fructose-bisphosphate aldolase A	5	7	5	6.4	5	7.4	5	7.4	5	5.4	5	9.8	5	5	5	5.4	5	5.6	45	9
Q9BT22	ALG1	Chitobiosyldiphosphodolichol beta-mannosyltransferase	0	0	0	0	0	0	1	0.2	0	0	0	0	0	0	0	0	0	0	1	1
Q15699	ALX1	ALX homeobox protein 1	0	0	1	0.2	0	0	0	0	0	0	0	0	0	0	0	0	0	0	1	1
E9PB61	ALYREF	THO complex subunit 4	0	0	0	0	0	0	1	0.2	0	0	0	0	0	0	0	0	0	0	1	1
Q9UHK6	AMACR	Alpha-methylacyl-CoA racemase	0	0	0	0	0	0	0	0	0	0	0	0	1	0.2	0	0	0	0	1	1
Q01433	AMPD2	AMP deaminase 2	0	0	0	0	0	0	0	0	0	0	0	0	0	0	0	0	1	0.2	1	1
Q12955	ANK3	Ankyrin-3	0	0	0	0	0	0	0	0	0	0	0	0	0	0	0	0	1	0.2	1	1
E7EWS1	ANKAR	Ankyrin and armadillo repeat-containing protein	1	0.2	0	0	0	0	0	0	0	0	0	0	0	0	0	0	0	0	1	1
Q495B1	ANKDD1A	Ankyrin repeat and death domain-containing protein 1A	0	0	0	0	0	0	0	0	0	0	0	0	0	0	0	0	1	0.2	1	1
Q8IWZ3	ANKHD1	Ankyrin repeat and KH domain-containing protein 1	0	0	0	0	1	0.2	0	0	0	0	0	0	0	0	0	0	1	0.2	2	2
Q9P2G1	ANKIB1	Ankyrin repeat and IBR domain-containing protein 1	0	0	0	0	0	0	0	0	0	0	0	0	0	0	0	0	1	0.4	1	1
J3KQ21	ANKMY1	Ankyrin repeat and MYND domain-containing protein 1	0	0	0	0	0	0	1	0.2	0	0	0	0	0	0	0	0	0	0	1	1
Q8IZ07	ANKRD13A	Ankyrin repeat domain-containing protein 13A	0	0	0	0	0	0	0	0	0	0	1	0.2	0	0	1	0.2	0	0	2	2
Q9H560	ANKRD19P	Putative ankyrin repeat domain-containing protein 19	1	0.2	0	0	0	0	0	0	0	0	0	0	0	0	0	0	0	0	1	1
A0A494C151	ANKRD20A1	Ankyrin repeat domain-containing protein 20A1 (Fragment)	0	0	0	0	1	0.2	0	0	0	0	1	0.2	0	0	0	0	0	0	2	2
Q8TF21	ANKRD24	Ankyrin repeat domain-containing protein 24	0	0	0	0	1	0.2	0	0	0	0	0	0	0	0	0	0	0	0	1	1
Q96NW4	ANKRD27	Ankyrin repeat domain-containing protein 27	0	0	0	0	0	0	0	0	0	0	0	0	1	0.2	0	0	0	0	1	1
Q8N283	ANKRD35	Ankyrin repeat domain-containing protein 35	0	0	0	0	0	0	0	0	0	0	0	0	0	0	0	0	1	0.2	1	1
A6QL64	ANKRD36	Ankyrin repeat domain-containing protein 36A	1	0.2	0	0	1	0.2	0	0	0	0	0	0	0	0	0	0	0	0	2	2
Q53RE8	ANKRD39	Ankyrin repeat domain-containing protein 39	0	0	0	0	1	0.2	0	0	0	0	0	0	0	0	0	0	0	0	1	1
E9PIL2	ANKRD42	Ankyrin repeat domain-containing protein 42	1	0.4	0	0	0	0	0	0	0	0	0	0	0	0	0	0	0	0	1	1
A0A3B3ISP1	ANKS1A	Ankyrin repeat and SAM domain-containing protein 1A	0	0	0	0	0	0	0	0	0	0	0	0	1	0.2	0	0	0	0	1	1
F6WF08	ANKS3	Ankyrin repeat and SAM domain-containing protein 3	0	0	0	0	0	0	0	0	0	0	0	0	1	0.2	0	0	0	0	1	1
A1A5B4	ANO9	Anoctamin-9	0	0	0	0	0	0	0	0	1	0.2	0	0	0	0	0	0	0	0	1	1
P39687	ANP32A	Acidic leucine-rich nuclear phosphoprotein 32 family member A	0	0	3	1.2	0	0	1	0.4	2	0.8	1	0.4	0	0	1	0.4	0	0	8	5
P15144	ANPEP	Aminopeptidase N	5	2.8	3	1.8	5	2.4	4	2	4	2	5	3	1	0.8	5	2.4	5	4	37	9
P04083	ANXA1	Annexin A1	5	7.6	4	9	5	13.2	5	15.2	5	11.4	5	12.4	5	10.2	5	12.2	5	12	44	9
P07355	ANXA2	Annexin A2	5	22.8	5	32.8	5	34.2	5	34.4	5	38.8	5	33	5	32.6	5	38.4	5	43.2	45	9
P09525	ANXA4	Annexin A4	0	0	0	0	0	0	0	0	1	0.2	0	0	0	0	3	0.6	2	0.4	6	3
P08758	ANXA5	Annexin A5	5	5.4	5	5	5	6.8	5	6	5	6.8	5	7.4	5	5.4	5	6	5	6	45	9
P08133	ANXA6	Annexin A6	1	0.2	3	1.2	5	5.6	5	4.4	4	3.2	4	3	4	3.6	5	4.4	5	4.2	36	9
A0A075B752	ANXA8L1	Annexin	0	0	0	0	0	0	1	0.2	0	0	0	0	0	0	0	0	0	0	1	1
Q06278	AOX1	Aldehyde oxidase	0	0	0	0	1	0.2	0	0	0	0	0	0	0	0	0	0	0	0	1	1
Q10567	AP1B1	AP-1 complex subunit beta-1	0	0	0	0	1	0.4	0	0	0	0	0	0	0	0	0	0	1	0.2	2	2
O43747	AP1G1	AP-1 complex subunit gamma-1	0	0	0	0	1	0.4	0	0	0	0	0	0	0	0	0	0	1	0.4	2	2
A0A2R8Y611	AP3D1	AP-3 complex subunit delta-1 (Fragment)	2	1.2	3	1.6	1	0.8	3	1.6	4	2.4	3	2	3	1.6	3	1.6	3	1.6	25	9
P25054	APC	Adenomatous polyposis coli protein	1	0.2	0	0	0	0	0	0	0	0	0	0	0	0	0	0	0	0	1	1
Q96GX9	APIP	Methylthioribulose-1-phosphate dehydratase	0	0	0	0	0	0	0	0	1	0.2	0	0	0	0	0	0	0	0	1	1
Q9HDC9	APMAP	Adipocyte plasma membrane-associated protein	2	0.4	1	0.2	3	0.8	1	0.2	0	0	0	0	1	0.2	1	0.2	3	0.6	12	7
J3KQL8	APOL2	Apolipoprotein L2	0	0	0	0	0	0	0	0	2	0.4	1	0.2	0	0	0	0	0	0	3	2
O95236	APOL3	Apolipoprotein L3	0	0	0	0	0	0	1	0.4	0	0	0	0	0	0	0	0	0	0	1	1
Q9BWW8	APOL6	Apolipoprotein L6	0	0	0	0	2	0.4	0	0	1	0.2	2	0.4	1	0.2	0	0	2	0.4	8	5
Q92624	APPBP2	Amyloid protein-binding protein 2	1	0.2	0	0	0	0	0	0	0	0	0	0	0	0	0	0	0	0	1	1
P07741	APRT	Adenine phosphoribosyltransferase	1	0.4	0	0	1	0.4	0	0	0	0	1	0.4	0	0	0	0	1	0.4	4	4
P10275	AR	Androgen receptor	0	0	1	0.2	0	0	0	0	0	0	0	0	0	0	0	0	0	0	1	1
Q8WWN8	ARAP3	Arf-GAP with Rho-GAP domain, ANK repeat and PH domain-containing protein 3	0	0	0	0	0	0	1	0.2	0	0	0	0	0	0	1	0.4	0	0	2	2
B0YIW6	ARCN1	Coatomer subunit delta	2	0.4	1	0.2	1	0.2	0	0	0	0	1	0.2	0	0	0	0	2	0.6	7	5
F5H423	ARF3	Uncharacterized protein	5	1.6	5	2.2	5	3	5	2.4	5	4.6	5	4.6	5	3.4	5	3.6	4	3.8	44	9
P18085	ARF4	ADP-ribosylation factor 4	5	2.2	5	2.4	5	1.8	5	2	4	2.6	5	2.8	5	2.6	5	2.8	4	2.6	43	9
P84085	ARF5	ADP-ribosylation factor 5	3	1	2	1	3	0.8	2	0.4	3	1.8	2	1.2	2	1.4	3	1.6	3	1.8	23	9
Q5TH69	ARFGEF3	Brefeldin A-inhibited guanine nucleotide-exchange protein 3	0	0	1	0.2	0	0	0	0	0	0	0	0	0	0	0	0	0	0	1	1
A1A4S6	ARHGAP10	Rho GTPase-activating protein 10	0	0	1	0.2	0	0	0	0	0	0	0	0	0	0	0	0	0	0	1	1
Q9P227	ARHGAP23	Rho GTPase-activating protein 23	0	0	1	0.2	0	0	0	0	0	0	0	0	0	0	0	0	0	0	1	1
Q9UNA1	ARHGAP26	Rho GTPase-activating protein 26	0	0	0	0	0	0	0	0	0	0	1	0.2	1	0.2	0	0	1	0.2	3	3
Q52LW3	ARHGAP29	Rho GTPase-activating protein 29	0	0	0	0	0	0	0	0	0	0	0	0	1	0.2	0	0	0	0	1	1
Q6ZRI8	ARHGAP36	Rho GTPase-activating protein 36	0	0	0	0	0	0	0	0	1	0.2	0	0	0	0	0	0	0	0	1	1
O43182	ARHGAP6	Rho GTPase-activating protein 6	0	0	0	0	0	0	0	0	0	0	0	0	0	0	0	0	1	0.2	1	1
J3QQX2	ARHGDIA	Rho GDP-dissociation inhibitor 1	3	0.8	1	0.2	3	1.8	3	1	4	1.4	5	1.4	3	0.8	4	1	4	1.2	30	9
P52566	ARHGDIB	Rho GDP-dissociation inhibitor 2	5	4.2	4	3.2	5	4	5	4.6	5	4.4	5	4	5	4	5	4	5	4.2	44	9
O15085	ARHGEF11	Rho guanine nucleotide exchange factor 11	0	0	0	0	0	0	0	0	1	0.2	0	0	0	0	0	0	0	0	1	1
Q9NZN5	ARHGEF12	Rho guanine nucleotide exchange factor 12	0	0	0	0	1	0.2	0	0	0	0	0	0	0	0	0	0	0	0	1	1
H3BN98	ARL6IP1	Uncharacterized protein (Fragment)	4	1.2	5	1.6	5	2.2	4	1.4	5	2.2	5	2.2	5	1.8	5	1.6	5	2.2	43	9
O75915	ARL6IP5	PRA1 family protein 3	0	0	2	0.6	1	0.2	2	0.4	0	0	0	0	1	0.2	1	0.2	1	0.2	8	6
E9PR92	ARMC1	Armadillo repeat-containing protein 1	0	0	1	0.2	0	0	0	0	0	0	0	0	0	0	0	0	0	0	1	1
Q5T2S8	ARMC4	Armadillo repeat-containing protein 4	0	0	0	0	0	0	0	0	0	0	0	0	0	0	1	0.2	0	0	1	1
Q92747	ARPC1A	Actin-related protein 2/3 complex subunit 1A	0	0	0	0	0	0	1	0.2	0	0	0	0	1	0.2	0	0	0	0	2	2
A0A1W2PNV4	ARPC1B	Uncharacterized protein	0	0	1	0.2	0	0	0	0	0	0	0	0	0	0	0	0	0	0	1	1
O15144	ARPC2	Actin-related protein 2/3 complex subunit 2	5	1.6	4	1	5	2.2	4	2	4	2.2	5	1.6	5	2.4	0	0	2	0.8	34	8
O15145	ARPC3	Actin-related protein 2/3 complex subunit 3	0	0	0	0	0	0	1	0.4	1	0.4	0	0	0	0	0	0	0	0	2	2
A0A0A6YYG9	ARPC4-TTLL3	Protein ARPC4-TTLL3	1	0.2	1	0.2	0	0	2	0.4	1	0.2	1	0.2	0	0	0	0	0	0	6	5
H3BQ52	ARPP19	cAMP-regulated phosphoprotein 19	0	0	1	0.2	0	0	0	0	0	0	0	0	0	0	0	0	0	0	1	1
F8WDL2	ARPP21	cAMP-regulated phosphoprotein 21	0	0	0	0	0	0	1	0.2	0	0	0	0	0	0	0	0	0	0	1	1
Q13508	ART3	Ecto-ADP-ribosyltransferase 3	0	0	0	0	0	0	0	0	1	0.2	0	0	0	0	0	0	0	0	1	1
O00192	ARVCF	Armadillo repeat protein deleted in velo-cardio-facial syndrome	0	0	1	0.2	0	0	0	0	0	0	0	0	0	0	0	0	0	0	1	1
Q9Y576	ASB1	Ankyrin repeat and SOCS box protein 1	0	0	0	0	0	0	0	0	0	0	0	0	1	0.2	0	0	0	0	1	1
Q8WXI3	ASB10	Ankyrin repeat and SOCS box protein 10	0	0	0	0	0	0	0	0	0	0	0	0	1	0.2	0	0	0	0	1	1
Q96DX5	ASB9	Ankyrin repeat and SOCS box protein 9	0	0	0	0	0	0	0	0	0	0	0	0	0	0	0	0	1	0.2	1	1
A0A5F9ZHP1	ASCC1	Activating signal cointegrator 1 complex subunit 1	1	0.2	0	0	0	0	0	0	0	0	1	0.2	0	0	0	0	0	0	2	2
Q96FT7	ASIC4	Acid-sensing ion channel 4	0	0	0	0	1	0.2	0	0	0	0	0	0	0	0	0	0	0	0	1	1
O14525	ASTN1	Astrotactin-1	0	0	0	0	0	0	0	0	0	0	0	0	0	0	1	0.2	0	0	1	1
O75129	ASTN2	Astrotactin-2	0	0	0	0	0	0	0	0	0	0	0	0	0	0	1	0.2	0	0	1	1
Q9ULI0	ATAD2B	ATPase family AAA domain-containing protein 2B	0	0	0	0	0	0	1	0.2	0	0	0	0	0	0	0	0	0	0	1	1
Q9NVI7	ATAD3A	ATPase family AAA domain-containing protein 3A	1	0.4	0	0	0	0	0	0	0	0	0	0	0	0	0	0	0	0	1	1
Q5T9A4	ATAD3B	ATPase family AAA domain-containing protein 3B	1	0.2	0	0	0	0	0	0	0	0	0	0	0	0	0	0	0	0	1	1
Q6VMQ6	ATF7IP	Activating transcription factor 7-interacting protein 1	1	0.2	0	0	0	0	0	0	0	0	1	0.2	0	0	0	0	2	0.4	4	3
Q96BY7	ATG2B	Autophagy-related protein 2 homolog B	2	0.4	0	0	0	0	0	0	0	0	0	0	0	0	0	0	2	0.4	4	2
Q92858	ATOH1	Protein atonal homolog 1	1	0.2	0	0	0	0	1	0.2	0	0	0	0	0	0	0	0	0	0	2	2
O94823	ATP10B	Probable phospholipid-transporting ATPase VB	0	0	1	0.2	0	0	1	0.2	0	0	0	0	0	0	0	0	0	0	2	2
Q8NB49	ATP11C	Phospholipid-transporting ATPase IG	0	0	0	0	0	0	0	0	0	0	1	0.2	0	0	0	0	0	0	1	1
Q4VNC1	ATP13A4	Probable cation-transporting ATPase 13A4	0	0	0	0	0	0	0	0	0	0	0	0	1	0.2	0	0	0	0	1	1
A0A0A0MT26	ATP1A3	Sodium/potassium-transporting ATPase subunit alpha-3	0	0	0	0	0	0	1	0.4	1	0.2	0	0	0	0	0	0	0	0	2	2
P16615	ATP2A2	Sarcoplasmic/endoplasmic reticulum calcium ATPase 2	0	0	0	0	0	0	1	0.2	0	0	0	0	0	0	0	0	0	0	1	1
P20648	ATP4A	Potassium-transporting ATPase alpha chain 1	2	0.4	0	0	0	0	0	0	0	0	0	0	0	0	0	0	1	0.2	3	2
P25705	ATP5F1A	ATP synthase subunit alpha, mitochondrial	5	11.8	5	8.2	5	10.6	5	9.8	5	10.6	5	11.2	5	8	5	8.6	5	10.4	45	9
P06576	ATP5F1B	ATP synthase subunit beta, mitochondrial	5	9	5	6.4	5	8.4	5	9.6	5	9.4	5	8.8	5	9	5	8.4	5	7	45	9
P36542	ATP5F1C	ATP synthase subunit gamma, mitochondrial	2	0.4	0	0	1	0.2	0	0	0	0	1	0.2	0	0	0	0	0	0	4	3
Q9UII2	ATP5IF1	ATPase inhibitor, mitochondrial	0	0	1	0.2	0	0	0	0	0	0	0	0	1	0.6	1	0.8	0	0	3	3
P24539	ATP5PB	ATP synthase F(0) complex subunit B1, mitochondrial	3	2	4	4.4	4	3.8	5	2.8	5	3.6	5	2.4	4	2.4	4	2.8	4	3.2	38	9
O75947	ATP5PD	ATP synthase subunit d, mitochondrial	1	0.4	0	0	0	0	0	0	0	0	0	0	0	0	0	0	0	0	1	1
Q9HBG4	ATP6V0A4	V-type proton ATPase 116 kDa subunit a isoform 4	0	0	1	0.2	0	0	0	0	0	0	0	0	0	0	0	0	0	0	1	1
P38606	ATP6V1A	V-type proton ATPase catalytic subunit A	1	0.2	0	0	0	0	0	0	0	0	0	0	0	0	0	0	0	0	1	1
Q96A05	ATP6V1E2	V-type proton ATPase subunit E 2	0	0	0	0	2	0.4	0	0	0	0	1	0.4	1	0.2	1	0.2	0	0	5	4
P35670	ATP7B	Copper-transporting ATPase 2	0	0	0	0	0	0	0	0	1	0.2	0	0	0	0	0	0	0	0	1	1
Q9Y2Q0	ATP8A1	Phospholipid-transporting ATPase IA	0	0	0	0	0	0	0	0	0	0	0	0	1	0.2	0	0	0	0	1	1
Q8TF62	ATP8B4	Probable phospholipid-transporting ATPase IM	0	0	0	0	0	0	0	0	1	0.2	0	0	0	0	0	0	0	0	1	1
Q13535	ATR	Serine/threonine-protein kinase ATR	0	0	0	0	1	0.2	0	0	0	0	0	0	0	0	0	0	0	0	1	1
Q6UW56	ATRAID	All-trans retinoic acid-induced differentiation factor	0	0	0	0	1	0.2	0	0	0	0	0	0	0	0	0	0	0	0	1	1
A0A1W2PQD2	ATXN10	Ataxin-10	0	0	1	0.2	0	0	0	0	0	0	0	0	0	0	0	0	0	0	1	1
C9IZF2	ATXN7L1	Ataxin-7-like protein 1	0	0	0	0	0	0	0	0	1	0.2	0	0	0	0	0	0	0	0	1	1
O14977	AZIN1	Antizyme inhibitor 1	0	0	0	0	0	0	0	0	0	0	0	0	0	0	1	0.4	0	0	1	1
E9PHD9	B4GALNT3	Beta-1,4-N-acetylgalactosaminyltransferase 3 (Fragment)	0	0	0	0	0	0	1	0.2	0	0	0	0	0	0	0	0	0	0	1	1
Q9BYV9	BACH2	Transcription regulator protein BACH2	0	0	0	0	0	0	0	0	0	0	0	0	0	0	0	0	1	0.2	1	1
Q6UXY1	BAIAP2L2	Brain-specific angiogenesis inhibitor 1-associated protein 2-like protein 2	0	0	0	0	0	0	0	0	0	0	0	0	0	0	0	0	1	0.2	1	1
O75531	BANF1	Barrier-to-autointegration factor	5	3.2	4	2.6	5	2.2	4	2.4	4	2.8	5	2.4	4	2	5	3.4	5	2.2	41	9
P80723	BASP1	Brain acid soluble protein 1	5	3.2	4	1.6	4	2.8	5	3.6	4	2.2	5	3.6	3	1.2	4	2.8	5	3.6	39	9
H3BRY9	BBS4	Bardet-Biedl syndrome 4 protein	0	0	0	0	0	0	0	0	1	0.2	0	0	1	0.2	0	0	0	0	2	2
P51572	BCAP31	B-cell receptor-associated protein 31	4	3	4	1.4	2	0.6	5	2.8	5	3.6	3	1.6	5	2.8	5	1.8	1	0.4	34	9
Q9H6U6	BCAS3	Breast carcinoma-amplified sequence 3	0	0	0	0	0	0	0	0	0	0	0	0	1	0.2	0	0	0	0	1	1
H0Y885	BCHE	Cholinesterase (Fragment)	0	0	0	0	0	0	0	0	0	0	0	0	0	0	1	0.2	0	0	1	1
Q8N143	BCL6B	B-cell CLL/lymphoma 6 member B protein	0	0	0	0	1	0.2	0	0	0	0	0	0	0	0	0	0	0	0	1	1
H0YCL7	BCO2	Beta,beta-carotene 9',10'-oxygenase (Fragment)	0	0	1	0.2	3	0.8	0	0	0	0	0	0	0	0	3	1.2	1	0.2	8	4
V9GYD4	BCORL1	BCL-6 corepressor-like protein 1	0	0	0	0	0	0	1	0.2	0	0	0	0	0	0	0	0	0	0	1	1
P54132	BLM	Bloom syndrome protein	0	0	0	0	0	0	1	0.2	0	0	0	0	0	0	0	0	0	0	1	1
O95972	BMP15	Bone morphogenetic protein 15	0	0	0	0	0	0	0	0	1	0.2	0	0	0	0	0	0	0	0	1	1
P18075	BMP7	Bone morphogenetic protein 7	0	0	1	0.2	0	0	0	0	0	0	0	0	0	0	1	0.2	0	0	2	2
P51813	BMX	Cytoplasmic tyrosine-protein kinase BMX	0	0	0	0	0	0	0	0	0	0	0	0	1	0.2	0	0	0	0	1	1
Q9BWV1	BOC	Brother of CDO	0	0	0	0	1	0.2	0	0	0	0	0	0	0	0	0	0	0	0	1	1
A0A087WV86	BORA	Protein aurora borealis	0	0	1	0.2	0	0	1	0.2	0	0	0	0	1	0.2	0	0	0	0	3	3
Q12830	BPTF	Nucleosome-remodeling factor subunit BPTF	0	0	0	0	0	0	0	0	0	0	0	0	0	0	1	0.2	0	0	1	1
P38398	BRCA1	Breast cancer type 1 susceptibility protein	0	0	0	0	1	0.2	0	0	0	0	0	0	0	0	0	0	0	0	1	1
H7C413	BRCC3	Lys-63-specific deubiquitinase BRCC36 (Fragment)	0	0	1	0.4	0	0	2	1.6	1	0.4	1	0.4	1	0.4	0	0	0	0	6	5
H0YAW8	BRD9	Bromodomain-containing protein 9 (Fragment)	1	0.2	0	0	0	0	0	0	0	0	0	0	0	0	0	0	0	0	1	1
Q9ULD4	BRPF3	Bromodomain and PHD finger-containing protein 3	0	0	0	0	0	0	1	0.2	0	0	0	0	0	0	0	0	0	0	1	1
Q9NSI6	BRWD1	Bromodomain and WD repeat-containing protein 1	0	0	0	0	0	0	1	0.2	0	0	0	0	0	0	0	0	0	0	1	1
H0Y984	BST1	ADP-ribosyl cyclase/cyclic ADP-ribose hydrolase 2 (Fragment)	0	0	0	0	0	0	1	0.2	0	0	0	0	0	0	0	0	0	0	1	1
A0A0A0MSF4	BTBD9	BTB/POZ domain-containing protein 9	0	0	0	0	0	0	0	0	0	0	0	0	1	0.2	0	0	0	0	1	1
P20290	BTF3	Transcription factor BTF3	2	0.8	1	0.4	2	0.8	2	0.8	1	0.4	0	0	0	0	2	1	0	0	10	6
Q13895	BYSL	Bystin	0	0	0	0	0	0	0	0	0	0	0	0	1	0.2	0	0	0	0	1	1
Q7L1Q6	BZW1	Basic leucine zipper and W2 domain-containing protein 1	5	3.6	3	1.8	4	2.2	5	4	4	2	4	1.8	5	4	5	2.2	5	3	40	9
Q9NQ89	C12orf4	Protein C12orf4	0	0	0	0	0	0	0	0	0	0	1	0.2	0	0	0	0	0	0	1	1
Q86WS4	C12orf40	Uncharacterized protein C12orf40	0	0	0	0	0	0	0	0	0	0	0	0	1	0.2	0	0	0	0	1	1
Q7Z2V1	C16orf82	Protein TNT	0	0	0	0	0	0	0	0	1	0.2	1	0.2	0	0	0	0	0	0	2	2
A0A0A0MT71	C16orf89	UPF0764 protein C16orf89	0	0	1	0.2	0	0	0	0	0	0	0	0	0	0	0	0	0	0	1	1
Q96B23	C18orf25	Uncharacterized protein C18orf25	0	0	0	0	0	0	1	0.2	0	0	0	0	0	0	0	0	0	0	1	1
Q07021	C1QBP	Complement component 1 Q subcomponent-binding protein, mitochondrial	1	0.2	2	1.2	0	0	2	0.8	1	0.4	4	1.8	0	0	1	0.4	4	1.8	15	7
Q5TEA3	C20orf194	Uncharacterized protein C20orf194	1	0.2	0	0	0	0	0	0	0	0	0	0	0	0	0	0	0	0	1	1
Q4AC94	C2CD3	C2 domain-containing protein 3	0	0	1	0.4	0	0	0	0	0	0	0	0	0	0	0	0	0	0	1	1
Q96LR7	C2orf50	Uncharacterized protein C2orf50	0	0	0	0	0	0	0	0	1	0.2	0	0	0	0	0	0	0	0	1	1
P01031	C5	Complement C5	0	0	0	0	0	0	0	0	0	0	0	0	1	0.2	0	0	0	0	1	1
F2Z3F1	C5orf67	Uncharacterized protein C5orf67	1	0.2	0	0	0	0	0	0	0	0	0	0	0	0	0	0	0	0	1	1
Q9BPX7	C7orf25	UPF0415 protein C7orf25	0	0	0	0	0	0	0	0	0	0	0	0	1	0.2	0	0	0	0	1	1
P23280	CA6	Carbonic anhydrase 6	0	0	0	0	0	0	0	0	0	0	1	0.2	0	0	0	0	0	0	1	1
C9J8G2	CABP1	Calcium-binding protein 1	1	0.2	0	0	0	0	0	0	0	0	0	0	0	0	0	0	0	0	1	1
P57796	CABP4	Calcium-binding protein 4	0	0	0	0	0	0	0	0	0	0	1	0.2	0	0	0	0	0	0	1	1
Q86V35	CABP7	Calcium-binding protein 7	0	0	1	0.2	0	0	0	0	0	0	0	0	1	0.4	0	0	0	0	2	2
A0A087WW63	CACNA1A	Voltage-dependent P/Q-type calcium channel subunit alpha	0	0	1	0.2	0	0	0	0	0	0	0	0	0	0	0	0	0	0	1	1
O60840	CACNA1F	Voltage-dependent L-type calcium channel subunit alpha-1F	1	0.2	0	0	0	0	0	0	0	0	0	0	0	0	0	0	0	0	1	1
O00305	CACNB4	Voltage-dependent L-type calcium channel subunit beta-4	0	0	0	0	0	0	1	0.2	0	0	0	0	0	0	0	0	0	0	1	1
Q05682	CALD1	Caldesmon	4	3	5	3.2	5	3	5	2.4	4	1.2	3	1.2	5	3.8	2	0.8	5	1.4	38	9
E7EMB3	CALM2	Calmodulin-2	2	0.4	1	0.4	1	0.2	1	0.2	0	0	0	0	1	0.2	0	0	2	0.4	8	6
P27797	CALR	Calreticulin	5	45.4	5	44	5	46.8	5	41.2	5	48	5	43	5	41.4	5	42.8	5	43.2	45	9
O43852	CALU	Calumenin	5	2.2	4	2	1	0.4	3	1.2	2	0.8	1	0.4	2	1.2	3	1	1	0.4	22	9
Q13555	CAMK2G	Calcium/calmodulin-dependent protein kinase type II subunit gamma	0	0	0	0	0	0	1	0.2	0	0	0	0	0	0	0	0	0	0	1	1
P27824	CANX	Calnexin	5	6.4	5	7.4	5	9.6	5	7	5	5.2	5	7	5	8	5	6.2	5	11.2	45	9
Q01518	CAP1	Adenylyl cyclase-associated protein 1	5	5.6	5	2.6	5	6.4	5	4	5	6	5	5.8	4	4.4	4	2.8	4	2.6	42	9
Q9HC96	CAPN10	Calpain-10	0	0	0	0	0	0	0	0	1	0.2	0	0	0	0	0	0	0	0	1	1
Q9UMQ6	CAPN11	Calpain-11	0	0	0	0	0	0	0	0	0	0	1	0.2	0	0	0	0	0	0	1	1
P17655	CAPN2	Calpain-2 catalytic subunit	0	0	2	0.8	1	0.4	3	1.2	0	0	1	0.4	3	1	3	1	1	0.4	14	7
O14815	CAPN9	Calpain-9	0	0	0	0	0	0	0	0	0	0	0	0	1	0.2	0	0	0	0	1	1
A0A0C4DGQ5	CAPNS1	Calpain small subunit 1	0	0	2	0.4	3	0.6	0	0	0	0	0	0	0	0	1	0.2	2	0.4	8	4
C9J524	CAPS2	Calcyphosin-2 (Fragment)	0	0	0	0	1	0.2	0	0	0	0	0	0	0	0	0	0	0	0	1	1
P52907	CAPZA1	F-actin-capping protein subunit alpha-1	4	0.8	4	0.8	4	0.8	3	0.6	3	0.8	3	0.6	4	0.8	3	0.6	2	0.8	30	9
Q9BXL7	CARD11	Caspase recruitment domain-containing protein 11	0	0	0	0	0	0	0	0	0	0	1	0.4	0	0	0	0	0	0	1	1
Q92851	CASP10	Caspase-10	1	0.2	0	0	0	0	0	0	0	0	0	0	0	0	0	0	0	0	1	1
P49662	CASP4	Caspase-4	1	0.2	0	0	0	0	0	0	0	0	0	0	0	0	0	0	0	0	1	1
Q9UKL3	CASP8AP2	CASP8-associated protein 2	0	0	0	0	0	0	0	0	0	0	0	0	0	0	0	0	1	0.2	1	1
A0A0C4DGB5	CAST	Calpastatin	1	0.2	0	0	1	0.2	0	0	0	0	0	0	2	0.6	0	0	0	0	4	3
Q03135	CAV1	Caveolin-1	0	0	2	0.8	1	0.4	2	1.4	1	0.8	2	0.8	1	0.4	0	0	0	0	9	6
P51636	CAV2	Caveolin-2	0	0	0	0	0	0	0	0	0	0	0	0	0	0	0	0	1	0.2	1	1
Q6NZI2	CAVIN1	Caveolae-associated protein 1	5	5.4	5	5	5	5.4	5	5.6	5	4.2	5	3	5	5	5	5.4	5	5.2	45	9
O95810	CAVIN2	Caveolae-associated protein 2	3	1.2	5	3.2	4	2.8	2	0.8	4	3	3	2.2	4	2.8	2	1.6	5	3.2	32	9
P22681	CBL	E3 ubiquitin-protein ligase CBL	0	0	0	0	0	0	0	0	0	0	1	0.2	0	0	0	0	0	0	1	1
A0A2R8YFD4	CBLB	E3 ubiquitin-protein ligase CBL	0	0	0	0	0	0	0	0	0	0	0	0	1	0.2	1	0.2	1	0.2	3	3
P27352	CBLIF	Cobalamin binding intrinsic factor	1	0.2	0	0	0	0	0	0	0	0	0	0	0	0	0	0	0	0	1	1
P16152	CBR1	Carbonyl reductase [NADPH] 1	0	0	0	0	0	0	1	0.2	0	0	0	0	0	0	0	0	0	0	1	1
Q13185	CBX3	Chromobox protein homolog 3	2	1.6	0	0	2	0.8	3	0.8	1	0.4	3	1	1	0.4	2	0.8	2	0.6	16	8
Q8N163	CCAR2	Cell cycle and apoptosis regulator protein 2	0	0	0	0	0	0	0	0	0	0	1	0.2	0	0	0	0	0	0	1	1
Q8IYE0	CCDC146	Coiled-coil domain-containing protein 146	0	0	0	0	0	0	0	0	1	0.2	0	0	0	0	0	0	0	0	1	1
Q6PII3	CCDC174	Coiled-coil domain-containing protein 174	0	0	0	0	0	0	0	0	1	0.2	0	0	0	0	0	0	0	0	1	1
Q9P1Z9	CCDC180	Coiled-coil domain-containing protein 180	0	0	0	0	0	0	1	0.2	0	0	0	0	0	0	0	0	0	0	1	1
Q8NCU4	CCDC191	Coiled-coil domain-containing protein 191	1	0.2	0	0	2	0.4	0	0	0	0	0	0	1	0.2	0	0	0	0	4	3
V9GYE2	CCDC24	Coiled-coil domain-containing protein 24	1	0.2	0	0	0	0	0	0	0	0	0	0	0	0	0	0	0	0	1	1
Q96A33	CCDC47	Coiled-coil domain-containing protein 47	0	0	0	0	1	0.4	3	1.2	0	0	2	0.8	0	0	0	0	0	0	6	3
Q96ER9	CCDC51	Mitochondrial potassium channel	0	0	0	0	0	0	0	0	1	0.2	0	0	0	0	1	0.2	0	0	2	2
Q6ZRK6	CCDC73	Coiled-coil domain-containing protein 73	1	0.2	0	0	0	0	0	0	1	0.2	0	0	0	0	0	0	1	0.2	3	3
Q8N4S0	CCDC82	Coiled-coil domain-containing protein 82	0	0	0	0	0	0	1	0.2	0	0	0	0	0	0	0	0	0	0	1	1
Q8N998	CCDC89	Coiled-coil domain-containing protein 89	0	0	0	0	0	0	0	0	0	0	0	0	0	0	0	0	1	0.2	1	1
P32238	CCKAR	Cholecystokinin receptor type A	0	0	0	0	0	0	0	0	1	0.2	0	0	0	0	0	0	0	0	1	1
A0A087X089	CCL14	C-C motif chemokine	0	0	0	0	0	0	0	0	0	0	0	0	0	0	1	0.2	0	0	1	1
Q14094	CCNI	Cyclin-I	0	0	0	0	0	0	0	0	0	0	0	0	0	0	0	0	1	0.2	1	1
P51686	CCR9	C-C chemokine receptor type 9	0	0	0	0	0	0	0	0	0	0	0	0	0	0	0	0	1	0.2	1	1
P78371	CCT2	T-complex protein 1 subunit beta	2	0.6	1	0.8	3	1.4	3	2.6	3	1	3	0.6	3	1.4	2	0.8	3	1.8	23	9
P49368	CCT3	T-complex protein 1 subunit gamma	2	0.8	4	1.4	1	0.2	4	1.2	4	1.6	2	0.4	5	1.6	4	1.2	2	1.2	28	9
P50991	CCT4	T-complex protein 1 subunit delta	0	0	0	0	0	0	2	0.4	0	0	0	0	0	0	0	0	0	0	2	1
P48643	CCT5	T-complex protein 1 subunit epsilon	3	0.8	3	1	2	0.6	1	0.2	2	1	2	0.6	3	0.6	1	0.2	3	1.2	20	9
P40227	CCT6A	T-complex protein 1 subunit zeta	3	2.4	5	4.6	4	4.4	5	3.8	5	5.6	5	4	5	4.2	5	4.8	5	4.8	42	9
Q99832	CCT7	T-complex protein 1 subunit eta	5	4.2	5	6.2	5	4.6	5	3.8	5	4	5	3.8	5	4.6	5	4	5	3.4	45	9
P50990	CCT8	T-complex protein 1 subunit theta	5	2.4	2	0.8	2	0.8	1	0.2	2	0.6	3	2	3	1	2	0.6	2	0.8	22	9
P16070	CD44	CD44 antigen	0	0	0	0	0	0	1	0.2	0	0	0	0	0	0	0	0	0	0	1	1
Q08722	CD47	Leukocyte surface antigen CD47	0	0	0	0	0	0	0	0	0	0	0	0	1	0.2	0	0	1	0.4	2	2
P13987	CD59	CD59 glycoprotein	2	0.8	0	0	0	0	1	0.4	1	0.2	1	0.4	0	0	1	0.4	0	0	6	5
P33681	CD80	T-lymphocyte activation antigen CD80	0	0	0	0	0	0	0	0	0	0	1	0.2	0	0	0	0	0	0	1	1
G8JLH6	CD9	Tetraspanin	0	0	0	0	1	0.4	0	0	1	0.4	0	0	0	0	0	0	0	0	2	2
Q9NPY3	CD93	Complement component C1q receptor	0	0	0	0	1	0.4	0	0	0	0	0	0	0	0	0	0	0	0	1	1
P14209	CD99	CD99 antigen	2	0.4	3	0.6	2	0.4	0	0	1	0.2	2	0.4	1	0.2	0	0	1	0.2	12	7
C9JSP6	CDC14A	Dual-specificity protein phosphatase CDC14A (Fragment)	0	0	0	0	0	0	0	0	0	0	0	0	0	0	1	0.2	0	0	1	1
Q8NHZ8	CDC26	Anaphase-promoting complex subunit CDC26	0	0	1	0.4	0	0	1	0.4	1	0.2	2	0.6	1	0.4	0	0	0	0	6	5
Q16543	CDC37	Hsp90 co-chaperone Cdc37	2	0.8	3	1.2	0	0	1	0.4	3	1.4	0	0	2	0.8	0	0	0	0	11	5
P60953	CDC42	Cell division control protein 42 homolog	5	6.4	5	6.2	5	5.8	5	6.2	5	6.4	5	6.4	5	6.6	5	7.2	5	6.8	45	9
Q99459	CDC5L	Cell division cycle 5-like protein	0	0	0	0	0	0	0	0	2	0.8	1	0.2	1	0.4	0	0	0	0	4	3
Q13634	CDH18	Cadherin-18	1	0.2	0	0	0	0	0	0	0	0	0	0	0	0	0	0	0	0	1	1
J3QR34	CDH3	Cadherin-3	0	0	0	0	0	0	0	0	1	0.4	0	0	1	0.2	1	0.2	0	0	3	3
Q96SZ6	CDK5RAP1	Mitochondrial tRNA methylthiotransferase CDK5RAP1	0	0	0	0	0	0	0	0	0	0	0	0	1	0.2	0	0	0	0	1	1
Q00532	CDKL1	Cyclin-dependent kinase-like 1	0	0	0	0	1	0.2	0	0	0	0	0	0	0	0	0	0	0	0	1	1
E7ES52	CDKN1B	Cyclin-dependent kinase inhibitor 1B	1	0.2	1	0.2	0	0	0	0	0	0	0	0	0	0	0	0	0	0	2	2
Q9BXD7	CDRT1	CMT duplicated region transcript 1	0	0	0	0	0	0	1	0.2	0	0	0	0	0	0	0	0	0	0	1	1
D6RGC8	CDS1	Phosphatidate cytidylyltransferase 1	0	0	1	0.2	0	0	0	0	0	0	0	0	0	0	0	0	0	0	1	1
P17676	CEBPB	CCAAT/enhancer-binding protein beta	0	0	0	0	0	0	0	0	1	0.2	0	0	0	0	1	0.2	0	0	2	2
Q9NYQ6	CELSR1	Cadherin EGF LAG seven-pass G-type receptor 1	0	0	1	0.2	0	0	0	0	0	0	0	0	0	0	0	0	0	0	1	1
Q02224	CENPE	Centromere-associated protein E	1	0.2	0	0	0	0	0	0	0	0	0	0	0	0	0	0	0	0	1	1
Q9P2H0	CEP126	Centrosomal protein of 126 kDa	0	0	0	0	0	0	0	0	0	0	0	0	1	0.2	1	0.2	0	0	2	2
O94986	CEP152	Centrosomal protein of 152 kDa	0	0	0	0	1	0.2	0	0	0	0	0	0	0	0	0	0	0	0	1	1
Q5VT06	CEP350	Centrosome-associated protein 350	1	0.2	0	0	0	0	0	0	0	0	0	0	0	0	0	0	0	0	1	1
Q8IU89	CERS3	Ceramide synthase 3	0	0	0	0	0	0	0	0	0	0	0	0	1	0.2	1	0.2	0	0	2	2
A0A2R8Y7C5	CERT1	Ceramide transfer protein	0	0	0	0	0	0	1	0.2	0	0	0	0	0	0	0	0	0	0	1	1
Q5VTH2	CFAP126	Protein Flattop	0	0	0	0	0	0	0	0	0	0	0	0	0	0	1	0.2	0	0	1	1
Q8TBY9	CFAP251	Cilia- and flagella-associated protein 251	0	0	0	0	0	0	1	0.2	0	0	0	0	0	0	0	0	0	0	1	1
Q96MT7	CFAP44	Cilia- and flagella-associated protein 44	0	0	0	0	0	0	0	0	1	0.2	0	0	0	0	0	0	0	0	1	1
Q5T655	CFAP58	Cilia- and flagella-associated protein 58	0	0	0	0	0	0	1	0.4	0	0	0	0	0	0	2	0.4	0	0	3	2
Q9C0B2	CFAP74	Cilia- and flagella-associated protein 74	0	0	0	0	0	0	1	0.2	1	0.2	0	0	0	0	1	0.2	0	0	3	3
E9PK25	CFL1	Cofilin-1	5	8.4	5	15	5	11.4	5	12.8	5	12	5	16.2	5	10.2	5	12.4	5	15.4	45	9
P13569	CFTR	Cystic fibrosis transmembrane conductance regulator	0	0	0	0	1	0.4	0	0	0	0	0	0	0	0	0	0	0	0	1	1
Q12873	CHD3	Chromodomain-helicase-DNA-binding protein 3	0	0	0	0	1	0.2	1	0.2	0	0	1	0.2	0	0	2	0.4	1	0.2	6	5
P05060	CHGB	Secretogranin-1	0	0	0	0	0	0	0	0	0	0	0	0	0	0	1	0.2	0	0	1	1
Q8IZ52	CHPF	Chondroitin sulfate synthase 2	0	0	0	0	0	0	1	0.2	0	0	0	0	0	0	0	0	0	0	1	1
A0A1B0GV25	CHRNA7	Neuronal acetylcholine receptor subunit alpha-7 (Fragment)	0	0	0	0	0	0	0	0	0	0	1	0.2	0	0	0	0	0	0	1	1
Q7LFX5	CHST15	Carbohydrate sulfotransferase 15	0	0	0	0	0	0	0	0	0	0	1	0.2	0	0	0	0	0	0	1	1
K7ELT6	CIRBP	Cold-inducible RNA-binding protein	0	0	0	0	0	0	1	0.2	0	0	0	0	0	0	0	0	0	0	1	1
Q07065	CKAP4	Cytoskeleton-associated protein 4	5	3.4	5	4.6	5	4.6	5	5.6	5	4.6	5	4.6	5	5.4	5	4.2	5	4.4	45	9
P06732	CKM	Creatine kinase M-type	0	0	0	0	0	0	0	0	1	0.2	0	0	0	0	0	0	0	0	1	1
K7EP11	CLASRP	CLK4-associating serine/arginine-rich protein (Fragment)	0	0	1	0.2	0	0	0	0	0	0	0	0	0	0	0	0	0	0	1	1
Q9Y6N3	CLCA3P	Calcium-activated chloride channel regulator family member 3	0	0	0	0	0	0	0	0	0	0	0	0	0	0	1	0.2	0	0	1	1
Q96S66	CLCC1	Chloride channel CLIC-like protein 1	1	0.2	0	0	1	0.2	0	0	0	0	0	0	0	0	0	0	0	0	2	2
Q9BXN2	CLEC7A	C-type lectin domain family 7 member A	0	0	0	0	0	0	0	0	1	0.2	0	0	0	0	0	0	0	0	1	1
O00299	CLIC1	Chloride intracellular channel protein 1	5	3.2	4	2.4	4	2.4	4	2.8	4	2.4	4	3.2	3	1.2	2	1.2	5	6	35	9
Q9Y696	CLIC4	Chloride intracellular channel protein 4	4	1.4	5	2.8	5	5.2	5	3.8	5	4.8	5	4	5	4.6	5	3.4	4	3	43	9
A0A0A0MSJ4	CLNK	Cytokine-dependent hematopoietic cell linker	0	0	0	0	1	0.2	0	0	1	0.2	0	0	0	0	0	0	1	0.2	3	3
E9PL17	CLP1	Polyribonucleotide 5'-hydroxyl-kinase Clp1	0	0	0	0	0	0	0	0	1	0.2	0	0	0	0	0	0	0	0	1	1
F8WF69	CLTA	Clathrin light chain	3	0.8	4	1	3	0.8	3	0.8	4	1	2	0.6	2	0.4	2	0.4	4	1.4	27	9
A0A087WVQ6	CLTC	Clathrin heavy chain	5	5.4	5	5.2	5	10.2	5	5.2	5	6.6	5	7.2	5	6.4	5	8.8	5	10	45	9
P53675	CLTCL1	Clathrin heavy chain 2	3	0.8	2	1	2	1.8	1	0.6	1	0.2	1	1	2	0.8	1	0.2	2	1	15	9
Q8IUQ0	CLVS1	Clavesin-1	0	0	0	0	0	0	0	0	0	0	0	0	1	0.2	0	0	2	0.4	3	2
Q9Y471	CMAHP	Inactive cytidine monophosphate-N-acetylneuraminic acid hydroxylase	0	0	1	0.2	0	0	0	0	0	0	0	0	0	0	0	0	0	0	1	1
F5GYM0	CMAS	N-acylneuraminate cytidylyltransferase (Fragment)	0	0	0	0	0	0	0	0	0	0	0	0	1	0.2	0	0	0	0	1	1
P30085	CMPK1	UMP-CMP kinase	0	0	0	0	1	0.4	0	0	1	0.4	3	1.2	0	0	1	0.4	0	0	6	4
Q8N3K9	CMYA5	Cardiomyopathy-associated protein 5	0	0	1	0.2	1	0.2	0	0	0	0	0	0	0	0	0	0	0	0	2	2
O75829	CNMD	Leukocyte cell-derived chemotaxin 1	0	0	0	0	0	0	0	0	0	0	0	0	0	0	1	0.2	0	0	1	1
B4DUT8	CNN2	Calponin	1	0.4	2	0.8	0	0	2	0.6	0	0	1	0.4	1	0.2	2	0.8	0	0	9	6
Q9NZN8	CNOT2	CCR4-NOT transcription complex subunit 2	0	0	0	0	0	0	0	0	1	0.2	0	0	0	0	0	0	0	0	1	1
A0A1W2PQ11	CNTN2	Contactin-2	0	0	0	0	0	0	0	0	0	0	0	0	0	0	1	0.2	0	0	1	1
Q8IWV2	CNTN4	Contactin-4	0	0	0	0	0	0	0	0	0	0	0	0	1	0.2	0	0	0	0	1	1
Q13057	COASY	Bifunctional coenzyme A synthase	0	0	0	0	0	0	0	0	0	0	0	0	1	0.2	0	0	0	0	1	1
U3KQU7	COG5	Conserved oligomeric Golgi complex subunit 5 (Fragment)	0	0	0	0	0	0	0	0	0	0	0	0	1	0.2	0	0	0	0	1	1
Q07092	COL16A1	Collagen alpha-1(XVI) chain	1	0.2	0	0	0	0	0	0	0	0	0	0	1	0.2	0	0	0	0	2	2
Q8NFW1	COL22A1	Collagen alpha-1(XXII) chain	0	0	1	0.2	0	0	0	0	0	0	0	0	0	0	0	0	0	0	1	1
P02458	COL2A1	Collagen alpha-1(II) chain	0	0	0	0	1	0.2	0	0	0	0	0	0	0	0	0	0	0	0	1	1
P02462	COL4A1	Collagen alpha-1(IV) chain	3	0.6	5	3	5	4.4	3	1	5	2.4	5	4	1	0.2	5	1.8	5	3.6	37	9
P08572	COL4A2	Collagen alpha-2(IV) chain	3	1	5	3.6	5	6.4	1	0.2	5	4.4	5	5	0	0	5	4.2	5	5.2	34	8
Q01955	COL4A3	Collagen alpha-3(IV) chain	0	0	0	0	0	0	0	0	0	0	0	0	0	0	0	0	1	0.2	1	1
P12110	COL6A2	Collagen alpha-2(VI) chain	0	0	0	0	0	0	0	0	1	0.2	0	0	0	0	0	0	0	0	1	1
A6NMZ7	COL6A6	Collagen alpha-6(VI) chain	0	0	0	0	0	0	0	0	1	0.2	0	0	1	0.2	0	0	0	0	2	2
Q8NBJ5	COLGALT1	Procollagen galactosyltransferase 1	2	1.2	1	0.4	3	1.6	1	0.4	1	0.8	1	0.4	0	0	0	0	3	1.6	12	7
Q8N668	COMMD1	COMM domain-containing protein 1	0	0	1	0.2	0	0	0	0	0	0	0	0	0	0	0	0	0	0	1	1
P21964	COMT	Catechol O-methyltransferase	0	0	0	0	0	0	0	0	0	0	0	0	0	0	0	0	1	0.8	1	1
P53621	COPA	Coatomer subunit alpha	0	0	0	0	0	0	1	0.4	0	0	0	0	0	0	0	0	0	0	1	1
P53618	COPB1	Coatomer subunit beta	1	0.4	0	0	0	0	0	0	0	0	0	0	0	0	0	0	0	0	1	1
P35606	COPB2	Coatomer subunit beta'	0	0	1	0.4	0	0	0	0	1	0.4	0	0	0	0	1	0.2	0	0	3	3
M0QXB4	COPE	Coatomer protein complex, subunit epsilon, isoform CRA_g	3	2.6	4	1.8	3	1.8	5	3.6	4	2.2	3	1.8	3	2	5	2.6	3	1	33	9
Q9Y678	COPG1	Coatomer subunit gamma-1	1	0.2	1	0.4	0	0	1	0.2	0	0	1	0.2	0	0	1	0.2	0	0	5	5
D6RFN0	COPS4	COP9 signalosome complex subunit 4	2	0.8	5	1.6	1	0.2	2	1.4	2	1	3	1.2	2	1	5	2.6	1	0.2	23	9
Q5HYK3	COQ5	2-methoxy-6-polyprenyl-1,4-benzoquinol methylase, mitochondrial	1	0.4	0	0	0	0	0	0	0	0	0	0	0	0	0	0	0	0	1	1
Q96D53	COQ8B	Atypical kinase COQ8B, mitochondrial	0	0	0	0	0	0	1	0.2	0	0	0	0	0	0	0	0	0	0	1	1
Q9BR76	CORO1B	Coronin-1B	0	0	0	0	0	0	0	0	0	0	1	0.2	1	0.2	0	0	0	0	2	2
Q9ULV4	CORO1C	Coronin-1C	3	2	5	4	2	0.8	4	1.8	3	1.6	1	0.4	4	2.6	2	1	4	1.6	28	9
Q14019	COTL1	Coactosin-like protein	0	0	0	0	0	0	0	0	0	0	1	0.2	0	0	1	0.2	1	0.2	3	3
P13073	COX4I1	Cytochrome c oxidase subunit 4 isoform 1, mitochondrial	5	2	5	1.8	5	2	5	2	5	2	5	1.8	5	1.8	5	2	5	1.8	45	9
P20674	COX5A	Cytochrome c oxidase subunit 5A, mitochondrial	0	0	1	0.2	0	0	0	0	0	0	1	0.2	1	0.2	1	0.4	1	0.4	5	5
H0UI06	COX7A2	Cytochrome c oxidase subunit 7A2, mitochondrial	1	0.4	0	0	0	0	0	0	0	0	0	0	0	0	0	0	0	0	1	1
A0A3B3ITX0	COX7B	Cytochrome c oxidase subunit 7B, mitochondrial	1	0.2	0	0	0	0	0	0	0	0	0	0	0	0	0	0	0	0	1	1
A0A087WSY5	CPB2	Carboxypeptidase B2	0	0	0	0	0	0	0	0	0	0	0	0	1	0.2	0	0	0	0	1	1
H3BNC9	CPEB1	Uncharacterized protein	1	0.2	2	0.6	2	0.8	1	0.4	3	1.2	1	0.4	1	0.4	4	2	3	1	18	9
B7Z7B0	CPSF4	Cleavage and polyadenylation-specificity factor subunit 4	0	0	0	0	0	0	0	0	0	0	1	0.2	0	0	0	0	0	0	1	1
Q16630	CPSF6	Cleavage and polyadenylation specificity factor subunit 6	1	0.2	2	0.4	1	0.2	0	0	5	1.2	1	0.2	0	0	2	0.4	1	0.2	13	7
P17927	CR1	Complement receptor type 1	1	0.2	0	0	0	0	0	0	0	0	0	0	0	0	0	0	0	0	1	1
Q2VPA4	CR1L	Complement component receptor 1-like protein	0	0	1	0.2	0	0	0	0	0	0	0	0	0	0	0	0	0	0	1	1
P52943	CRIP2	Cysteine-rich protein 2	1	0.4	3	0.8	5	1.2	1	0.2	2	0.4	0	0	3	0.8	3	0.8	2	0.6	20	8
H0YK64	CRTC3	CREB-regulated transcription coactivator 3 (Fragment)	1	0.2	0	0	0	0	0	0	0	0	0	0	0	0	0	0	0	0	1	1
P55060	CSE1L	Exportin-2	1	0.4	1	0.4	0	0	1	0.2	0	0	0	0	3	1	3	1.2	0	0	9	5
P04141	CSF2	Granulocyte-macrophage colony-stimulating factor	0	0	0	0	0	0	0	0	1	0.2	0	0	0	0	0	0	0	0	1	1
Q7Z407	CSMD3	CUB and sushi domain-containing protein 3	0	0	0	0	0	0	0	0	0	0	0	0	0	0	0	0	2	0.4	2	1
Q1MSJ5	CSPP1	Centrosome and spindle pole-associated protein 1	0	0	0	0	0	0	0	0	2	0.4	0	0	0	0	1	0.2	0	0	3	2
P21291	CSRP1	Cysteine and glycine-rich protein 1	4	4.8	5	7	5	5.6	5	6	5	4.6	5	8.2	5	4.6	5	2.8	5	6	44	9
P04080	CSTB	Cystatin-B	3	1.4	1	0.4	4	1.6	3	1.4	3	1.4	4	3.2	3	1	4	1.8	4	3.2	29	9
P35221	CTNNA1	Catenin alpha-1	5	5	5	5.8	5	5.6	5	3.8	5	6	5	4.4	5	2.4	5	4.8	5	4.6	45	9
A0A2R8Y5A3	CTNNB1	Catenin beta-1	0	0	0	0	0	0	1	0.2	0	0	0	0	0	0	3	0.6	1	0.2	5	3
O60716	CTNND1	Catenin delta-1	0	0	1	0.2	0	0	0	0	0	0	2	0.4	0	0	0	0	0	0	3	2
E9PHB5	CTNND2	Catenin delta-2	0	0	0	0	0	0	0	0	0	0	0	0	0	0	1	0.2	0	0	1	1
P07858	CTSB	Cathepsin B	5	7.6	5	6.4	5	3.8	5	4.4	5	4	5	4	5	2.8	5	4	5	4	45	9
A0A1B0GU03	CTSD	Peptidase A1 domain-containing protein	0	0	1	0.2	0	0	0	0	1	0.4	0	0	0	0	0	0	0	0	2	2
Q14247	CTTN	Src substrate cortactin	0	0	0	0	0	0	0	0	0	0	0	0	0	0	0	0	1	0.4	1	1
O60494	CUBN	Cubilin	0	0	0	0	1	0.2	0	0	0	0	1	0.2	0	0	0	0	0	0	2	2
Q13618	CUL3	Cullin-3	0	0	0	0	0	0	0	0	0	0	0	0	0	0	0	0	1	0.2	1	1
Q13620	CUL4B	Cullin-4B	0	0	0	0	0	0	0	0	1	0.2	0	0	0	0	0	0	0	0	1	1
Q93034	CUL5	Cullin-5	0	0	0	0	2	1	0	0	1	0.2	1	0.4	0	0	0	0	0	0	4	3
Q86UP6	CUZD1	CUB and zona pellucida-like domain-containing protein 1	0	0	0	0	0	0	1	0.2	1	0.2	0	0	0	0	0	0	0	0	2	2
P78310	CXADR	Coxsackievirus and adenovirus receptor	0	0	1	0.2	0	0	0	0	0	0	0	0	1	0.4	0	0	0	0	2	2
A0A499FJ32	CYB5B	Cytochrome b5 type B	0	0	1	0.2	0	0	1	0.2	1	0.2	0	0	1	0.2	1	0.2	1	0.2	6	6
P00387	CYB5R3	NADH-cytochrome b5 reductase 3	1	0.2	0	0	0	0	0	0	1	0.2	1	0.2	0	0	0	0	0	0	3	3
P99999	CYCS	Cytochrome c	2	0.8	3	2	3	1.6	3	1.6	1	0.8	3	2	1	0.4	4	1.8	4	2.4	24	9
C9JA26	CYP3A43	Cytochrome P450 3A43	1	0.2	0	0	0	0	0	0	0	0	0	0	0	0	0	0	0	0	1	1
P22680	CYP7A1	Cytochrome P450 7A1	1	0.2	0	0	0	0	0	0	0	0	0	0	0	0	0	0	0	0	1	1
Q9H0Q0	CYRIA	CYFIP-related Rac1 interactor A	1	0.2	0	0	0	0	0	0	0	0	0	0	0	0	0	0	0	0	1	1
Q9Y4D1	DAAM1	Disheveled-associated activator of morphogenesis 1	0	0	1	0.2	0	0	0	0	0	0	0	0	0	0	0	0	0	0	1	1
A0A0A0MTI5	DBI	Acyl-CoA-binding protein	0	0	0	0	1	0.4	0	0	0	0	0	0	1	0.4	0	0	0	0	2	2
Q16643	DBN1	Drebrin	3	1.2	2	0.8	1	0.2	1	0.4	2	0.8	1	0.4	0	0	1	0.2	2	0.8	13	8
F8WBB2	DBNL	Drebrin-like protein	0	0	0	0	0	0	0	0	0	0	0	0	1	0.2	0	0	1	0.2	2	2
Q6ZNG2	DBX2	Homeobox protein DBX2	0	0	0	0	0	0	0	0	1	0.2	0	0	0	0	0	0	0	0	1	1
V9GYZ9	DCAF8	DDB1- and CUL4-associated factor 8 (Fragment)	0	0	0	0	0	0	0	0	0	0	0	0	0	0	0	0	1	0.2	1	1
Q96PD2	DCBLD2	Discoidin, CUB and LCCL domain-containing protein 2	2	0.4	0	0	0	0	0	0	0	0	0	0	0	0	0	0	0	0	2	1
P32321	DCTD	Deoxycytidylate deaminase	0	0	0	0	0	0	0	0	0	0	0	0	1	0.2	0	0	0	0	1	1
Q7Z4W1	DCXR	L-xylulose reductase	0	0	0	0	1	0.2	0	0	0	0	1	0.2	0	0	0	0	0	0	2	2
P39656	DDOST	Dolichyl-diphosphooligosaccharide--protein glycosyltransferase 48 kDa subunit	3	1	2	0.4	4	1.8	3	0.8	5	1.8	5	1.8	3	0.8	4	1	5	1.4	34	9
Q92499	DDX1	ATP-dependent RNA helicase DDX1	0	0	0	0	0	0	0	0	0	0	1	0.2	0	0	0	0	0	0	1	1
F5GXL6	DDX11	ATP-dependent DNA helicase DDX11 (Fragment)	0	0	0	0	0	0	1	0.2	0	0	0	0	0	0	0	0	0	0	1	1
A0A1W2PQ51	DDX17	Probable ATP-dependent RNA helicase DDX17	2	0.6	5	1.6	4	1	4	1	2	0.8	2	0.4	5	1.4	2	0.6	3	1.2	29	9
Q13838	DDX39B	Spliceosome RNA helicase DDX39B	2	0.6	2	0.4	0	0	2	0.8	1	0.2	1	0.4	1	0.2	1	0.2	1	0.4	11	8
A0A0D9SF53	DDX3X	ATP-dependent RNA helicase DDX3X	0	0	0	0	3	1	4	1	1	0.2	2	0.4	2	0.6	1	0.2	2	0.4	15	7
O75398	DEAF1	Deformed epidermal autoregulatory factor 1 homolog	0	0	0	0	0	0	0	0	0	0	0	0	0	0	0	0	1	0.2	1	1
Q16698	DECR1	2,4-dienoyl-CoA reductase, mitochondrial	2	0.8	2	0.8	1	0.4	0	0	1	0.4	3	1.2	1	0.4	1	0.4	0	0	11	7
Q30KR1	DEFB109B	Putative beta-defensin 109B	0	0	1	0.2	0	0	0	0	0	0	0	0	0	0	0	0	0	0	1	1
Q9ULE3	DENND2A	DENN domain-containing protein 2A	0	0	0	0	0	0	0	0	1	0.2	0	0	0	0	0	0	0	0	1	1
E9PF32	DENND3	DENN domain-containing protein 3	0	0	1	0.2	0	0	0	0	0	0	0	0	0	0	0	0	0	0	1	1
O75064	DENND4B	DENN domain-containing protein 4B	0	0	0	0	0	0	0	0	0	0	0	0	1	0.2	0	0	0	0	1	1
Q9NTK1	DEPP1	Protein DEPP1	0	0	0	0	0	0	1	0.2	0	0	0	0	0	0	0	0	0	0	1	1
Q5KSL6	DGKK	Diacylglycerol kinase kappa	0	0	1	0.2	0	0	0	0	0	0	0	0	0	0	0	0	0	0	1	1
Q13574	DGKZ	Diacylglycerol kinase zeta	0	0	0	0	0	0	1	0.2	0	0	0	0	0	0	0	0	0	0	1	1
Q7Z3D6	DGLUCY	D-glutamate cyclase, mitochondrial	0	0	0	0	0	0	2	0.4	0	0	0	0	1	0.2	0	0	0	0	3	2
O75911	DHRS3	Short-chain dehydrogenase/reductase 3	0	0	0	0	0	0	0	0	0	0	0	0	1	0.2	0	0	0	0	1	1
O43143	DHX15	Pre-mRNA-splicing factor ATP-dependent RNA helicase DHX15	0	0	0	0	0	0	0	0	0	0	1	0.2	0	0	0	0	0	0	1	1
Q14147	DHX34	Probable ATP-dependent RNA helicase DHX34	0	0	1	0.2	0	0	0	0	0	0	0	0	0	0	0	0	0	0	1	1
Q08211	DHX9	ATP-dependent RNA helicase A	0	0	0	0	0	0	0	0	1	0.2	0	0	0	0	0	0	0	0	1	1
A0A494C143	DIP2A	Disco-interacting protein 2 homolog A	0	0	0	0	0	0	0	0	1	0.2	0	0	0	0	0	0	0	0	1	1
Q5T7M9	DIPK1A	Divergent protein kinase domain 1A	0	0	1	0.2	0	0	0	0	0	0	0	0	0	0	0	0	0	0	1	1
Q0P6D2	DIPK1C	Divergent protein kinase domain 1C	0	0	0	0	0	0	0	0	0	0	0	0	1	0.2	0	0	0	0	1	1
Q8TF46	DIS3L	DIS3-like exonuclease 1	0	0	0	0	0	0	0	0	0	0	0	0	0	0	0	0	1	0.2	1	1
A7MBM2	DISP2	Protein dispatched homolog 2	1	0.2	0	0	0	0	0	0	0	0	0	0	0	0	0	0	0	0	1	1
Q96QB1	DLC1	Rho GTPase-activating protein 7	0	0	0	0	0	0	0	0	0	0	0	0	0	0	1	0.4	0	0	1	1
Q5JUW8	DLG3	Discs, large homolog 3 (Neuroendocrine-dlg, Drosophila), isoform CRA_b	0	0	1	0.2	0	0	0	0	0	0	0	0	0	0	0	0	0	0	1	1
Q96GE9	DMAC1	Distal membrane-arm assembly complex protein 1	0	0	0	0	0	0	0	0	0	0	0	0	0	0	0	0	1	0.4	1	1
M0R333	DMPK	Myotonin-protein kinase	0	0	0	0	1	0.2	0	0	0	0	0	0	0	0	0	0	0	0	1	1
F5H269	DMXL1	DmX-like protein 1	0	0	0	0	1	0.2	0	0	0	0	0	0	0	0	0	0	1	0.2	2	2
Q8TD57	DNAH3	Dynein heavy chain 3, axonemal	0	0	0	0	0	0	0	0	1	0.2	0	0	0	0	0	0	0	0	1	1
Q8TE73	DNAH5	Dynein heavy chain 5, axonemal	0	0	0	0	1	0.2	0	0	0	0	0	0	0	0	0	0	0	0	1	1
Q9C0G6	DNAH6	Dynein heavy chain 6, axonemal	0	0	0	0	0	0	0	0	0	0	1	0.2	0	0	0	0	1	0.2	2	2
A0A075B6F3	DNAH8	Dynein heavy chain 8, axonemal	0	0	0	0	1	0.2	0	0	0	0	0	0	0	0	0	0	0	0	1	1
Q9NYC9	DNAH9	Dynein heavy chain 9, axonemal	0	0	0	0	0	0	0	0	0	0	0	0	2	0.6	0	0	0	0	2	1
P31689	DNAJA1	DnaJ homolog subfamily A member 1	0	0	1	0.2	1	0.2	0	0	1	0.4	1	0.2	1	0.2	1	0.2	3	0.8	9	7
Q9UBS4	DNAJB11	DnaJ homolog subfamily B member 11	0	0	0	0	0	0	0	0	1	0.2	0	0	0	0	0	0	0	0	1	1
H0YLV4	DNAJC17	DnaJ homolog subfamily C member 17	0	0	0	0	0	0	1	0.2	0	0	0	0	0	0	0	0	0	0	1	1
A0A499FIY3	DNALI1	Axonemal dynein light intermediate polypeptide 1	0	0	0	0	0	0	0	0	0	0	1	0.2	0	0	0	0	0	0	1	1
Q96M86	DNHD1	Dynein heavy chain domain-containing protein 1	0	0	0	0	0	0	1	0.2	1	0.2	0	0	0	0	0	0	0	0	2	2
A0A0D9SFE4	DNM1	Dynamin-1	0	0	0	0	0	0	0	0	0	0	0	0	0	0	1	0.2	0	0	1	1
Q6XZF7	DNMBP	Dynamin-binding protein	1	0.2	1	0.2	4	0.8	0	0	1	0.2	3	0.6	3	0.6	3	0.8	3	1	19	8
K7EJL0	DNMT1	DNA (cytosine-5)-methyltransferase 1 (Fragment)	0	0	0	0	0	0	1	0.2	0	0	0	0	0	0	0	0	0	0	1	1
Q14184	DOC2B	Double C2-like domain-containing protein beta	0	0	0	0	0	0	0	0	0	0	1	0.2	0	0	0	0	0	0	1	1
Q8NF50	DOCK8	Dedicator of cytokinesis protein 8	0	0	0	0	0	0	0	0	1	0.2	0	0	0	0	0	0	0	0	1	1
Q5JUD8	DOCK9	Dedicator of cytokinesis protein 9 (Fragment)	0	0	1	0.2	0	0	0	0	0	0	1	0.2	0	0	0	0	0	0	2	2
Q5TA12	DOP1A	Protein dopey-1	0	0	0	0	1	0.2	0	0	0	0	0	0	0	0	0	0	0	0	1	1
Q9Y3R5	DOP1B	Protein dopey-2	0	0	0	0	1	0.2	0	0	0	0	0	0	0	0	0	0	0	0	1	1
Q9UHL4	DPP7	Dipeptidyl peptidase 2	0	0	0	0	0	0	1	0.2	0	0	0	0	0	0	0	0	0	0	1	1
Q6V1X1	DPP8	Dipeptidyl peptidase 8	0	0	0	0	1	0.2	0	0	0	0	0	0	0	0	0	0	0	0	1	1
Q86TI2	DPP9	Dipeptidyl peptidase 9	0	0	0	0	0	0	0	0	0	0	0	0	0	0	1	0.2	0	0	1	1
Q7Z388	DPY19L4	Probable C-mannosyltransferase DPY19L4	0	0	0	0	1	0.2	0	0	0	0	0	0	0	0	0	0	0	0	1	1
Q9C005	DPY30	Protein dpy-30 homolog	0	0	1	0.4	0	0	1	0.4	0	0	0	0	0	0	1	0.2	3	1.2	6	4
A0A1C7CYX9	DPYSL2	Dihydropyrimidinase-related protein 2	4	3	5	3.6	5	6.2	5	4.4	5	6	5	5.8	5	5.6	5	6	5	5.6	44	9
Q14195	DPYSL3	Dihydropyrimidinase-related protein 3	1	0.4	1	0.4	1	0.4	0	0	1	0.4	2	0.8	2	0.8	1	0.4	0	0	9	7
Q9BPU6	DPYSL5	Dihydropyrimidinase-related protein 5	0	0	0	0	0	0	0	0	0	0	0	0	1	0.2	0	0	0	0	1	1
Q8IY82	DRC7	Dynein regulatory complex subunit 7	1	0.2	0	0	0	0	0	0	0	0	0	0	0	0	0	0	0	0	1	1
A0A494C1D7	DST	Dystonin (Fragment)	0	0	0	0	0	0	0	0	0	0	0	0	0	0	1	0.2	0	0	1	1
P60981	DSTN	Destrin	2	0.6	1	0.2	2	0.8	2	1	0	0	3	1.6	2	0.8	1	0.4	1	0.4	14	8
Q96FN9	DTD2	D-aminoacyl-tRNA deacylase 2	0	0	0	0	0	0	0	0	0	0	0	0	0	0	0	0	1	0.2	1	1
Q8N9I9	DTX3	Probable E3 ubiquitin-protein ligase DTX3	0	0	0	0	1	0.2	0	0	0	0	0	0	0	0	0	0	0	0	1	1
Q8TDB6	DTX3L	E3 ubiquitin-protein ligase DTX3L	0	0	0	0	0	0	0	0	0	0	1	0.2	0	0	0	0	0	0	1	1
I3L0Z8	DVL2	Segment polarity protein dishevelled homolog DVL-2 (Fragment)	0	0	0	0	0	0	1	0.2	0	0	0	0	0	0	0	0	0	0	1	1
Q14204	DYNC1H1	Cytoplasmic dynein 1 heavy chain 1	2	1.2	4	2.2	3	0.8	5	2.6	4	3.8	1	0.4	3	1.4	1	0.4	4	1.2	27	9
O43237	DYNC1LI2	Cytoplasmic dynein 1 light intermediate chain 2	2	0.8	3	1.2	0	0	2	0.8	2	0.8	1	0.4	2	0.8	2	0.8	1	0.4	15	8
P63167	DYNLL1	Dynein light chain 1, cytoplasmic	1	0.4	0	0	2	1.2	2	0.8	0	0	1	0.8	0	0	2	1	2	0.8	10	6
V9GY46	DZANK1	Double zinc ribbon and ankyrin repeat-containing protein 1	0	0	0	0	0	0	0	0	1	0.2	0	0	0	0	0	0	0	0	1	1
Q8IYY4	DZIP1L	Zinc finger protein DZIP1L	0	0	0	0	0	0	0	0	0	0	0	0	1	0.4	0	0	0	0	1	1
Q15125	EBP	3-beta-hydroxysteroid-Delta(8),Delta(7)-isomerase	2	0.8	5	2.4	3	1.2	3	2.2	1	0.8	3	1.6	3	1.2	4	2.4	3	1.6	27	9
A0A3B3ISF9	ECE1	Endothelin-converting enzyme 1	1	0.2	0	0	0	0	0	0	0	0	0	0	0	0	0	0	0	0	1	1
P30084	ECHS1	Enoyl-CoA hydratase, mitochondrial	0	0	3	1	0	0	1	0.4	1	0.4	2	0.8	2	0.6	1	0.4	2	0.6	12	7
O75521	ECI2	Enoyl-CoA delta isomerase 2, mitochondrial	0	0	0	0	0	0	0	0	0	0	0	0	1	0.2	0	0	0	0	1	1
Q14507	EDDM3A	Epididymal secretory protein E3-alpha	0	0	1	0.2	0	0	0	0	0	0	0	0	0	0	0	0	0	0	1	1
Q9BZQ6	EDEM3	ER degradation-enhancing alpha-mannosidase-like protein 3	0	0	0	0	0	0	0	0	0	0	0	0	0	0	0	0	1	0.2	1	1
O43854	EDIL3	EGF-like repeat and discoidin I-like domain-containing protein 3	0	0	0	0	1	0.2	0	0	0	0	0	0	0	0	0	0	0	0	1	1
P25101	EDNRA	Endothelin-1 receptor	1	0.2	0	0	0	0	0	0	0	0	0	0	0	0	0	0	0	0	1	1
Q15075	EEA1	Early endosome antigen 1	0	0	1	0.4	0	0	0	0	0	0	0	0	0	0	0	0	0	0	1	1
P68104	EEF1A1	Elongation factor 1-alpha 1	5	38.8	5	40.6	5	39	5	41	5	41.8	5	45.6	5	43.2	5	42.4	5	43.4	45	9
F8VZI8	EEF1AKMT3	EEF1A lysine methyltransferase 3	0	0	1	0.2	0	0	0	0	0	0	0	0	0	0	0	0	0	0	1	1
P24534	EEF1B2	Elongation factor 1-beta	3	1.2	4	2	2	0.6	3	1.6	4	2	5	2.6	2	0.6	3	1.8	4	3	30	9
E9PRY8	EEF1D	Elongation factor 1-delta	5	2.6	5	2.2	4	2	4	2.2	4	3	5	4.2	5	2.2	4	3.6	5	4.6	41	9
P26641	EEF1G	Elongation factor 1-gamma	5	3.8	5	2.6	5	2.8	5	3.4	5	3	5	2.4	5	4.2	5	2.6	3	1.6	43	9
P13639	EEF2	Elongation factor 2	5	16.4	5	10	5	10.2	5	11	5	12	5	10.6	5	8	5	10	5	12.6	45	9
Q7Z2Z2	EFL1	Elongation factor-like GTPase 1	0	0	0	0	0	0	0	0	0	0	0	0	1	0.2	0	0	0	0	1	1
Q15029	EFTUD2	116 kDa U5 small nuclear ribonucleoprotein component	0	0	1	0.2	0	0	0	0	0	0	0	0	0	0	0	0	0	0	1	1
Q9NZN4	EHD2	EH domain-containing protein 2	3	0.8	3	1.8	5	4	3	1.2	3	1.6	4	3.6	2	0.6	5	3.4	5	4	33	9
Q9H223	EHD4	EH domain-containing protein 4	0	0	0	0	0	0	0	0	0	0	1	0.2	0	0	0	0	0	0	1	1
Q8N9N8	EIF1AD	Probable RNA-binding protein EIF1AD	0	0	1	0.4	0	0	0	0	0	0	0	0	0	0	0	0	0	0	1	1
P19525	EIF2AK2	Interferon-induced, double-stranded RNA-activated protein kinase	0	0	0	0	0	0	1	0.2	0	0	0	0	0	0	0	0	0	0	1	1
E7ERK9	EIF2B4	Translation initiation factor eIF-2B subunit delta	1	0.4	0	0	0	0	0	0	1	0.2	0	0	0	0	0	0	1	0.2	3	3
P55884	EIF3B	Eukaryotic translation initiation factor 3 subunit B	1	0.2	3	0.8	1	0.2	1	0.4	1	0.2	0	0	2	0.6	1	0.4	2	0.6	12	8
P60228	EIF3E	Eukaryotic translation initiation factor 3 subunit E	0	0	0	0	1	0.2	0	0	0	0	0	0	0	0	0	0	0	0	1	1
O00303	EIF3F	Eukaryotic translation initiation factor 3 subunit F	0	0	4	1.8	4	1.8	0	0	2	0.6	3	1.4	0	0	4	1.8	4	1.4	21	6
B3KS98	EIF3H	Eukaryotic translation initiation factor 3 subunit H	0	0	0	0	0	0	0	0	0	0	0	0	0	0	1	0.4	0	0	1	1
Q7L2H7	EIF3M	Eukaryotic translation initiation factor 3 subunit M	0	0	1	0.2	0	0	1	0.2	0	0	0	0	0	0	1	0.2	0	0	3	3
P60842	EIF4A1	Eukaryotic initiation factor 4A-I	5	4.2	5	7.8	5	9.2	5	6.2	5	8.4	5	8.6	5	9.2	5	7.8	5	8	45	9
Q14240	EIF4A2	Eukaryotic initiation factor 4A-II	2	1.6	3	1.6	2	0.8	3	2.2	2	1.2	3	1.8	3	2.8	2	1.8	1	0.8	21	9
Q04637	EIF4G1	Eukaryotic translation initiation factor 4 gamma 1	1	0.4	0	0	2	0.6	2	0.6	1	0.2	0	0	0	0	0	0	0	0	6	4
Q15056	EIF4H	Eukaryotic translation initiation factor 4H	5	3.8	5	6	5	3.2	5	4.4	5	3.8	5	2.6	5	2.6	5	3.6	5	3.6	45	9
P63241	EIF5A	Eukaryotic translation initiation factor 5A-1	5	3.8	5	3.2	5	4.2	5	4.4	5	3.6	5	4.6	5	4.4	5	3.6	5	5.6	45	9
P56537	EIF6	Eukaryotic translation initiation factor 6	0	0	1	0.2	0	0	0	0	0	0	0	0	0	0	0	0	0	0	1	1
V9GZ72	ELAC2	Zinc phosphodiesterase ELAC protein 2	0	0	1	0.2	0	0	0	0	0	0	0	0	0	0	0	0	0	0	1	1
P41970	ELK3	ETS domain-containing protein Elk-3	0	0	1	0.2	0	0	0	0	0	0	0	0	0	0	0	0	0	0	1	1
Q8N766	EMC1	ER membrane protein complex subunit 1	0	0	0	0	0	0	0	0	0	0	0	0	0	0	0	0	1	0.2	1	1
B0QYK2	EMID1	EMI domain-containing protein 1 (Fragment)	0	0	1	0.2	0	0	0	0	0	0	0	0	0	0	0	0	0	0	1	1
Q9NT22	EMILIN3	EMILIN-3	0	0	0	0	0	0	0	0	0	0	0	0	0	0	1	0.2	0	0	1	1
Q05BV3	EML5	Echinoderm microtubule-associated protein-like 5	0	0	0	0	0	0	0	0	1	0.2	0	0	0	0	0	0	0	0	1	1
Q7Z589	EMSY	BRCA2-interacting transcriptional repressor EMSY	0	0	0	0	0	0	1	0.2	0	0	0	0	0	0	0	0	0	0	1	1
A0A075B6E5	ENAH	Protein enabled homolog (Fragment)	0	0	0	0	0	0	0	0	1	0.2	0	0	0	0	0	0	0	0	1	1
Q9NRM1	ENAM	Enamelin	0	0	0	0	1	0.2	0	0	0	0	0	0	0	0	0	0	0	0	1	1
A0A2R8Y6G6	ENO1	Alpha-enolase	5	19.8	5	17.4	5	19.4	5	22.6	5	20.4	5	22.8	5	20	5	19	5	20.8	45	9
P09104	ENO2	Gamma-enolase	2	1.8	3	1.2	2	1	3	1	1	0.2	3	1.4	3	1	2	0.6	2	0.6	21	9
O14638	ENPP3	Ectonucleotide pyrophosphatase/phosphodiesterase family member 3	0	0	0	0	0	0	1	0.2	0	0	0	0	0	0	0	0	0	0	1	1
Q8IYW4	ENTHD1	ENTH domain-containing protein 1	0	0	0	0	0	0	0	0	1	0.2	0	0	0	0	0	0	0	0	1	1
Q09472	EP300	Histone acetyltransferase p300	1	0.2	0	0	0	0	0	0	0	0	0	0	0	0	0	0	0	0	1	1
P11171	EPB41	Protein 4.1	0	0	0	0	0	0	0	0	0	0	0	0	1	0.2	0	0	0	0	1	1
Q6ZSX4	EPB41L2	Band 4.1-like protein 2	1	0.2	1	0.2	0	0	0	0	0	0	0	0	0	0	0	0	0	0	2	2
J3QLU5	EPB41L3	Band 4.1-like protein 3 (Fragment)	0	0	0	0	0	0	0	0	0	0	0	0	1	0.4	0	0	0	0	1	1
Q52LR7	EPC2	Enhancer of polycomb homolog 2	0	0	1	0.2	0	0	0	0	0	0	0	0	0	0	0	0	0	0	1	1
A0A0B4J1T8	EPHA6	Ephrin type-A receptor 6	0	0	0	0	0	0	0	0	0	0	0	0	0	0	0	0	1	0.2	1	1
P07099	EPHX1	Epoxide hydrolase 1	0	0	0	0	0	0	0	0	0	0	1	0.2	0	0	0	0	0	0	1	1
P07814	EPRS1	Bifunctional glutamate/proline--tRNA ligase	1	0.4	1	0.2	0	0	0	0	0	0	1	0.4	0	0	0	0	2	0.4	5	4
P11678	EPX	Eosinophil peroxidase	0	0	0	0	0	0	1	0.2	0	0	0	0	0	0	0	0	0	0	1	1
Q9NZ08	ERAP1	Endoplasmic reticulum aminopeptidase 1	0	0	0	0	0	0	0	0	0	0	1	0.2	0	0	0	0	0	0	1	1
H0Y5K5	ERGIC3	Endoplasmic reticulum-Golgi intermediate compartment protein 3 (Fragment)	0	0	0	0	1	0.2	0	0	0	0	0	0	0	0	0	0	0	0	1	1
Q7Z2K6	ERMP1	Endoplasmic reticulum metallopeptidase 1	0	0	0	0	0	0	0	0	0	0	0	0	0	0	0	0	1	0.2	1	1
O75460	ERN1	Serine/threonine-protein kinase/endoribonuclease IRE1	0	0	1	0.2	0	0	0	0	0	0	0	0	0	0	0	0	0	0	1	1
Q9BS26	ERP44	Endoplasmic reticulum resident protein 44	0	0	1	0.2	0	0	0	0	0	0	0	0	0	0	0	0	0	0	1	1
Q9HDB9	ERVK-5	Endogenous retrovirus group K member 5 Gag polyprotein	0	0	2	0.6	1	0.2	1	0.2	0	0	0	0	0	0	1	0.2	1	0.2	6	5
U3KQT1	ESD	S-formylglutathione hydrolase (Fragment)	0	0	0	0	0	0	1	0.2	0	0	0	0	0	0	0	0	0	0	1	1
Q9BSJ8	ESYT1	Extended synaptotagmin-1	0	0	0	0	0	0	0	0	0	0	0	0	0	0	1	0.2	1	0.2	2	2
P62495	ETF1	Eukaryotic peptide chain release factor subunit 1	1	0.4	0	0	0	0	0	0	0	0	0	0	1	0.4	1	0.4	0	0	3	3
P13804	ETFA	Electron transfer flavoprotein subunit alpha, mitochondrial	5	6.4	5	6.8	5	6	5	5.2	5	6	5	6.8	5	4.8	5	4.4	5	4.4	45	9
P34910	EVI2B	Protein EVI2B	0	0	0	0	1	0.4	0	0	0	0	0	0	0	0	0	0	0	0	1	1
Q9UI08	EVL	Ena/VASP-like protein	0	0	0	0	0	0	0	0	0	0	0	0	0	0	1	0.2	0	0	1	1
P49640	EVX1	Homeobox even-skipped homolog protein 1	0	0	0	0	0	0	0	0	0	0	1	0.2	0	0	0	0	0	0	1	1
O60645	EXOC3	Exocyst complex component 3	0	0	1	0.2	0	0	1	0.2	2	0.4	1	0.2	0	0	0	0	0	0	5	4
Q8TAG9	EXOC6	Exocyst complex component 6	0	0	0	0	0	0	0	0	0	0	0	0	0	0	1	0.2	0	0	1	1
Q9UPT5	EXOC7	Exocyst complex component 7	0	0	1	0.2	0	0	0	0	0	0	0	0	0	0	0	0	0	0	1	1
Q93063	EXT2	Exostosin-2	0	0	0	0	0	0	1	0.2	0	0	0	0	0	0	0	0	0	0	1	1
F2Z2Y1	EYA4	Eyes absent homolog	1	0.2	0	0	0	0	0	0	0	0	0	0	0	0	0	0	0	0	1	1
E7EQR4	EZR	Ezrin	5	9	5	7.8	5	9.6	5	9.6	5	7.8	5	7.4	5	5.8	5	7	5	7.4	45	9
P00742	F10	Coagulation factor X	1	0.2	0	0	0	0	0	0	0	0	0	0	0	0	0	0	0	0	1	1
Q6GMR7	FAAH2	Fatty-acid amide hydrolase 2	0	0	1	0.2	0	0	0	0	0	0	0	0	0	0	0	0	0	0	1	1
Q01469	FABP5	Fatty acid-binding protein 5	0	0	2	1.6	2	0.8	2	0.8	2	0.8	3	1.2	1	0.4	2	0.8	2	0.8	16	8
Q9UNN5	FAF1	FAS-associated factor 1	1	0.2	1	0.4	0	0	0	0	0	0	0	0	0	0	0	0	0	0	2	2
P16930	FAH	Fumarylacetoacetase	0	0	0	0	0	0	0	0	0	0	1	0.4	0	0	0	0	0	0	1	1
Q96PZ2	FAM111A	Protein FAM111A	0	0	0	0	0	0	0	0	1	0.2	0	0	0	0	0	0	0	0	1	1
Q9BYI3	FAM126A	Hyccin	0	0	0	0	1	0.2	0	0	0	0	0	0	0	0	0	0	0	0	1	1
B1AL88	FAM155A	Transmembrane protein FAM155A	0	0	1	0.4	0	0	0	0	0	0	0	0	0	0	0	0	0	0	1	1
Q86V87	FAM160B2	Protein FAM160B2	0	0	0	0	0	0	1	0.2	0	0	0	0	0	0	0	0	0	0	1	1
Q96PV7	FAM193B	Protein FAM193B	0	0	0	0	0	0	0	0	1	0.2	0	0	0	0	0	0	0	0	1	1
Q32MH5	FAM214A	Protein FAM214A	0	0	0	0	1	0.2	0	0	0	0	0	0	0	0	0	0	0	0	1	1
Q7L5A3	FAM214B	Protein FAM214B	0	0	0	0	0	0	0	0	0	0	0	0	0	0	0	0	1	0.2	1	1
A0A0A0MRW0	FAM219A	Protein FAM219A	0	0	0	0	0	0	0	0	0	0	0	0	0	0	0	0	1	0.2	1	1
Q96M60	FAM227B	Protein FAM227B	0	0	0	0	0	0	0	0	0	0	0	0	1	0.2	0	0	0	0	1	1
Q8N9W8	FAM71D	Protein FAM71D	0	0	0	0	0	0	1	0.2	0	0	0	0	0	0	0	0	0	0	1	1
Q5HYJ3	FAM76B	Protein FAM76B	2	1.6	0	0	0	0	3	0.8	1	0.2	2	0.4	1	0.6	0	0	2	0.6	11	6
Q9Y2M0	FAN1	Fanconi-associated nuclease 1	0	0	0	0	1	0.2	1	0.2	0	0	0	0	1	0.2	0	0	0	0	3	3
P49327	FASN	Fatty acid synthase	0	0	0	0	0	0	0	0	1	0.2	0	0	0	0	0	0	1	0.2	2	2
A0A087WVP1	FAT1	Protocadherin Fat 1	0	0	0	0	0	0	0	0	0	0	1	0.2	0	0	0	0	0	0	1	1
Q8TDW7	FAT3	Protocadherin Fat 3	1	0.2	0	0	0	0	0	0	0	0	0	0	0	0	0	0	0	0	1	1
Q6V0I7	FAT4	Protocadherin Fat 4	0	0	0	0	0	0	0	0	0	0	0	0	1	0.4	0	0	0	0	1	1
Q53RD9	FBLN7	Fibulin-7	0	0	0	0	0	0	1	0.2	0	0	0	0	0	0	0	0	0	0	1	1
P35556	FBN2	Fibrillin-2	0	0	0	0	0	0	0	0	0	0	0	0	0	0	0	0	1	0.2	1	1
H3BRE6	FBRS	Probable fibrosin-1 (Fragment)	0	0	0	0	0	0	0	0	0	0	0	0	1	0.2	0	0	0	0	1	1
Q8N1E6	FBXL14	F-box/LRR-repeat protein 14	0	0	0	0	0	0	0	0	0	0	0	0	1	0.2	0	0	0	0	1	1
Q9UKT6	FBXL21P	Putative F-box/LRR-repeat protein 21	0	0	0	0	0	0	0	0	0	0	0	0	0	0	1	0.2	0	0	1	1
H3BMH7	FBXO31	Uncharacterized protein (Fragment)	0	0	0	0	0	0	0	0	0	0	0	0	0	0	2	0.4	0	0	2	1
Q8N4B4	FBXO39	F-box only protein 39	0	0	0	0	1	0.2	0	0	0	0	0	0	0	0	0	0	0	0	1	1
Q6PJ61	FBXO46	F-box only protein 46	0	0	0	0	0	0	0	0	0	0	0	0	0	0	0	0	1	0.2	1	1
Q5MNV8	FBXO47	F-box only protein 47	0	0	0	0	0	0	0	0	1	0.2	0	0	0	0	0	0	0	0	1	1
Q8N0W3	FCSK	L-fucose kinase	0	0	1	0.2	0	0	0	0	0	0	1	0.2	0	0	0	0	0	0	2	2
P14324	FDPS	Farnesyl pyrophosphate synthase	0	0	2	0.8	1	0.4	0	0	1	0.4	0	0	0	0	0	0	1	0.2	5	4
Q9BSK4	FEM1A	Protein fem-1 homolog A	0	0	0	0	0	0	0	0	0	0	0	0	0	0	0	0	1	0.2	1	1
Q92914	FGF11	Fibroblast growth factor 11	0	0	0	0	0	0	0	0	0	0	0	0	1	0.2	0	0	0	0	1	1
P07954	FH	Fumarate hydratase, mitochondrial	2	1	1	0.6	0	0	2	0.4	2	1.4	1	0.4	1	0.4	0	0	1	0.8	10	7
Q9BVA6	FICD	Protein adenylyltransferase FICD	1	0.2	0	0	0	0	0	0	0	0	0	0	0	0	0	0	2	0.4	3	2
Q5HY92	FIGN	Fidgetin	0	0	0	0	0	0	0	0	0	0	1	0.2	0	0	0	0	0	0	1	1
Q7Z7B0	FILIP1	Filamin-A-interacting protein 1	0	0	1	0.2	2	0.4	1	0.2	1	0.2	1	0.2	2	0.4	0	0	1	0.4	9	7
P62942	FKBP1A	Peptidyl-prolyl cis-trans isomerase FKBP1A	1	0.2	4	1.2	2	0.8	2	0.4	5	1.2	1	0.4	4	2.2	5	1.6	2	0.8	26	9
A0A494C0V6	FKBP2	Peptidyl-prolyl cis-trans isomerase FKBP2	1	0.2	0	0	0	0	0	0	0	0	0	0	0	0	0	0	0	0	1	1
Q02790	FKBP4	Peptidyl-prolyl cis-trans isomerase FKBP4	0	0	0	0	0	0	0	0	0	0	1	0.4	0	0	0	0	0	0	1	1
Q13451	FKBP5	Peptidyl-prolyl cis-trans isomerase FKBP5	0	0	0	0	0	0	0	0	1	0.2	0	0	0	0	0	0	0	0	1	1
Q14318	FKBP8	Peptidyl-prolyl cis-trans isomerase FKBP8	0	0	0	0	1	0.2	0	0	0	0	0	0	0	0	0	0	2	0.4	3	2
Q4G0T1	FLJ00268	Scavenger receptor cysteine-rich domain-containing protein SCART1	0	0	0	0	0	0	0	0	1	0.2	0	0	0	0	0	0	0	0	1	1
P21333	FLNA	Filamin-A	5	42.8	5	39.6	5	52.2	5	43.4	5	42.4	5	45.8	5	42.6	5	37.4	5	47.4	45	9
O75369	FLNB	Filamin-B	5	35.2	5	43.2	5	53.6	5	39.6	5	38.4	5	47.6	5	40.6	5	47.4	5	56.8	45	9
Q14315	FLNC	Filamin-C	1	0.2	2	0.6	0	0	2	0.6	2	0.4	1	0.2	1	0.2	3	1	3	1.4	15	8
O75955	FLOT1	Flotillin-1	0	0	0	0	0	0	0	0	1	0.2	1	0.2	0	0	0	0	0	0	2	2
O95466	FMNL1	Formin-like protein 1	0	0	1	0.2	0	0	0	0	0	0	0	0	1	0.2	1	0.2	0	0	3	3
Q9Y2H6	FNDC3A	Fibronectin type-III domain-containing protein 3A	0	0	0	0	1	0.2	0	0	0	0	0	0	0	0	0	0	0	0	1	1
C9JCN8	FOSL2	Fos-related antigen 2 (Fragment)	0	0	0	0	0	0	0	0	0	0	0	0	1	0.2	0	0	0	0	1	1
Q9UJU5	FOXD3	Forkhead box protein D3	0	0	0	0	0	0	0	0	0	0	0	0	1	0.4	1	0.2	0	0	2	2
Q86XX4	FRAS1	Extracellular matrix protein FRAS1	0	0	0	0	0	0	0	0	1	0.2	0	0	0	0	1	0.2	0	0	2	2
Q9Y2L6	FRMD4B	FERM domain-containing protein 4B	0	0	0	0	0	0	0	0	0	0	0	0	0	0	1	0.2	0	0	1	1
Q5SYB0	FRMPD1	FERM and PDZ domain-containing protein 1	0	0	0	0	0	0	0	0	0	0	0	0	1	0.2	0	0	0	0	1	1
A0A2R8Y5V8	FRY	Protein furry homolog	0	0	1	0.2	1	0.2	0	0	0	0	0	0	1	0.2	0	0	0	0	3	3
O94915	FRYL	Protein furry homolog-like	0	0	0	0	0	0	0	0	0	0	0	0	0	0	0	0	1	0.4	1	1
Q16658	FSCN1	Fascin	2	0.8	3	1	2	0.4	4	1	4	1	2	0.8	2	0.4	3	0.8	3	1	25	9
Q5CZC0	FSIP2	Fibrous sheath-interacting protein 2	1	0.2	0	0	0	0	0	0	0	0	0	0	0	0	0	0	0	0	1	1
Q9UET6	FTSJ1	Putative tRNA (cytidine(32)/guanosine(34)-2'-O)-methyltransferase	0	0	0	0	0	0	0	0	1	0.2	0	0	0	0	0	0	0	0	1	1
P09958	FURIN	Furin	0	0	0	0	0	0	0	0	0	0	0	0	1	0.4	0	0	0	0	1	1
H3BPE7	FUS	RNA-binding protein FUS	1	0.4	2	0.6	2	0.8	3	1.2	2	1	3	1	2	1.2	3	1.4	3	1	21	9
Q13467	FZD5	Frizzled-5	0	0	0	0	0	0	0	0	0	0	0	0	1	0.2	0	0	0	0	1	1
Q9UN86	G3BP2	Ras GTPase-activating protein-binding protein 2	2	0.8	3	0.8	4	1	4	1.2	3	1	2	0.4	5	1.2	4	1.2	4	1.4	31	9
P11413	G6PD	Glucose-6-phosphate 1-dehydrogenase	0	0	0	0	0	0	0	0	0	0	0	0	0	0	1	0.2	0	0	1	1
Q9BY60	GABARAPL3	Gamma-aminobutyric acid receptor-associated protein-like 3	0	0	0	0	0	0	0	0	1	0.2	0	0	0	0	0	0	0	0	1	1
P48169	GABRA4	Gamma-aminobutyric acid receptor subunit alpha-4	0	0	1	0.2	0	0	0	0	0	0	0	0	0	0	0	0	0	0	1	1
Q05329	GAD2	Glutamate decarboxylase 2	1	0.4	0	0	0	0	0	0	0	0	0	0	0	0	0	0	0	0	1	1
Q96C23	GALM	Aldose 1-epimerase	0	0	0	0	0	0	0	0	0	0	0	0	0	0	0	0	1	0.4	1	1
Q10472	GALNT1	Polypeptide N-acetylgalactosaminyltransferase 1	1	0.2	0	0	0	0	1	0.2	0	0	0	0	0	0	0	0	0	0	2	2
Q8IXK2	GALNT12	Polypeptide N-acetylgalactosaminyltransferase 12	0	0	0	0	0	0	0	0	0	0	0	0	0	0	0	0	1	0.2	1	1
Q86SF2	GALNT7	N-acetylgalactosaminyltransferase 7	0	0	0	0	0	0	1	0.2	0	0	0	0	0	0	0	0	0	0	1	1
Q9H2C0	GAN	Gigaxonin	0	0	0	0	0	0	0	0	0	0	2	0.4	0	0	0	0	0	0	2	1
Q14697	GANAB	Neutral alpha-glucosidase AB	3	2.6	5	2.6	4	4.6	5	3	4	1.8	4	2.6	4	3.2	4	4.2	4	4.2	37	9
P04406	GAPDH	Glyceraldehyde-3-phosphate dehydrogenase	5	54.6	5	69.2	5	51.8	5	51.4	5	54.6	5	60	5	71.2	5	55.2	5	64.6	45	9
P41250	GARS1	Glycine--tRNA ligase	0	0	0	0	0	0	0	0	1	0.6	0	0	0	0	0	0	0	0	1	1
Q8NHY3	GAS2L2	GAS2-like protein 2	0	0	0	0	1	0.2	0	0	0	0	0	0	0	0	0	0	0	0	1	1
A0A0G2JNZ0	GBA	Glucosylceramidase	0	0	0	0	1	0.2	0	0	0	0	0	0	0	0	0	0	0	0	1	1
Q9HCG7	GBA2	Non-lysosomal glucosylceramidase	0	0	0	0	0	0	0	0	0	0	1	0.2	0	0	0	0	0	0	1	1
Q9H0R5	GBP3	Guanylate-binding protein 3	0	0	0	0	0	0	0	0	1	0.2	2	0.8	0	0	0	0	0	0	3	2
O75600	GCAT	2-amino-3-ketobutyrate coenzyme A ligase, mitochondrial	0	0	1	0.2	0	0	0	0	1	0.2	0	0	0	0	0	0	0	0	2	2
I3L454	GCGR	Glucagon receptor	0	0	0	0	0	0	0	0	1	0.2	0	0	0	0	0	0	0	0	1	1
Q92616	GCN1	eIF-2-alpha kinase activator GCN1	2	0.4	2	0.4	2	0.6	0	0	2	0.4	3	0.8	1	0.2	0	0	3	0.6	15	7
O95395	GCNT3	Beta-1,3-galactosyl-O-glycosyl-glycoprotein beta-1,6-N-acetylglucosaminyltransferase 3	0	0	0	0	0	0	0	0	0	0	0	0	1	0.2	1	0.2	0	0	2	2
Q9P109	GCNT4	Beta-1,3-galactosyl-O-glycosyl-glycoprotein beta-1,6-N-acetylglucosaminyltransferase 4	0	0	0	0	1	0.2	0	0	0	0	0	0	0	0	0	0	0	0	1	1
P50395	GDI2	Rab GDP dissociation inhibitor beta	5	16.2	5	13	5	12	5	11.8	5	13.4	5	12.6	5	13.2	5	13.6	5	14.6	45	9
O43681	GET3	ATPase GET3	0	0	0	0	0	0	0	0	0	0	0	0	0	0	0	0	1	0.2	1	1
P19440	GGT1	Glutathione hydrolase 1 proenzyme	0	0	1	0.2	0	0	0	0	0	0	0	0	1	0.2	1	0.2	0	0	3	3
Q9NTQ9	GJB4	Gap junction beta-4 protein	0	0	0	0	0	0	0	0	0	0	1	0.2	0	0	0	0	0	0	1	1
Q9UKL4	GJD2	Gap junction delta-2 protein	0	0	1	0.2	0	0	0	0	0	0	0	0	0	0	0	0	0	0	1	1
Q6ZS86	GK5	Putative glycerol kinase 5	1	0.2	0	0	0	0	0	0	0	0	0	0	0	0	1	0.2	0	0	2	2
Q4G1C9	GLIPR1L2	GLIPR1-like protein 2	0	0	0	0	0	0	0	0	0	0	0	0	0	0	0	0	1	0.2	1	1
A0A088AWP7	GLIPR2	Golgi-associated plant pathogenesis-related protein 1	0	0	0	0	0	0	0	0	0	0	0	0	0	0	0	0	1	0.2	1	1
Q8NBF1	GLIS1	Zinc finger protein GLIS1	0	0	1	0.2	0	0	0	0	0	0	0	0	0	0	0	0	0	0	1	1
Q8WWB7	GLMP	Glycosylated lysosomal membrane protein	0	0	1	0.2	0	0	0	0	0	0	0	0	0	0	0	0	0	0	1	1
Q04760	GLO1	Lactoylglutathione lyase	0	0	0	0	0	0	0	0	0	0	1	0.4	0	0	0	0	0	0	1	1
F6TLX2	GLOD4	Glyoxalase domain-containing protein 4	0	0	0	0	0	0	0	0	1	0.4	0	0	0	0	0	0	0	0	1	1
A0A5S8K742	GLRA4	Glycine receptor alpha 4 (pseudogene)	1	0.2	0	0	0	0	0	0	0	0	0	0	1	0.4	0	0	0	0	2	2
Q49A26	GLYR1	Putative oxidoreductase GLYR1	0	0	0	0	0	0	1	0.2	0	0	0	0	0	0	0	0	0	0	1	1
Q96IK5	GMCL1	Germ cell-less protein-like 1	0	0	0	0	0	0	0	0	0	0	1	0.2	0	0	0	0	0	0	1	1
P04899	GNAI2	Guanine nucleotide-binding protein G(i) subunit alpha-2	4	2.4	4	2.8	5	2.4	2	0.8	1	0.4	3	1.6	1	0.4	3	1.6	5	3.2	28	9
P19086	GNAZ	Guanine nucleotide-binding protein G(z) subunit alpha	0	0	0	0	1	0.2	0	0	0	0	0	0	0	0	0	0	0	0	1	1
P62873	GNB1	Guanine nucleotide-binding protein G(I)/G(S)/G(T) subunit beta-1	4	2	3	1.6	4	1.6	1	0.4	3	1.6	3	2	2	0.8	4	1.6	1	0.4	25	9
P62879	GNB2	Guanine nucleotide-binding protein G(I)/G(S)/G(T) subunit beta-2	4	2.2	3	1.6	4	1.6	1	0.4	4	1.8	3	2.2	2	0.8	4	1.6	1	0.4	26	9
Q9UBI6	GNG12	Guanine nucleotide-binding protein G(I)/G(S)/G(O) subunit gamma-12	4	0.8	0	0	0	0	2	0.4	2	0.4	1	0.4	1	0.2	1	0.2	0	0	11	6
Q08378	GOLGA3	Golgin subfamily A member 3	1	0.2	1	0.2	1	0.2	0	0	0	0	0	0	1	0.2	0	0	0	0	4	4
Q9H4A6	GOLPH3	Golgi phosphoprotein 3	0	0	0	0	1	0.2	0	0	0	0	0	0	0	0	0	0	0	0	1	1
Q9BXV9	GON7	EKC/KEOPS complex subunit GON7	0	0	0	0	0	0	0	0	0	0	1	0.2	0	0	0	0	0	0	1	1
Q5T7V8	GORAB	RAB6-interacting golgin	0	0	0	0	1	0.2	0	0	0	0	0	0	0	0	0	0	0	0	1	1
P00505	GOT2	Aspartate aminotransferase, mitochondrial	0	0	0	0	0	0	0	0	0	0	0	0	0	0	0	0	1	0.4	1	1
Q99795	GPA33	Cell surface A33 antigen	0	0	0	0	0	0	0	0	0	0	0	0	0	0	1	0.2	0	0	1	1
Q9UKJ3	GPATCH8	G patch domain-containing protein 8	0	0	0	0	0	0	0	0	1	0.2	0	0	0	0	0	0	0	0	1	1
A0A087WVN0	GPER1	G-protein-coupled estrogen receptor 1	0	0	1	0.2	0	0	0	0	0	0	0	0	0	0	0	0	0	0	1	1
Q96T91	GPHA2	Glycoprotein hormone alpha-2	0	0	1	0.2	0	0	0	0	0	0	0	0	0	0	0	0	0	0	1	1
A0A2U3TZU2	GPI	Glucose-6-phosphate isomerase	3	1.6	3	1.2	4	2.4	4	1.6	4	1.4	5	4.2	3	1.6	3	1.2	4	3.8	33	9
P51674	GPM6A	Neuronal membrane glycoprotein M6-a	1	0.2	1	0.4	0	0	0	0	1	0.4	1	0.2	0	0	0	0	0	0	4	4
Q8TDV0	GPR151	G-protein coupled receptor 151	0	0	0	0	0	0	1	0.2	0	0	0	0	0	0	0	0	0	0	1	1
A0A1W2PQ30	GRAMD1B	Protein Aster-B	0	0	0	0	0	0	0	0	0	0	1	0.2	0	0	0	0	0	0	1	1
U3KQ56	GRHPR	Glyoxylate reductase/hydroxypyruvate reductase	0	0	0	0	1	0.2	0	0	0	0	0	0	0	0	0	0	0	0	1	1
O43424	GRID2	Glutamate receptor ionotropic, delta-2	0	0	0	0	1	0.2	0	0	0	0	0	0	0	0	0	0	0	0	1	1
Q8TCU5	GRIN3A	Glutamate receptor ionotropic, NMDA 3A	0	0	0	0	0	0	0	0	0	0	0	0	0	0	0	0	1	0.4	1	1
Q9C0E4	GRIP2	Glutamate receptor-interacting protein 2	0	0	0	0	0	0	0	0	1	0.2	0	0	0	0	0	0	0	0	1	1
Q14833	GRM4	Metabotropic glutamate receptor 4	0	0	0	0	0	0	1	0.2	0	0	0	0	0	0	0	0	0	0	1	1
O00222	GRM8	Metabotropic glutamate receptor 8	0	0	0	0	0	0	0	0	0	0	0	0	0	0	0	0	1	0.2	1	1
Q5TC63	GRTP1	Growth hormone-regulated TBC protein 1	0	0	0	0	0	0	1	0.2	0	0	0	0	0	0	0	0	0	0	1	1
M0QX71	GRWD1	Glutamate-rich WD repeat-containing protein 1 (Fragment)	0	0	0	0	1	0.2	0	0	0	0	0	0	0	0	0	0	0	0	1	1
P00390	GSR	Glutathione reductase, mitochondrial	0	0	0	0	0	0	0	0	0	0	0	0	0	0	0	0	1	0.2	1	1
Q7RTV2	GSTA5	Glutathione S-transferase A5	0	0	0	0	0	0	0	0	0	0	0	0	0	0	0	0	1	0.2	1	1
Q8NEC7	GSTCD	Glutathione S-transferase C-terminal domain-containing protein	0	0	0	0	0	0	0	0	0	0	0	0	0	0	0	0	1	0.2	1	1
P46439	GSTM5	Glutathione S-transferase Mu 5	0	0	0	0	1	0.2	0	0	1	0.2	0	0	0	0	0	0	0	0	2	2
P09211	GSTP1	Glutathione S-transferase P	5	4	5	1.8	5	5.8	5	3.8	5	4.4	5	5.2	5	5	5	4.8	5	6.4	45	9
A0A1W2PQM5	GSTT4	Glutathione S-transferase theta-4	1	0.2	0	0	1	0.2	0	0	0	0	0	0	1	0.2	0	0	0	0	3	3
E9PFE2	GTF2IRD1	General transcription factor II-I repeat domain-containing protein 1	0	0	0	0	0	0	0	0	0	0	0	0	0	0	0	0	1	0.2	1	1
O00178	GTPBP1	GTP-binding protein 1	0	0	0	0	1	0.2	0	0	0	0	1	0.2	1	0.2	0	0	0	0	3	3
Q9BZE4	GTPBP4	Nucleolar GTP-binding protein 1	0	0	0	0	0	0	1	0.2	0	0	0	0	0	0	0	0	0	0	1	1
Q02846	GUCY2D	Retinal guanylyl cyclase 1	0	0	0	0	1	0.2	0	0	0	0	0	0	0	0	0	0	0	0	1	1
Q7Z2Y8	GVINP1	Interferon-induced very large GTPase 1	0	0	1	0.2	0	0	0	0	0	0	0	0	0	0	1	0.2	0	0	2	2
Q8N7I0	GVQW1	Protein GVQW1	1	0.2	0	0	0	0	0	0	0	0	0	0	0	0	0	0	0	0	1	1
Q92522	H1-10	Histone H1.10	0	0	4	0.8	1	0.2	1	0.2	3	0.6	1	0.2	1	0.2	0	0	2	0.4	13	7
P16402	H1-3	Histone H1.3	4	3.8	5	2.8	5	5	4	2.4	5	3.2	4	5.8	5	3.2	5	4.2	5	5.2	42	9
P16401	H1-5	Histone H1.5	5	5.6	5	5.2	5	6	5	7.2	5	6.4	5	5.6	5	5.6	5	4.4	5	5.2	45	9
Q6FI13	H2AC18	Histone H2A type 2-A	5	8.8	5	13.4	5	10.6	5	9.8	5	14.2	5	12	5	10	5	10.8	5	11	45	9
Q8IUE6	H2AC21	Histone H2A type 2-B	2	1	2	1	2	0.6	2	0.6	2	1.2	0	0	2	2	4	2.8	1	0.2	17	8
P0C0S5	H2AZ1	Histone H2A.Z	1	0.4	2	0.8	1	0.8	1	0.2	1	0.4	0	0	1	0.4	0	0	0	0	7	6
U3KQK0	H2BC15	Histone H2B	2	0.6	1	0.2	2	0.6	1	0.2	1	0.2	2	1.2	3	0.8	2	0.6	1	0.2	15	9
P84243	H3-3A	Histone H3.3	0	0	3	1.8	2	0.8	2	0.4	2	1.4	2	0.6	1	0.2	4	2.4	4	1.6	20	8
P68431	H3C1	Histone H3.1	1	0.4	4	1.6	3	2.6	3	1.2	2	0.6	5	2	2	0.6	5	3.4	4	1.8	29	9
Q71DI3	H3C15	Histone H3.2	0	0	0	0	0	0	0	0	2	0.4	1	0.2	0	0	1	0.2	0	0	4	3
P62805	H4C1	Histone H4	5	7	5	7.4	5	7.4	5	6.6	5	6.8	5	7	5	5.2	5	7.8	5	6.6	45	9
Q14520	HABP2	Hyaluronan-binding protein 2	0	0	0	0	0	0	0	0	1	0.2	0	0	0	0	0	0	0	0	1	1
Q9P035	HACD3	Very-long-chain (3R)-3-hydroxyacyl-CoA dehydratase 3	3	0.6	1	0.2	1	0.2	0	0	1	0.4	1	0.2	1	0.2	0	0	0	0	8	6
Q9UJ83	HACL1	2-hydroxyacyl-CoA lyase 1	0	0	0	0	0	0	0	0	0	0	0	0	0	0	0	0	1	0.2	1	1
E9PF18	HADH	Hydroxyacyl-coenzyme A dehydrogenase, mitochondrial	0	0	0	0	0	0	0	0	0	0	1	0.4	0	0	0	0	0	0	1	1
H0YFD6	HADHA	Trifunctional enzyme subunit alpha, mitochondrial	2	1.4	5	2	4	2.6	2	1.4	4	1.6	4	3	4	2.4	4	1.8	4	2.4	33	9
A0A087WT54	HDGFL2	Hepatoma-derived growth factor-related protein 2 (Fragment)	0	0	0	0	0	0	0	0	1	0.2	0	0	0	0	0	0	0	0	1	1
Q9Y3E1	HDGFL3	Hepatoma-derived growth factor-related protein 3	1	0.2	0	0	0	0	0	0	1	0.4	0	0	0	0	1	0.4	0	0	3	3
A0A024R4E5	HDLBP	High density lipoprotein binding protein (Vigilin), isoform CRA_a	3	1.2	3	0.8	2	0.6	5	1.4	2	0.6	1	0.2	5	2.6	4	1.2	2	0.8	27	9
Q9P2D3	HEATR5B	HEAT repeat-containing protein 5B	0	0	0	0	0	0	0	0	0	0	0	0	1	0.2	0	0	0	0	1	1
Q5T447	HECTD3	E3 ubiquitin-protein ligase HECTD3	0	0	0	0	1	0.2	0	0	0	0	0	0	0	0	0	0	0	0	1	1
Q9Y4D8	HECTD4	Probable E3 ubiquitin-protein ligase HECTD4	0	0	0	0	0	0	0	0	0	0	0	0	0	0	1	0.2	1	0.2	2	2
Q9BVR0	HERC2P3	Putative HERC2-like protein 3	0	0	0	0	0	0	0	0	0	0	1	0.2	0	0	0	0	0	0	1	1
Q9UII4	HERC5	E3 ISG15--protein ligase HERC5	0	0	0	0	0	0	0	0	0	0	0	0	2	0.4	0	0	0	0	2	1
Q902F9	HERVK_113	Endogenous retrovirus group K member 113 Env polyprotein	1	0.2	0	0	0	0	0	0	0	0	0	0	0	0	0	0	0	0	1	1
Q96JK4	HHIPL1	HHIP-like protein 1	0	0	0	0	0	0	0	0	0	0	1	0.2	0	0	0	0	0	0	1	1
Q6NVY1	HIBCH	3-hydroxyisobutyryl-CoA hydrolase, mitochondrial	0	0	0	0	0	0	1	0.2	0	0	0	0	0	0	0	0	0	0	1	1
Q9BQA5	HINFP	Histone H4 transcription factor	0	0	0	0	0	0	0	0	0	0	0	0	0	0	1	0.2	0	0	1	1
P49773	HINT1	Histidine triad nucleotide-binding protein 1	0	0	0	0	1	0.2	0	0	0	0	0	0	0	0	0	0	0	0	1	1
P31629	HIVEP2	Transcription factor HIVEP2	2	0.6	2	0.6	0	0	0	0	0	0	0	0	1	0.2	1	0.4	0	0	6	4
P19367	HK1	Hexokinase-1	0	0	1	0.2	1	0.2	0	0	0	0	0	0	0	0	0	0	0	0	2	2
P52790	HK3	Hexokinase-3	1	0.2	0	0	0	0	0	0	0	0	0	0	1	0.2	0	0	0	0	2	2
A0A0G2JPD3	HLA-A	HLA class I histocompatibility antigen, A alpha chain	0	0	2	0.4	3	1	0	0	1	0.2	1	0.2	0	0	2	0.4	5	1.4	14	6
D9J307	HLA-B	HLA class I antigen	0	0	0	0	1	0.2	0	0	0	0	0	0	0	0	0	0	1	0.2	2	2
A0A140T9B3	HLA-C	HLA class I histocompatibility antigen, C alpha chain	4	1	5	1.8	5	2.6	5	2	5	2	5	3.2	4	1.4	5	2.2	5	3.2	43	9
A0A0U5Q247	HLA-DQB1	HLA class II histocompatibility antigen, DQ beta 1 chain	0	0	0	0	1	0.2	0	0	0	0	0	0	0	0	0	0	0	0	1	1
Q8NDA2	HMCN2	Hemicentin-2	0	0	1	0.2	0	0	0	0	0	0	0	0	0	0	0	0	0	0	1	1
P09429	HMGB1	High mobility group protein B1	3	2	4	2	3	1.2	5	4	3	1.6	4	2	3	2	5	3.2	3	1.6	33	9
P35914	HMGCL	Hydroxymethylglutaryl-CoA lyase, mitochondrial	0	0	0	0	0	0	0	0	0	0	0	0	0	0	0	0	1	0.2	1	1
P09651	HNRNPA1	Heterogeneous nuclear ribonucleoprotein A1	5	8.6	5	7.8	5	8	5	6.8	5	10.4	5	9.2	5	6.6	5	10.8	5	10.4	45	9
A0A2R8Y4L2	HNRNPA1P48	Heterogeneous nuclear ribonucleoprotein A1 pseudogene 48	2	2.2	3	3.6	2	3.4	3	3.8	2	3	3	3.8	3	2.2	2	3.2	2	3.8	22	9
P22626	HNRNPA2B1	Heterogeneous nuclear ribonucleoproteins A2/B1	5	6.2	5	7.4	5	6.8	5	7.4	5	9.8	5	8.2	5	6.4	5	9.6	5	5.8	45	9
P51991	HNRNPA3	Heterogeneous nuclear ribonucleoprotein A3	2	0.6	3	1.8	2	0.8	5	4.4	3	2.4	2	0.8	3	1.2	5	3.2	4	4.2	29	9
D6RBZ0	HNRNPAB	Heterogeneous nuclear ribonucleoprotein A/B	5	4	5	2.2	3	1.2	4	2.4	5	1.6	3	1.2	4	1.8	5	1.2	4	1.6	38	9
P07910	HNRNPC	Heterogeneous nuclear ribonucleoproteins C1/C2	3	1.2	4	3.4	3	1	4	2.4	3	1	3	1.4	3	1.6	3	1.2	3	0.6	29	9
Q14103	HNRNPD	Heterogeneous nuclear ribonucleoprotein D0	5	4	5	7.4	5	5.2	5	7	5	6	5	4.4	5	6	5	6.4	5	5.2	45	9
O14979	HNRNPDL	Heterogeneous nuclear ribonucleoprotein D-like	5	4.6	3	1.2	2	0.8	4	1.4	4	1.6	4	1.2	3	1.4	3	1	4	1.6	32	9
P52597	HNRNPF	Heterogeneous nuclear ribonucleoprotein F	2	0.4	1	0.2	2	1.6	1	0.2	2	0.6	1	0.2	0	0	2	1	2	0.8	13	8
G8JLB6	HNRNPH1	Heterogeneous nuclear ribonucleoprotein H	5	3.8	5	3.6	4	2.6	4	3.2	3	2	3	1.6	5	3.2	4	2.2	5	2.6	38	9
P61978	HNRNPK	Heterogeneous nuclear ribonucleoprotein K	5	3.4	4	2.2	5	4.2	5	3	5	2	5	4.2	4	2.8	5	1.8	5	4.4	43	9
P14866	HNRNPL	Heterogeneous nuclear ribonucleoprotein L	5	5.4	5	5.8	5	7.2	4	5	5	8.6	5	6.4	5	5.2	5	5.2	5	4.6	44	9
A0A087X0X3	HNRNPM	Heterogeneous nuclear ribonucleoprotein M	4	1.6	2	1	0	0	1	0.6	3	0.8	3	1.4	1	0.2	0	0	3	1	17	7
O43390	HNRNPR	Heterogeneous nuclear ribonucleoprotein R	0	0	0	0	1	0.2	0	0	0	0	0	0	2	0.4	1	0.2	3	0.6	7	4
Q00839	HNRNPU	Heterogeneous nuclear ribonucleoprotein U	5	7	5	8.6	5	10	5	7.6	5	6.8	5	7.6	5	7	5	8.2	5	9	45	9
Q9NSC5	HOMER3	Homer protein homolog 3	0	0	0	0	1	0.2	0	0	0	0	0	0	0	0	0	0	0	0	1	1
Q9UJC3	HOOK1	Protein Hook homolog 1	0	0	1	0.2	0	0	0	0	0	0	0	0	0	0	0	0	0	0	1	1
P14651	HOXB3	Homeobox protein Hox-B3	0	0	1	0.2	0	0	0	0	0	0	0	0	0	0	0	0	0	0	1	1
H0Y300	HP	Haptoglobin	0	0	0	0	2	0.6	0	0	0	0	0	0	0	0	0	0	0	0	2	1
P51659	HSD17B4	Peroxisomal multifunctional enzyme type 2	1	0.2	0	0	2	0.4	2	0.6	2	0.4	1	0.2	2	0.4	2	0.4	0	0	12	7
Q6YN16	HSDL2	Hydroxysteroid dehydrogenase-like protein 2	0	0	0	0	0	0	1	0.2	0	0	0	0	0	0	0	0	0	0	1	1
H0YBS6	HSF4	Heat shock factor protein 4 (Fragment)	0	0	0	0	0	0	0	0	0	0	0	0	0	0	1	0.2	0	0	1	1
P07900	HSP90AA1	Heat shock protein HSP 90-alpha	5	15	5	15.6	5	14	5	20.4	5	15.6	5	12.8	5	17.2	5	15	5	14.6	45	9
P08238	HSP90AB1	Heat shock protein HSP 90-beta	5	19	5	16.4	5	19	5	26.4	5	20.6	5	16.8	5	21.2	5	21.2	5	18	45	9
Q58FF6	HSP90AB4P	Putative heat shock protein HSP 90-beta 4	1	0.2	2	1.2	1	0.8	2	2	1	0.8	2	0.8	3	1.2	2	1.6	1	0.8	15	9
P14625	HSP90B1	Endoplasmin	5	9.2	5	9.8	5	10.8	5	11.6	5	11.4	5	14.6	5	9.8	5	10.6	5	10.4	45	9
A0A0G2JIW1	HSPA1B	Heat shock 70 kDa protein 1B	3	1.2	4	1.4	5	1.8	5	1.8	4	1	4	1.4	5	1.6	5	2	4	1.2	39	9
P11021	HSPA5	Endoplasmic reticulum chaperone BiP	5	22	5	20.6	5	20.2	5	22.6	5	17.8	5	17.6	5	21	5	18.2	5	18.6	45	9
P11142	HSPA8	Heat shock cognate 71 kDa protein	5	26	5	24	5	27.2	5	26	5	26.4	5	25	5	27.6	5	23.2	5	26.8	45	9
P38646	HSPA9	Stress-70 protein, mitochondrial	4	2.4	5	3.6	1	0.6	3	2.6	4	2.8	3	1.4	2	1.6	5	2.4	4	1.6	31	9
P04792	HSPB1	Heat shock protein beta-1	5	7.2	5	7.6	5	7.2	5	5.4	5	6.6	5	5.6	5	5.8	5	9.4	5	8.4	45	9
P10809	HSPD1	60 kDa heat shock protein, mitochondrial	5	18.8	5	19.6	5	21.4	5	18	5	16.6	5	19	5	18.4	5	22	5	19.2	45	9
P61604	HSPE1	10 kDa heat shock protein, mitochondrial	5	7.6	5	7.6	5	7.6	5	8.4	5	8	5	7.2	5	8.4	5	8	5	7.6	45	9
P98160	HSPG2	Basement membrane-specific heparan sulfate proteoglycan core protein	1	0.2	2	0.4	3	0.8	1	0.2	1	0.2	1	0.4	0	0	0	0	4	1	13	7
P28223	HTR2A	5-hydroxytryptamine receptor 2A	0	0	0	0	0	0	0	0	0	0	0	0	1	0.2	0	0	0	0	1	1
P42858	HTT	Huntingtin	0	0	0	0	0	0	1	0.4	0	0	0	0	0	0	0	0	0	0	1	1
Q4G0P3	HYDIN	Hydrocephalus-inducing protein homolog	0	0	1	0.2	0	0	0	0	0	0	0	0	0	0	0	0	0	0	1	1
A0A494C039	HYOU1	Hypoxia up-regulated protein 1	5	2.8	2	0.8	3	1	3	1.4	3	2.6	2	0.8	4	1.6	4	2	5	2.8	31	9
P41252	IARS1	Isoleucine--tRNA ligase, cytoplasmic	0	0	0	0	0	0	1	0.2	0	0	1	0.2	0	0	0	0	0	0	2	2
P05362	ICAM1	Intercellular adhesion molecule 1	0	0	0	0	0	0	0	0	0	0	2	0.6	0	0	0	0	0	0	2	1
P13598	ICAM2	Intercellular adhesion molecule 2	0	0	0	0	0	0	0	0	0	0	0	0	0	0	0	0	1	0.2	1	1
Q9Y2F5	ICE1	Little elongation complex subunit 1	0	0	1	0.2	2	0.4	0	0	1	0.2	0	0	0	0	0	0	0	0	4	3
O75874	IDH1	Isocitrate dehydrogenase [NADP] cytoplasmic	0	0	0	0	0	0	0	0	0	0	0	0	0	0	1	0.2	1	0.2	2	2
Q16666	IFI16	Gamma-interferon-inducible protein 16	2	0.8	0	0	3	1.2	3	1.2	0	0	3	1.2	0	0	1	0.4	0	0	12	5
Q01628	IFITM3	Interferon-induced transmembrane protein 3	0	0	0	0	0	0	0	0	1	0.4	0	0	0	0	0	0	0	0	1	1
Q86WN2	IFNE	Interferon epsilon	0	0	0	0	0	0	0	0	0	0	0	0	0	0	0	0	1	0.2	1	1
P15260	IFNGR1	Interferon gamma receptor 1	0	0	0	0	0	0	0	0	0	0	0	0	0	0	0	0	1	0.2	1	1
Q9P0W0	IFNK	Interferon kappa	0	0	1	0.2	0	0	0	0	0	0	0	0	0	0	0	0	0	0	1	1
Q96RY7	IFT140	Intraflagellar transport protein 140 homolog	0	0	0	0	0	0	0	0	0	0	0	0	1	0.2	0	0	0	0	1	1
H3BRJ5	IFT80	Uncharacterized protein	0	0	0	0	0	0	1	0.2	0	0	0	0	0	0	0	0	0	0	1	1
P11717	IGF2R	Cation-independent mannose-6-phosphate receptor	0	0	1	0.2	0	0	0	0	0	0	0	0	0	0	0	0	0	0	1	1
Q6B9Z1	IGFL4	Insulin growth factor-like family member 4	0	0	0	0	0	0	1	0.2	0	0	0	0	0	0	0	0	0	0	1	1
P01814	IGHV2-70	Immunoglobulin heavy variable 2-70	1	0.2	0	0	0	0	0	0	0	0	0	0	0	0	0	0	0	0	1	1
Q8N6C5	IGSF1	Immunoglobulin superfamily member 1	0	0	0	0	0	0	1	0.2	1	0.2	0	0	0	0	0	0	0	0	2	2
Q8N9C0	IGSF22	Immunoglobulin superfamily member 22	0	0	0	0	0	0	0	0	0	0	0	0	1	0.2	0	0	0	0	1	1
Q9NSI5	IGSF5	Immunoglobulin superfamily member 5	0	0	0	0	0	0	1	0.2	0	0	0	0	0	0	0	0	0	0	1	1
P78552	IL13RA1	Interleukin-13 receptor subunit alpha-1	0	0	0	0	1	0.2	0	0	0	0	0	0	0	0	0	0	1	0.2	2	2
P14778	IL1R1	Interleukin-1 receptor type 1	0	0	0	0	1	0.2	1	0.2	0	0	0	0	0	0	0	0	0	0	2	2
Q8N6P7	IL22RA1	Interleukin-22 receptor subunit alpha-1	0	0	0	0	0	0	0	0	0	0	1	0.2	0	0	0	0	0	0	1	1
Q96RQ9	IL4I1	L-amino-acid oxidase	0	0	0	0	1	0.2	0	0	0	0	1	0.2	0	0	0	0	0	0	2	2
Q12905	ILF2	Interleukin enhancer-binding factor 2	0	0	0	0	1	0.8	2	1.2	0	0	0	0	3	1.2	1	0.4	1	0.8	8	5
Q12906	ILF3	Interleukin enhancer-binding factor 3	0	0	1	0.2	0	0	0	0	0	0	0	0	1	0.4	0	0	0	0	2	2
E5RIP7	IMPA1	Inositol-1-monophosphatase (Fragment)	0	0	0	0	0	0	1	0.2	0	0	0	0	0	0	0	0	0	0	1	1
P12268	IMPDH2	Inosine-5'-monophosphate dehydrogenase 2	1	0.4	1	0.4	0	0	0	0	0	0	0	0	0	0	0	0	0	0	2	2
Q9ULG1	INO80	Chromatin-remodeling ATPase INO80	1	0.2	0	0	0	0	0	0	0	0	0	0	0	0	0	0	0	0	1	1
B8ZZB2	INPP4A	Inositol polyphosphate-4-phosphatase type I A	0	0	0	0	0	0	0	0	0	0	0	0	1	0.2	0	0	0	0	1	1
Q8N201	INTS1	Integrator complex subunit 1	0	0	0	0	0	0	0	0	0	0	0	0	1	0.2	0	0	0	0	1	1
J3KMZ7	INTS2	Integrator complex subunit 2	0	0	0	0	0	0	0	0	0	0	0	0	0	0	0	0	1	0.2	1	1
A0A1W2PPI5	INTS6L	DEAD/H (Asp-Glu-Ala-Asp/His) box polypeptide 26B, isoform CRA_b	0	0	1	0.2	0	0	0	0	0	0	0	0	1	0.2	0	0	0	0	2	2
Q8TEX9	IPO4	Importin-4	1	0.2	0	0	0	0	0	0	0	0	0	0	0	0	0	0	0	0	1	1
Q96P70	IPO9	Importin-9	0	0	0	0	2	0.4	2	0.4	4	0.8	1	0.2	2	0.4	3	0.6	0	0	14	6
A6NCM1	IQCA1L	IQ and AAA domain-containing protein 1-like	0	0	0	0	1	0.2	0	0	0	0	0	0	0	0	0	0	0	0	1	1
Q9H095	IQCG	Dynein regulatory complex protein 9	0	0	0	0	0	0	1	0.2	1	0.2	0	0	0	0	0	0	0	0	2	2
P46940	IQGAP1	Ras GTPase-activating-like protein IQGAP1	5	5	5	3.4	5	7.8	5	5.8	5	6.2	5	4.8	5	6.8	5	6	5	7.2	45	9
Q9Y6F6	IRAG1	Protein MRVI1	0	0	1	0.4	0	0	0	0	0	0	0	0	0	0	0	0	0	0	1	1
Q9Y616	IRAK3	Interleukin-1 receptor-associated kinase 3	0	0	0	0	0	0	0	0	0	0	0	0	0	0	1	0.2	0	0	1	1
Q9BZI1	IRX2	Iroquois-class homeodomain protein IRX-2	0	0	1	0.2	0	0	0	0	0	0	0	0	0	0	0	0	0	0	1	1
Q96J02	ITCH	E3 ubiquitin-protein ligase Itchy homolog	0	0	1	0.2	0	0	0	0	0	0	0	0	0	0	0	0	0	0	1	1
P08514	ITGA2B	Integrin alpha-IIb	0	0	0	0	0	0	0	0	0	0	0	0	0	0	0	0	1	0.2	1	1
P08648	ITGA5	Integrin alpha-5	0	0	0	0	0	0	1	0.2	0	0	1	0.2	3	0.8	1	0.2	0	0	6	4
P05556	ITGB1	Integrin beta-1	2	0.8	0	0	2	0.4	0	0	0	0	1	0.6	0	0	1	0.2	2	1	8	5
P16144	ITGB4	Integrin beta-4	0	0	0	0	0	0	1	0.2	0	0	0	0	0	0	0	0	0	0	1	1
Q5T985	ITIH2	Inter-alpha-trypsin inhibitor heavy chain H2	0	0	0	0	0	0	0	0	0	0	0	0	0	0	0	0	1	0.2	1	1
Q14643	ITPR1	Inositol 1,4,5-trisphosphate receptor type 1	0	0	0	0	0	0	1	0.2	0	0	0	0	0	0	0	0	0	0	1	1
Q14571	ITPR2	Inositol 1,4,5-trisphosphate receptor type 2	0	0	0	0	0	0	0	0	0	0	0	0	0	0	1	0.2	0	0	1	1
A0A087WUB1	ITPRID1	Protein ITPRID1	0	0	0	0	0	0	1	0.2	0	0	0	0	0	0	0	0	0	0	1	1
P28290	ITPRID2	Protein ITPRID2	0	0	0	0	0	0	0	0	0	0	1	0.2	0	0	0	0	0	0	1	1
Q9NZM3	ITSN2	Intersectin-2	0	0	1	0.2	2	0.8	1	0.2	1	0.4	1	0.2	3	0.8	3	0.6	3	0.6	15	8
F6VN83	IYD	Iodotyrosine deiodinase 1	0	0	0	0	0	0	0	0	0	0	1	0.2	0	0	0	0	0	0	1	1
Q9UK76	JPT1	Jupiter microtubule associated homolog 1	0	0	0	0	0	0	1	0.2	0	0	0	0	0	0	0	0	0	0	1	1
H3BQK5	KARS1	Lysine--tRNA ligase	1	0.2	0	0	0	0	0	0	0	0	0	0	0	0	0	0	0	0	1	1
K7EMW1	KATNAL2	Katanin p60 ATPase-containing subunit A-like 2 (Fragment)	0	0	0	0	0	0	0	0	0	0	0	0	0	0	0	0	1	0.2	1	1
H0YMR8	KATNBL1	KATNB1-like protein 1 (Fragment)	0	0	0	0	0	0	0	0	0	0	0	0	1	0.2	0	0	0	0	1	1
A0A075B6T4	KBTBD4	Kelch repeat and BTB domain-containing protein 4	0	0	1	0.2	0	0	0	0	0	0	0	0	0	0	0	0	0	0	1	1
Q96PR1	KCNC2	Potassium voltage-gated channel subfamily C member 2	0	0	1	0.2	0	0	0	0	0	0	0	0	0	0	0	0	0	0	1	1
Q9ULD8	KCNH3	Potassium voltage-gated channel subfamily H member 3	0	0	0	0	0	0	0	0	0	0	0	0	1	0.2	0	0	0	0	1	1
Q9NS40	KCNH7	Potassium voltage-gated channel subfamily H member 7	0	0	0	0	0	0	0	0	0	0	1	0.2	0	0	0	0	0	0	1	1
Q9NZI2	KCNIP1	Kv channel-interacting protein 1	2	0.4	1	0.2	2	0.6	2	0.4	1	0.2	2	0.8	3	0.8	1	0.4	2	0.6	16	9
Q3YAB7	KCNIP4	Kv channel-interacting protein 4	0	0	1	0.2	0	0	0	0	0	0	0	0	0	0	0	0	0	0	1	1
Q99712	KCNJ15	ATP-sensitive inward rectifier potassium channel 15	0	0	0	0	0	0	0	0	0	0	0	0	0	0	0	0	1	0.2	1	1
V9GYV2	KCNN1	Small conductance calcium-activated potassium channel protein 1 (Fragment)	1	0.2	0	0	0	0	0	0	0	0	0	0	0	0	0	0	0	0	1	1
Q6UVM3	KCNT2	Potassium channel subfamily T member 2	0	0	0	0	0	0	0	0	0	0	0	0	0	0	0	0	1	0.2	1	1
Q9H3F6	KCTD10	BTB/POZ domain-containing adapter for CUL3-mediated RhoA degradation protein 3	0	0	0	0	0	0	0	0	0	0	0	0	0	0	1	0.2	0	0	1	1
Q8WZ19	KCTD13	BTB/POZ domain-containing adapter for CUL3-mediated RhoA degradation protein 1	0	0	0	0	0	0	0	0	0	0	0	0	0	0	1	0.2	0	0	1	1
Q14681	KCTD2	BTB/POZ domain-containing protein KCTD2	0	0	0	0	0	0	0	0	0	0	0	0	1	0.2	0	0	0	0	1	1
A0A0C4DGG3	KDM2B	Lysine-specific demethylase 2B	1	0.2	0	0	0	0	0	0	0	0	0	0	0	0	0	0	0	0	1	1
Q7LBC6	KDM3B	Lysine-specific demethylase 3B	1	0.2	0	0	0	0	0	0	0	0	0	0	0	0	0	0	0	0	1	1
R4GN45	KDM5B	Lysine-specific demethylase 5B (Fragment)	0	0	0	0	0	0	0	0	0	0	0	0	0	0	0	0	1	0.2	1	1
P35968	KDR	Vascular endothelial growth factor receptor 2	0	0	0	0	0	0	1	0.2	0	0	0	0	0	0	0	0	0	0	1	1
K7EQS7	KDSR	3-ketodihydrosphingosine reductase (Fragment)	0	0	0	0	0	0	0	0	0	0	1	0.2	0	0	0	0	0	0	1	1
P23276	KEL	Kell blood group glycoprotein	0	0	1	0.2	0	0	0	0	0	0	0	0	0	0	1	0.2	0	0	2	2
Q07666	KHDRBS1	KH domain-containing, RNA-binding, signal transduction-associated protein 1	4	3.4	4	1.6	3	1.8	5	2.6	3	1.2	5	3	3	2.4	1	0.8	3	1.8	31	9
Q8IV33	KIAA0825	Uncharacterized protein KIAA0825	0	0	1	0.2	0	0	0	0	0	0	0	0	0	0	0	0	0	0	1	1
Q9HCI6	KIAA1586	E3 SUMO-protein ligase KIAA1586	0	0	0	0	0	0	0	0	0	0	0	0	0	0	1	0.2	0	0	1	1
Q6NSI8	KIAA1841	Uncharacterized protein KIAA1841	0	0	0	0	0	0	0	0	0	0	0	0	0	0	0	0	1	0.2	1	1
P52732	KIF11	Kinesin-like protein KIF11	0	0	1	0.2	0	0	0	0	0	0	0	0	1	0.2	0	0	0	0	2	2
A0A1W2PPS5	KIF12	Kinesin-like protein	0	0	1	0.2	0	0	0	0	0	0	0	0	0	0	0	0	0	0	1	1
A0A1B0GUA8	KIF13A	Kinesin-like protein KIF13A	0	0	0	0	0	0	0	0	1	0.2	0	0	0	0	0	0	0	0	1	1
Q9NQT8	KIF13B	Kinesin-like protein KIF13B	0	0	0	0	0	0	1	0.2	0	0	0	0	0	0	0	0	0	0	1	1
Q7Z4S6	KIF21A	Kinesin-like protein KIF21A	0	0	0	0	0	0	0	0	0	0	0	0	1	0.2	0	0	0	0	1	1
Q9ULI4	KIF26A	Kinesin-like protein KIF26A	0	0	0	0	0	0	1	0.2	0	0	0	0	0	0	0	0	0	0	1	1
Q2KJY2	KIF26B	Kinesin-like protein KIF26B	0	0	0	0	1	0.2	0	0	0	0	0	0	0	0	0	0	0	0	1	1
Q12840	KIF5A	Kinesin heavy chain isoform 5A	0	0	0	0	1	0.2	0	0	0	0	0	0	0	0	0	0	0	0	1	1
P33176	KIF5B	Kinesin-1 heavy chain	1	0.2	4	1.6	0	0	4	2.2	1	0.4	2	0.8	2	0.8	1	0.4	1	0.8	16	8
Q9BVG8	KIFC3	Kinesin-like protein KIFC3	0	0	0	0	0	0	0	0	0	0	0	0	0	0	1	0.2	0	0	1	1
A0A0G2JN68	KIR2DL5B	Uncharacterized protein	0	0	0	0	0	0	0	0	0	0	0	0	0	0	0	0	1	0.2	1	1
A0A0G2JLM5	KIR2DS4	Uncharacterized protein	0	0	0	0	0	0	0	0	1	0.2	0	0	0	0	0	0	0	0	1	1
E9PRX9	KIRREL3	Kin of IRRE-like protein 3	0	0	0	0	0	0	0	0	1	0.2	0	0	0	0	0	0	0	0	1	1
Q13118	KLF10	Krueppel-like factor 10	1	0.2	0	0	0	0	0	0	0	0	0	0	0	0	0	0	0	0	1	1
H0YK05	KLF13	Krueppel-like factor 13	0	0	0	0	0	0	0	0	0	0	0	0	0	0	1	0.2	0	0	1	1
Q9UJP4	KLHL21	Kelch-like protein 21	0	0	0	0	0	0	0	0	0	0	0	0	0	0	0	0	1	0.2	1	1
P06870	KLK1	Kallikrein-1	0	0	0	0	1	0.2	0	0	0	0	0	0	0	0	0	0	0	0	1	1
F5H6K3	KLRC3	C-type lectin domain-containing protein	1	0.2	0	0	0	0	0	0	0	0	0	0	0	0	0	0	0	0	1	1
P50748	KNTC1	Kinetochore-associated protein 1	0	0	1	0.2	0	0	0	0	0	0	0	0	0	0	0	0	0	0	1	1
O00505	KPNA3	Importin subunit alpha-4	0	0	0	0	2	0.8	0	0	0	0	2	1	0	0	4	1.6	1	0.4	9	4
O00629	KPNA4	Importin subunit alpha-3	2	1.2	3	2	2	1.2	3	1.6	4	2.8	2	1.2	4	2	4	2.8	3	2	27	9
Q14974	KPNB1	Importin subunit beta-1	3	1.2	4	0.8	4	1.8	4	1	4	1.6	4	1.6	4	1.6	3	1	3	0.8	33	9
C9J804	KRBOX4	KRAB domain-containing protein 4 (Fragment)	0	0	1	0.2	0	0	0	0	0	0	0	0	0	0	0	0	0	0	1	1
P04264	KRT1	Keratin, type II cytoskeletal 1	2	0.8	0	0	0	0	0	0	0	0	0	0	0	0	0	0	0	0	2	1
P13645	KRT10	Keratin, type I cytoskeletal 10	4	1.8	2	0.6	0	0	0	0	1	0.2	1	0.2	1	0.2	1	0.2	0	0	10	6
Q04695	KRT17	Keratin, type I cytoskeletal 17	1	0.4	1	0.4	0	0	0	0	1	0.4	1	0.2	0	0	1	0.4	0	0	5	5
P05783	KRT18	Keratin, type I cytoskeletal 18	4	1.4	2	0.6	0	0	0	0	1	0.2	1	0.2	1	0.2	1	0.2	0	0	10	6
P35908	KRT2	Keratin, type II cytoskeletal 2 epidermal	0	0	0	0	1	0.2	1	0.4	0	0	0	0	2	0.6	2	0.4	0	0	6	4
Q14532	KRT32	Keratin, type I cuticular Ha2	1	0.4	1	0.4	0	0	1	0.2	1	0.2	1	0.2	0	0	1	0.2	0	0	6	6
Q92764	KRT35	Keratin, type I cuticular Ha5	3	1	1	0.4	0	0	0	0	0	0	0	0	1	0.2	0	0	0	0	5	3
O76014	KRT37	Keratin, type I cuticular Ha7	1	0.4	1	0.4	0	0	0	0	1	0.2	1	0.2	1	0.2	1	0.2	0	0	6	6
P08729	KRT7	Keratin, type II cytoskeletal 7	1	0.2	1	0.2	2	0.4	0	0	1	0.2	0	0	3	0.6	1	0.2	3	0.8	12	7
Q3LI83	KRTAP24-1	Keratin-associated protein 24-1	0	0	0	0	0	0	0	0	0	0	0	0	0	0	1	0.2	0	0	1	1
Q9BYR5	KRTAP4-2	Keratin-associated protein 4-2	1	0.2	0	0	0	0	0	0	0	0	0	0	0	0	0	0	0	0	1	1
Q9BYQ2	KRTAP9-4	Keratin-associated protein 9-4	0	0	0	0	0	0	0	0	0	0	0	0	1	0.2	0	0	0	0	1	1
Q86UP2	KTN1	Kinectin	5	3.4	3	2	3	1.2	3	1.2	1	0.4	3	2.6	0	0	0	0	1	0.4	19	7
A0A494C066	KYAT1	Kynurenine--oxoglutarate transaminase 1	0	0	0	0	0	0	0	0	0	0	1	0.2	0	0	0	0	0	0	1	1
A0A087X1V4	LAIR2	Leukocyte-associated immunoglobulin-like receptor 2 (Fragment)	0	0	0	0	0	0	0	0	1	0.2	0	0	0	0	0	0	0	0	1	1
Q16787	LAMA3	Laminin subunit alpha-3	0	0	0	0	1	0.2	0	0	0	0	0	0	0	0	0	0	0	0	1	1
A0A0A0MQS9	LAMA4	Laminin subunit alpha-4	0	0	0	0	0	0	0	0	2	0.4	0	0	0	0	0	0	0	0	2	1
O15230	LAMA5	Laminin subunit alpha-5	0	0	0	0	0	0	0	0	0	0	0	0	1	0.2	0	0	0	0	1	1
G3XAI2	LAMB1	Laminin subunit beta-1	0	0	3	0.8	3	1	1	0.2	0	0	0	0	1	0.4	3	1.8	1	0.4	12	6
P11047	LAMC1	Laminin subunit gamma-1	2	0.4	1	0.2	4	0.8	1	0.2	1	0.4	2	0.4	2	0.6	2	0.4	2	0.4	17	9
P11279	LAMP1	Lysosome-associated membrane glycoprotein 1	3	0.8	1	0.2	1	0.4	3	0.6	2	0.6	1	0.2	1	0.2	5	1.2	3	1	20	9
P28838	LAP3	Cytosol aminopeptidase	0	0	0	0	1	0.4	0	0	0	0	1	0.2	0	0	0	0	1	0.2	3	3
P09848	LCT	Lactase-phlorizin hydrolase	0	0	1	0.2	0	0	0	0	0	0	0	0	0	0	0	0	0	0	1	1
P00338	LDHA	L-lactate dehydrogenase A chain	5	7	5	10.4	5	11.2	5	14.6	5	15	5	14.8	5	13.2	5	13	5	14	45	9
Q9BYZ2	LDHAL6B	L-lactate dehydrogenase A-like 6B	3	3.4	2	3	3	2.6	2	2	3	4.6	2	2.6	2	2.4	3	5.6	3	2.8	23	9
A0A5F9ZHM4	LDHB	L-lactate dehydrogenase	5	2.8	5	4.6	5	4.2	5	4	5	3	5	3.6	5	3.6	5	4.4	5	3.6	45	9
Q9Y5L5	LENEP	Lens epithelial cell protein LEP503	0	0	0	0	0	0	0	0	0	0	0	0	1	0.2	0	0	0	0	1	1
Q8WVC0	LEO1	RNA polymerase-associated protein LEO1	0	0	0	0	0	0	0	0	0	0	0	0	0	0	0	0	1	0.2	1	1
P48357	LEPR	Leptin receptor	0	0	0	0	0	0	0	0	0	0	1	0.2	0	0	0	0	0	0	1	1
O95202	LETM1	Mitochondrial proton/calcium exchanger protein	0	0	1	0.4	0	0	0	0	0	0	0	0	0	0	0	0	0	0	1	1
Q6P1Q0	LETMD1	LETM1 domain-containing protein 1	0	0	0	0	1	0.2	0	0	0	0	1	0.2	0	0	0	0	0	0	2	2
P09382	LGALS1	Galectin-1	5	1.8	4	1.8	4	2.2	5	2	2	0.4	5	2.6	5	1.8	5	1.8	5	3.2	40	9
Q08380	LGALS3BP	Galectin-3-binding protein	1	0.2	0	0	0	0	0	0	0	0	0	0	0	0	0	0	0	0	1	1
O95970	LGI1	Leucine-rich glioma-inactivated protein 1	0	0	0	0	1	0.2	0	0	0	0	0	0	0	0	0	0	0	0	1	1
Q99538	LGMN	Legumain	0	0	1	0.2	0	0	0	0	0	0	0	0	0	0	0	0	0	0	1	1
Q9UHB6	LIMA1	LIM domain and actin-binding protein 1	0	0	0	0	0	0	0	0	0	0	0	0	0	0	0	0	1	0.2	1	1
E9PC47	LIMK1	LIM domain kinase 1	0	0	0	0	0	0	0	0	0	0	0	0	0	0	1	0.2	0	0	1	1
A0A0J9YXC7	LIMS4	LIM and senescent cell antigen-like-containing domain protein	0	0	0	0	0	0	0	0	0	0	0	0	0	0	0	0	1	0.2	1	1
Q6ZUF6	LINC00336	Putative uncharacterized protein encoded by LINC00336	0	0	0	0	0	0	0	0	0	0	0	0	0	0	1	0.2	0	0	1	1
A8K010	LINC00473	Putative transcriptional regulator encoded by LINC00473	0	0	0	0	0	0	0	0	1	0.2	0	0	0	0	0	0	0	0	1	1
Q8TD35	LKAAEAR1	Protein LKAAEAR1	0	0	0	0	0	0	0	0	0	0	0	0	0	0	1	0.2	0	0	1	1
Q6P1M3	LLGL2	LLGL scribble cell polarity complex component 2	0	0	0	0	0	0	1	0.2	0	0	0	0	0	0	0	0	0	0	1	1
Q12907	LMAN2	Vesicular integral-membrane protein VIP36	0	0	0	0	1	0.2	0	0	0	0	1	0.2	0	0	0	0	0	0	2	2
A0A3B3ITP2	LMBRD1	Probable lysosomal cobalamin transporter	0	0	0	0	0	0	1	0.4	0	0	0	0	0	0	0	0	0	0	1	1
A0A1B0GTW7	LMLN2	Leishmanolysin-like peptidase 2	0	0	0	0	0	0	0	0	0	0	0	0	1	0.2	0	0	0	0	1	1
P02545	LMNA	Prelamin-A/C	5	20.8	5	17.8	5	16.6	5	16.8	5	13.8	5	17.8	5	13.6	5	12.6	5	17.6	45	9
P20700	LMNB1	Lamin-B1	0	0	0	0	1	0.2	1	0.2	1	0.2	0	0	0	0	0	0	0	0	3	3
P36776	LONP1	Lon protease homolog, mitochondrial	0	0	0	0	0	0	0	0	1	0.2	0	0	0	0	0	0	0	0	1	1
P43657	LPAR6	Lysophosphatidic acid receptor 6	0	0	0	0	0	0	1	0.2	0	0	0	0	1	0.2	1	0.2	0	0	3	3
O60711	LPXN	Leupaxin	0	0	0	0	0	0	0	0	0	0	0	0	0	0	0	0	1	0.2	1	1
Q6PJG9	LRFN4	Leucine-rich repeat and fibronectin type-III domain-containing protein 4	1	0.2	0	0	0	0	0	0	0	0	0	0	0	0	0	0	0	0	1	1
Q07954	LRP1	Prolow-density lipoprotein receptor-related protein 1	0	0	0	0	0	0	0	0	1	0.2	0	0	0	0	0	0	1	0.2	2	2
Q9NZR2	LRP1B	Low-density lipoprotein receptor-related protein 1B	1	0.2	0	0	0	0	0	0	0	0	0	0	0	0	0	0	0	0	1	1
P98164	LRP2	Low-density lipoprotein receptor-related protein 2	0	0	0	0	0	0	1	0.2	0	0	0	0	0	0	0	0	0	0	1	1
O75096	LRP4	Low-density lipoprotein receptor-related protein 4	0	0	0	0	0	0	0	0	0	0	1	0.2	0	0	0	0	0	0	1	1
C9JMC7	LRRC3B	Leucine-rich repeat-containing protein 3B (Fragment)	0	0	0	0	0	0	0	0	0	0	1	0.2	0	0	0	0	0	0	1	1
Q15345	LRRC41	Leucine-rich repeat-containing protein 41	0	0	1	0.2	0	0	0	0	0	0	0	0	0	0	0	0	0	0	1	1
Q96AG4	LRRC59	Leucine-rich repeat-containing protein 59	1	0.8	1	0.2	0	0	0	0	0	0	0	0	0	0	0	0	0	0	2	2
A0A075B6E9	LRRC7	Leucine-rich repeat-containing protein 7	0	0	0	0	1	0.2	0	0	0	0	0	0	0	0	0	0	0	0	1	1
Q0VAA2	LRRC74A	Leucine-rich repeat-containing protein 74A	0	0	0	0	0	0	1	0.2	0	0	0	0	0	0	0	0	0	0	1	1
A0A2R8Y4H4	LRRC9	Leucine-rich repeat-containing protein 9	0	0	0	0	0	0	0	0	0	0	0	0	1	0.2	0	0	0	0	1	1
O43300	LRRTM2	Leucine-rich repeat transmembrane neuronal protein 2	0	0	0	0	0	0	0	0	0	0	0	0	1	0.2	0	0	0	0	1	1
E9PRF2	LTBP3	Latent-transforming growth factor beta-binding protein 3	0	0	0	0	0	0	1	0.2	0	0	0	0	0	0	0	0	0	0	1	1
P02788	LTF	Lactotransferrin	0	0	0	0	0	0	0	0	0	0	0	0	1	0.2	0	0	0	0	1	1
Q6Q4G3	LVRN	Aminopeptidase Q	0	0	0	0	0	0	0	0	0	0	1	0.2	1	0.2	0	0	0	0	2	2
Q17RY6	LY6K	Lymphocyte antigen 6K	0	0	0	0	0	0	0	0	1	0.2	0	0	0	0	0	0	0	0	1	1
J3KTA2	LYRM9	Uncharacterized protein	0	0	0	0	1	0.2	0	0	0	0	0	0	0	0	0	0	0	0	1	1
Q5XG99	LYSMD4	LysM and putative peptidoglycan-binding domain-containing protein 4	0	0	0	0	0	0	0	0	0	0	0	0	1	0.2	0	0	1	0.2	2	2
Q13394	MAB21L1	Putative nucleotidyltransferase MAB21L1	0	0	0	0	0	0	0	0	0	0	1	0.2	0	0	0	0	0	0	1	1
Q8N5G2	MACO1	Macoilin	0	0	0	0	0	0	0	0	0	0	0	0	0	0	1	0.2	1	0.2	2	2
Q8WXG6	MADD	MAP kinase-activating death domain protein	0	0	0	0	0	0	1	0.2	0	0	0	0	0	0	0	0	0	0	1	1
Q9UNF1	MAGED2	Melanoma-associated antigen D2	0	0	0	0	1	0.2	0	0	0	0	0	0	0	0	0	0	1	0.2	2	2
A0A1B0GVS0	MAGI2	Membrane-associated guanylate kinase, WW and PDZ domain-containing protein 2 (Fragment)	0	0	0	0	0	0	0	0	0	0	1	0.2	0	0	0	0	0	0	1	1
P20794	MAK	Serine/threonine-protein kinase MAK	0	0	0	0	0	0	1	0.2	0	0	0	0	0	0	0	0	0	0	1	1
Q8IZL2	MAML2	Mastermind-like protein 2	2	0.4	1	0.2	1	0.2	2	0.4	0	0	1	0.2	1	0.2	0	0	0	0	8	6
Q6ZN01	MAMSTR	MEF2-activating motif and SAP domain-containing transcriptional regulator	0	0	0	0	0	0	0	0	1	0.2	0	0	0	0	0	0	0	0	1	1
O60476	MAN1A2	Mannosyl-oligosaccharide 1,2-alpha-mannosidase IB	0	0	0	0	0	0	1	0.2	0	0	0	0	0	0	0	0	0	0	1	1
Q9UKM7	MAN1B1	Endoplasmic reticulum mannosyl-oligosaccharide 1,2-alpha-mannosidase	0	0	1	0.2	0	0	1	0.2	0	0	0	0	0	0	0	0	0	0	2	2
H0YKQ2	MAN2A2	Alpha-mannosidase 2x (Fragment)	0	0	0	0	0	0	0	0	0	0	1	0.2	0	0	0	0	0	0	1	1
Q9NTJ4	MAN2C1	Alpha-mannosidase 2C1	0	0	0	0	0	0	0	0	0	0	0	0	0	0	1	0.2	0	0	1	1
Q9P2G4	MAP10	Microtubule-associated protein 10	0	0	1	0.2	0	0	0	0	0	0	0	0	0	0	0	0	0	0	1	1
Q99558	MAP3K14	Mitogen-activated protein kinase kinase kinase 14	0	0	0	0	0	0	0	0	0	0	0	0	1	0.2	0	0	0	0	1	1
P41279	MAP3K8	Mitogen-activated protein kinase kinase kinase 8	0	0	0	0	0	0	0	0	0	0	0	0	0	0	0	0	1	0.2	1	1
E7EVA0	MAP4	Microtubule-associated protein	4	2.2	5	5.4	2	1.6	1	0.8	2	0.8	2	0.8	2	0.8	0	0	2	0.6	20	8
Q92918	MAP4K1	Mitogen-activated protein kinase kinase kinase kinase 1	0	0	0	0	1	0.2	0	0	0	0	0	0	0	0	0	0	0	0	1	1
A0A0D9SEY1	MAP4K4	Mitogen-activated protein kinase kinase kinase kinase 4	0	0	0	0	0	0	0	0	1	0.2	0	0	0	0	0	0	0	0	1	1
P31152	MAPK4	Mitogen-activated protein kinase 4	1	0.2	0	0	0	0	0	0	0	0	0	0	0	0	0	0	0	0	1	1
O60336	MAPKBP1	Mitogen-activated protein kinase-binding protein 1	0	0	0	0	0	0	0	0	0	0	0	0	0	0	1	0.2	0	0	1	1
Q9P2E8	MARCHF4	E3 ubiquitin-protein ligase MARCHF4	1	0.2	0	0	0	0	0	0	0	0	0	0	0	0	0	0	0	0	1	1
P29966	MARCKS	Myristoylated alanine-rich C-kinase substrate	5	21.6	5	22.6	5	23.6	5	21.8	5	24.4	5	25.6	5	20.8	5	23.2	5	26.8	45	9
P49006	MARCKSL1	MARCKS-related protein	3	1.2	1	0.4	3	1.6	2	0.8	3	1.6	2	0.8	3	1.2	2	0.8	2	0.8	21	9
P56192	MARS1	Methionine--tRNA ligase, cytoplasmic	0	0	1	0.2	0	0	0	0	1	0.2	0	0	0	0	0	0	0	0	2	2
Q96GW9	MARS2	Methionine--tRNA ligase, mitochondrial	0	0	0	0	0	0	0	0	1	0.2	0	0	0	0	0	0	0	0	1	1
Q96GX5	MASTL	Serine/threonine-protein kinase greatwall	0	0	0	0	1	0.2	0	0	0	0	0	0	0	0	0	0	0	0	1	1
A8MXP9	MATR3	Matrin-3	2	0.4	1	0.2	2	0.4	0	0	1	0.2	1	0.2	0	0	2	0.4	1	0.2	10	7
Q9UIS9	MBD1	Methyl-CpG-binding domain protein 1	0	0	0	0	0	0	0	0	0	0	0	0	0	0	1	0.2	0	0	1	1
Q9NS73	MBIP	MAP3K12-binding inhibitory protein 1	0	0	0	0	0	0	0	0	0	0	0	0	0	0	0	0	1	0.2	1	1
P43121	MCAM	Cell surface glycoprotein MUC18	2	0.6	2	0.6	4	2	0	0	1	0.2	2	0.8	0	0	0	0	2	0.8	13	6
Q96RQ3	MCCC1	Methylcrotonoyl-CoA carboxylase subunit alpha, mitochondrial	0	0	0	0	0	0	1	0.2	0	0	0	0	1	0.2	0	0	0	0	2	2
Q4G0Z9	MCMDC2	Minichromosome maintenance domain-containing protein 2	0	0	0	0	0	0	0	0	0	0	0	0	1	0.2	0	0	0	0	1	1
P40926	MDH2	Malate dehydrogenase, mitochondrial	2	2	2	2	3	2.4	5	2.6	5	4	5	3.2	4	3.2	4	1.4	4	1.6	34	9
A0A087WXB6	MDK	Midkine	0	0	0	0	0	0	0	0	1	0.2	0	0	0	0	0	0	0	0	1	1
Q9NU22	MDN1	Midasin	1	0.2	0	0	0	0	0	0	0	0	0	0	0	0	0	0	0	0	1	1
Q16626	MEA1	Male-enhanced antigen 1	0	0	0	0	1	0.2	0	0	0	0	0	0	0	0	0	0	0	0	1	1
P51608	MECP2	Methyl-CpG-binding protein 2	0	0	1	0.4	0	0	0	0	1	0.4	0	0	0	0	0	0	0	0	2	2
B9TX03	MED16	Mediator complex subunit MED16 variant MED16_i10 (Fragment)	0	0	0	0	0	0	0	0	0	0	0	0	0	0	0	0	1	0.2	1	1
Q9BUE0	MED18	Mediator of RNA polymerase II transcription subunit 18	0	0	0	0	0	0	0	0	1	0.2	0	0	0	0	0	0	0	0	1	1
A0A0B4J1W0	MED24	Mediator of RNA polymerase II transcription subunit 24	0	0	0	0	0	0	1	0.2	0	0	0	0	0	0	0	0	0	0	1	1
F5H595	MEFV	Pyrin	0	0	0	0	1	0.2	0	0	0	0	0	0	0	0	0	0	0	0	1	1
P0C7V9	METTL15P1	Putative methyltransferase-like protein 15P1	0	0	0	0	0	0	0	0	0	0	0	0	0	0	1	0.2	0	0	1	1
A6NDL7	METTL21EP	Putative methyltransferase-like protein 21E pseudogene	0	0	0	0	0	0	0	0	1	0.2	0	0	0	0	0	0	0	0	1	1
B3KW44	METTL8	Methyltransferase-like protein	0	0	0	0	0	0	0	0	0	0	1	0.2	0	0	0	0	0	0	1	1
Q5U5Q3	MEX3C	RNA-binding E3 ubiquitin-protein ligase MEX3C	0	0	1	0.4	0	0	0	0	0	0	1	0.2	0	0	0	0	1	0.4	3	3
Q86XN8	MEX3D	RNA-binding protein MEX3D	0	0	0	0	0	0	0	0	0	0	0	0	0	0	1	0.2	0	0	1	1
O75121	MFAP3L	Microfibrillar-associated protein 3-like	0	0	0	0	0	0	1	0.2	0	0	0	0	0	0	0	0	0	0	1	1
Q8IWA4	MFN1	Mitofusin-1	0	0	0	0	0	0	0	0	1	0.2	0	0	0	0	0	0	0	0	1	1
D6RE79	MFSD10	Major facilitator superfamily domain-containing protein 10	0	0	0	0	0	0	0	0	0	0	0	0	1	0.2	0	0	0	0	1	1
Q8IWI9	MGA	MAX gene-associated protein	0	0	0	0	0	0	0	0	0	0	0	0	2	0.4	1	0.2	0	0	3	2
P10620	MGST1	Microsomal glutathione S-transferase 1	0	0	0	0	2	0.8	0	0	0	0	0	0	0	0	0	0	0	0	2	1
Q86YT6	MIB1	E3 ubiquitin-protein ligase MIB1	0	0	0	0	0	0	0	0	0	0	0	0	0	0	1	0.2	0	0	1	1
Q9NPA3	MID1IP1	Mid1-interacting protein 1	0	0	2	0.6	0	0	0	0	0	0	0	0	0	0	0	0	0	0	2	1
A0A1C7CYX1	MIDEAS	Mitotic deacetylase-associated SANT domain protein	0	0	0	0	0	0	0	0	1	0.4	0	0	0	0	0	0	0	0	1	1
P14174	MIF	Macrophage migration inhibitory factor	2	0.4	1	0.4	4	1	2	0.6	3	1	3	1.4	2	0.4	4	1	3	0.6	24	9
A0A3B3IU65	MIF4GD	MIF4G domain-containing protein	1	0.2	0	0	0	0	0	0	0	0	0	0	0	0	0	0	0	0	1	1
Q9H1L0	MIR1-1HG	Uncharacterized protein MIR1-1HG	0	0	0	0	0	0	0	0	0	0	0	0	1	0.2	0	0	0	0	1	1
Q6P0N0	MIS18BP1	Mis18-binding protein 1	0	0	0	0	0	0	0	0	0	0	1	0.2	0	0	0	0	0	0	1	1
O95822	MLYCD	Malonyl-CoA decarboxylase, mitochondrial	0	0	0	0	0	0	0	0	0	0	0	0	2	0.4	1	0.2	0	0	3	2
P39900	MMP12	Macrophage metalloelastase	0	0	0	0	1	0.2	0	0	0	0	0	0	1	0.2	0	0	0	0	2	2
F5GWR3	MMP17	Matrix metalloproteinase-17 (Fragment)	0	0	0	0	1	0.4	1	0.2	0	0	0	0	0	0	1	0.2	0	0	3	3
H0YJF2	MNAT1	CDK-activating kinase assembly factor MAT1 (Fragment)	0	0	0	0	0	0	0	0	0	0	1	0.4	0	0	0	0	0	0	1	1
Q70IA6	MOB2	MOB kinase activator 2	0	0	0	0	0	0	0	0	0	0	0	0	1	0.2	0	0	0	0	1	1
H3BUX9	MON1B	Vacuolar fusion protein MON1 homolog B (Fragment)	0	0	1	0.2	0	0	0	0	0	0	0	0	0	0	0	0	0	0	1	1
Q14149	MORC3	MORC family CW-type zinc finger protein 3	0	0	0	0	0	0	0	0	1	0.2	0	0	0	0	0	0	0	0	1	1
A6NFY0	MPP1	55 kDa erythrocyte membrane protein (Fragment)	0	0	0	0	0	0	0	0	0	0	0	0	0	0	1	0.2	0	0	1	1
P22897	MRC1	Macrophage mannose receptor 1	0	0	0	0	1	0.2	0	0	0	0	0	0	1	0.2	0	0	0	0	2	2
Q6IN84	MRM1	rRNA methyltransferase 1, mitochondrial	0	0	0	0	0	0	0	0	0	0	0	0	1	0.2	0	0	0	0	1	1
P52815	MRPL12	39S ribosomal protein L12, mitochondrial	0	0	0	0	0	0	1	0.4	0	0	0	0	1	0.2	0	0	0	0	2	2
Q9HD23	MRS2	Magnesium transporter MRS2 homolog, mitochondrial	0	0	0	0	0	0	1	0.2	0	0	0	0	0	0	0	0	0	0	1	1
E9PSA9	MS4A6A	Membrane-spanning 4-domains subfamily A member 6A	0	0	0	0	1	0.2	0	0	0	0	0	0	0	0	0	0	0	0	1	1
Q9GZW8	MS4A7	Membrane-spanning 4-domains subfamily A member 7	0	0	0	0	0	0	0	0	1	0.2	0	0	0	0	0	0	0	0	1	1
P26038	MSN	Moesin	5	10.8	5	10.6	5	14.4	5	9.2	5	11.2	5	11	5	11.8	5	11.2	5	11.4	45	9
Q04912	MST1R	Macrophage-stimulating protein receptor	0	0	0	0	0	0	0	0	0	0	0	0	1	0.2	0	0	0	0	1	1
P00395	MT-CO1	Cytochrome c oxidase subunit 1	0	0	0	0	0	0	0	0	0	0	0	0	0	0	1	0.4	1	0.4	2	2
P00403	MT-CO2	Cytochrome c oxidase subunit 2	2	0.6	1	0.2	0	0	0	0	1	0.2	0	0	1	0.2	2	0.4	0	0	7	5
Q15390	MTFR1	Mitochondrial fission regulator 1	0	0	0	0	0	0	1	0.2	0	0	0	0	0	0	0	0	0	0	1	1
Q9BT17	MTG1	Mitochondrial ribosome-associated GTPase 1	0	0	0	0	0	0	0	0	1	0.2	0	0	0	0	0	0	0	0	1	1
Q5SNW7	MTHFR	Methylenetetrahydrofolate reductase	0	0	0	0	0	0	0	0	0	0	1	0.2	0	0	0	0	0	0	1	1
F5H0M7	MTHFSD	Methenyltetrahydrofolate synthase domain-containing protein	0	0	0	0	0	0	0	0	1	0.2	0	0	0	0	0	0	0	0	1	1
Q13496	MTM1	Myotubularin	0	0	0	0	0	0	0	0	0	0	0	0	0	0	0	0	1	0.2	1	1
P58546	MTPN	Myotrophin	1	0.4	1	0.4	0	0	0	0	0	0	0	0	0	0	0	0	0	0	2	2
H0Y8U3	MTREX	Exosome RNA helicase MTR4 (Fragment)	0	0	0	0	0	0	0	0	0	0	0	0	0	0	0	0	1	0.2	1	1
O75570	MTRF1	Peptide chain release factor 1, mitochondrial	0	0	1	0.2	1	0.2	0	0	1	0.2	0	0	0	0	0	0	0	0	3	3
Q8WXI7	MUC16	Mucin-16	0	0	0	0	0	0	0	0	0	0	1	0.4	0	0	0	0	0	0	1	1
C9JJE7	MUC20	Mucin-20	0	0	0	0	0	0	0	0	0	0	1	0.2	0	0	0	0	0	0	1	1
A0A0G2JRD8	MUC4	Mucin-4	1	0.2	0	0	0	0	0	0	0	0	0	0	0	0	0	0	0	0	1	1
A0A0G2JN42	MUC6	Mucin-6	1	0.2	0	0	0	0	0	0	0	0	0	0	0	0	0	0	0	0	1	1
O15146	MUSK	Muscle, skeletal receptor tyrosine-protein kinase	0	0	0	0	0	0	0	0	0	0	0	0	0	0	1	0.2	0	0	1	1
Q14764	MVP	Major vault protein	3	1	2	1	0	0	3	1	3	1.2	1	0.2	4	1.8	3	1	1	0.4	20	8
P20591	MX1	Interferon-induced GTP-binding protein Mx1	0	0	0	0	0	0	0	0	0	0	5	5.8	0	0	0	0	0	0	5	1
Q9NR99	MXRA5	Matrix-remodeling-associated protein 5	0	0	0	0	0	0	0	0	0	0	1	0.2	0	0	0	0	1	0.2	2	2
Q9BRK3	MXRA8	Matrix remodeling-associated protein 8	1	0.2	0	0	0	0	0	0	0	0	0	0	0	0	0	0	0	0	1	1
M0QYN0	MYDGF	Myeloid-derived growth factor	0	0	1	0.4	0	0	0	0	0	0	0	0	0	0	1	0.4	0	0	2	2
P35749	MYH11	Myosin-11	2	6.8	3	7.4	2	5.8	3	6	2	5	3	9.2	3	9.8	2	4.8	2	7.6	22	9
Q7Z406	MYH14	Myosin-14	3	2.2	2	1.6	3	2.4	2	1.2	3	2.6	2	1.4	2	1.6	3	2.4	3	3.8	23	9
Q9Y2K3	MYH15	Myosin-15	0	0	0	0	0	0	0	0	0	0	0	0	0	0	0	0	1	0.2	1	1
Q9UKX2	MYH2	Myosin-2	0	0	1	0.4	0	0	0	0	0	0	1	0.2	0	0	0	0	0	0	2	2
Q9Y623	MYH4	Myosin-4	0	0	0	0	0	0	1	0.2	0	0	0	0	0	0	0	0	0	0	1	1
P13533	MYH6	Myosin-6	0	0	2	0.6	0	0	0	0	0	0	1	0.2	0	0	0	0	0	0	3	2
P35579	MYH9	Myosin-9	5	101.8	5	96	5	105	5	98.8	5	96.6	5	106.8	5	98.6	5	104	5	117.2	45	9
J3QRS3	MYL12A	Myosin regulatory light chain 12A	5	3	5	2.2	5	2.6	5	2	5	2.6	4	2.8	5	1.4	4	1.8	3	1.8	41	9
J3KND3	MYL6	Myosin light polypeptide 6	5	21.6	5	18	5	16.4	5	16.2	5	17.2	5	16.2	5	15.2	5	16.2	5	17.6	45	9
A0A0A0MQX1	MYO10	Unconventional myosin-X	0	0	0	0	0	0	1	0.2	0	0	0	0	0	0	0	0	0	0	1	1
Q8IUG5	MYO18B	Unconventional myosin-XVIIIb	0	0	1	0.2	0	0	0	0	0	0	0	0	0	0	0	0	0	0	1	1
O43795	MYO1B	Unconventional myosin-Ib	0	0	1	0.2	0	0	0	0	0	0	2	0.6	0	0	2	0.8	2	0.6	7	4
O00159	MYO1C	Unconventional myosin-Ic	1	0.4	0	0	0	0	0	0	0	0	2	0.4	1	0.4	1	0.2	0	0	5	4
A0A140TA25	MYO1H	Unconventional myosin-Ih	0	0	0	0	0	0	0	0	0	0	0	0	1	0.2	0	0	0	0	1	1
Q9NQX4	MYO5C	Unconventional myosin-Vc	0	0	0	0	2	0.4	1	0.2	0	0	0	0	2	0.6	0	0	0	0	5	3
M0R0P8	MYO9B	Unconventional myosin-IXb	4	2	4	1.6	5	3.2	3	1.6	5	1.8	5	3	4	2.4	4	1.6	4	1.8	38	9
Q8IZQ8	MYOCD	Myocardin	0	0	0	0	0	0	0	0	0	0	0	0	1	0.2	0	0	0	0	1	1
Q9NZM1	MYOF	Myoferlin	1	0.2	1	0.4	2	0.4	1	0.2	1	0.2	0	0	0	0	0	0	1	0.4	7	6
P52179	MYOM1	Myomesin-1	0	0	1	0.2	0	0	0	0	0	0	0	0	0	0	0	0	0	0	1	1
Q5VZE5	NAA35	N-alpha-acetyltransferase 35, NatC auxiliary subunit	0	0	0	0	0	0	1	0.2	0	0	0	0	0	0	0	0	0	0	1	1
Q9BQ15	NABP2	SOSS complex subunit B1	0	0	0	0	0	0	0	0	0	0	1	0.2	0	0	0	0	0	0	1	1
E9PAV3	NACA	Nascent polypeptide-associated complex subunit alpha, muscle-specific form	3	1.6	4	2.6	4	3.8	5	3.2	4	2.8	4	2	5	3.2	5	3.6	4	3.2	38	9
Q96BF6	NACC2	Nucleus accumbens-associated protein 2	0	0	0	0	0	0	0	0	0	0	0	0	0	0	1	0.2	0	0	1	1
Q9UK23	NAGPA	N-acetylglucosamine-1-phosphodiester alpha-N-acetylglucosaminidase	1	0.2	0	0	0	0	0	0	0	0	0	0	0	0	0	0	0	0	1	1
P43490	NAMPT	Nicotinamide phosphoribosyltransferase	5	3.4	5	2.6	4	2.8	3	2.4	4	2.2	4	4.4	5	2.4	5	3.4	4	2.8	39	9
Q5TBR1	NANS	Sialic acid synthase (Fragment)	0	0	0	0	0	0	0	0	1	0.2	0	0	0	0	0	0	0	0	1	1
P55209	NAP1L1	Nucleosome assembly protein 1-like 1	1	0.4	0	0	1	0.4	0	0	0	0	1	0.4	0	0	0	0	0	0	3	3
M0QXC5	NAPSA	Napsin-A (Fragment)	0	0	0	0	0	0	0	0	1	0.2	0	0	0	0	0	0	0	0	1	1
A0A088AWN8	NARF	Nuclear prelamin A recognition factor	1	0.2	1	0.4	0	0	0	0	0	0	0	0	0	0	0	0	0	0	2	2
P49321	NASP	Nuclear autoantigenic sperm protein	0	0	1	0.2	0	0	0	0	0	0	0	0	0	0	0	0	0	0	1	1
A0A0A0MTE8	NAV2	Neuron navigator 2	0	0	1	0.2	0	0	0	0	0	0	0	0	0	0	0	0	0	0	1	1
A0A087WVM6	NBPF4	Neuroblastoma breakpoint family member 4	0	0	0	0	0	0	1	0.2	0	0	0	0	0	0	0	0	0	0	1	1
Q14596	NBR1	Next to BRCA1 gene 1 protein	0	0	1	0.2	0	0	0	0	1	0.2	0	0	0	0	0	0	0	0	2	2
A0A087WTE4	NCAM1	Neural cell adhesion molecule 1	0	0	0	0	0	0	0	0	0	0	0	0	0	0	0	0	1	0.2	1	1
A0A0A0MS79	NCKAP5	Nck-associated protein 5	0	0	0	0	0	0	1	0.2	0	0	0	0	0	0	0	0	0	0	1	1
P19338	NCL	Nucleolin	5	9.2	5	6.8	5	6	5	5.4	5	4.8	5	6	4	6.4	5	4.2	5	5.6	44	9
Q15788	NCOA1	Nuclear receptor coactivator 1	0	0	1	0.4	0	0	0	0	0	0	0	0	0	0	0	0	0	0	1	1
A0A0G2JN63	NCR1	Natural cytotoxicity triggering receptor 1 (Fragment)	0	0	1	0.2	0	0	1	0.2	1	0.4	0	0	1	0.4	1	0.4	1	0.2	6	6
P51970	NDUFA8	NADH dehydrogenase [ubiquinone] 1 alpha subcomplex subunit 8	0	0	0	0	0	0	0	0	1	0.4	0	0	0	0	0	0	0	0	1	1
A0A3B3ISG8	NDUFA9	Ricin B-type lectin domain-containing protein	0	0	0	0	0	0	1	0.2	0	0	0	0	0	0	0	0	0	0	1	1
Q15223	NECTIN1	Nectin-1	0	0	0	0	0	0	1	0.2	0	0	0	0	0	0	0	0	1	0.2	2	2
Q15843	NEDD8	NEDD8	0	0	1	0.2	0	0	0	0	0	0	0	0	0	0	0	0	0	0	1	1
Q6ZWH5	NEK10	Serine/threonine-protein kinase Nek10	0	0	1	0.4	0	0	0	0	1	0.2	0	0	0	0	1	0.4	1	0.2	4	4
A0A0C4DFX9	NELFA	Negative elongation factor A	0	0	0	0	1	0.2	0	0	0	0	0	0	1	0.2	0	0	0	0	2	2
P18615	NELFE	Negative elongation factor E	0	0	0	0	0	0	0	0	0	0	0	0	0	0	0	0	1	0.2	1	1
P48681	NES	Nestin	5	5.4	5	4.4	5	6.6	5	5.8	5	4.8	5	6.8	5	5.4	5	4.4	5	5.8	45	9
Q5QGS0	NEXMIF	Neurite extension and migration factor	0	0	0	0	0	0	0	0	0	0	0	0	0	0	0	0	1	0.2	1	1
Q0ZGT2	NEXN	Nexilin	0	0	0	0	1	0.2	0	0	0	0	0	0	0	0	0	0	0	0	1	1
J3QSG6	NF1	Neurofibromin (Fragment)	0	0	0	0	0	0	0	0	0	0	0	0	1	0.2	0	0	0	0	1	1
J9JIE5	NFE2L1	Endoplasmic reticulum membrane sensor NFE2L1	0	0	0	0	1	0.2	0	0	0	0	0	0	0	0	0	0	0	0	1	1
K7EIW5	NFE2L2	Nuclear factor erythroid 2-related factor 2 (Fragment)	1	0.2	0	0	0	0	0	0	0	0	0	0	0	0	0	0	0	0	1	1
Q96IV0	NGLY1	Peptide-N(4)-(N-acetyl-beta-glucosaminyl)asparagine amidase	0	0	0	0	0	0	0	0	0	0	0	0	0	0	1	0.2	0	0	1	1
Q14112	NID2	Nidogen-2	0	0	0	0	0	0	1	0.2	0	0	0	0	0	0	0	0	0	0	1	1
Q8IY84	NIM1K	Serine/threonine-protein kinase NIM1	0	0	0	0	0	0	1	0.2	0	0	0	0	0	0	0	0	0	0	1	1
Q6NVV3	NIPAL1	Magnesium transporter NIPA3	0	0	0	0	0	0	1	0.2	0	0	0	0	0	0	0	0	0	0	1	1
H7BXP1	NKIRAS2	NF-kappa-B inhibitor-interacting Ras-like protein 2	0	0	1	0.2	0	0	0	0	0	0	0	0	0	0	0	0	0	0	1	1
Q17RQ9	NKPD1	NTPase KAP family P-loop domain-containing protein 1	0	0	0	0	0	0	0	0	1	0.2	0	0	0	0	0	0	0	0	1	1
Q9NVX2	NLE1	Notchless protein homolog 1	0	0	0	0	0	0	0	0	0	0	0	0	0	0	0	0	1	0.2	1	1
Q8N0W4	NLGN4X	Neuroligin-4, X-linked	1	0.2	0	0	0	0	0	0	0	0	0	0	0	0	0	0	0	0	1	1
A0A0G2JPQ2	NLRP2	NACHT, LRR and PYD domains-containing protein 2	0	0	1	0.2	0	0	0	0	0	0	0	0	0	0	0	0	0	0	1	1
A0A087WXM3	NLRP5	NACHT, LRR and PYD domains-containing protein 5	0	0	1	0.2	1	0.2	0	0	0	0	0	0	0	0	0	0	0	0	2	2
C9JA08	NMD3	60S ribosomal export protein NMD3	0	0	0	0	0	0	0	0	0	0	1	0.2	0	0	0	0	0	0	1	1
P15531	NME1	Nucleoside diphosphate kinase A	4	1.4	4	1.6	5	2.4	5	2.8	5	3.2	5	2.2	5	2.6	5	1.8	5	2.4	43	9
Q32Q12	NME1-NME2	Nucleoside diphosphate kinase	5	10.8	5	5.2	5	9.6	5	10.4	5	8.8	5	9.6	5	11.8	5	8	5	8.6	45	9
Q86XW9	NME9	Thioredoxin domain-containing protein 6	0	0	0	0	0	0	0	0	0	0	0	0	1	0.2	0	0	0	0	1	1
O60551	NMT2	Glycylpeptide N-tetradecanoyltransferase 2	1	0.2	0	0	0	0	0	0	0	0	0	0	0	0	0	0	0	0	1	1
P40261	NNMT	Nicotinamide N-methyltransferase	0	0	0	0	2	0.4	0	0	0	0	1	0.2	0	0	0	0	0	0	3	2
Q13423	NNT	NAD(P) transhydrogenase, mitochondrial	0	0	0	0	0	0	0	0	0	0	0	0	0	0	1	0.2	0	0	1	1
H3BPS9	NOMO2	Nodal modulator 2 (Fragment)	0	0	0	0	0	0	1	0.2	0	0	0	0	0	0	0	0	1	0.2	2	2
Q15233	NONO	Non-POU domain-containing octamer-binding protein	5	2.2	5	2.4	5	2.2	5	2.6	5	2	5	2.6	5	2.2	5	2.2	5	3	45	9
P46087	NOP2	Probable 28S rRNA (cytosine(4447)-C(5))-methyltransferase	0	0	0	0	0	0	0	0	0	0	0	0	0	0	1	0.2	0	0	1	1
O00567	NOP56	Nucleolar protein 56	0	0	0	0	1	0.2	0	0	0	0	0	0	0	0	0	0	0	0	1	1
Q9Y2X3	NOP58	Nucleolar protein 58	1	0.2	0	0	0	0	1	0.4	0	0	2	0.8	2	0.8	1	0.8	0	0	7	5
F8WCW8	NOSTRIN	Nostrin	0	0	1	0.2	0	0	0	0	0	0	1	0.2	0	0	0	0	0	0	2	2
A8MTQ0	NOTO	Homeobox protein notochord	0	0	0	0	0	0	0	0	0	0	0	0	0	0	0	0	1	0.2	1	1
O15118	NPC1	NPC intracellular cholesterol transporter 1	0	0	0	0	0	0	1	0.2	0	0	0	0	0	0	0	0	0	0	1	1
Q9UHC9	NPC1L1	NPC1-like intracellular cholesterol transporter 1	1	0.2	0	0	0	0	0	0	0	0	0	0	1	0.2	0	0	0	0	2	2
Q8NDH3	NPEPL1	Probable aminopeptidase NPEPL1	1	0.2	0	0	0	0	0	0	0	0	0	0	0	0	2	0.4	1	0.2	4	3
Q9Y5X5	NPFFR2	Neuropeptide FF receptor 2	1	0.2	0	0	0	0	0	0	0	0	0	0	0	0	0	0	0	0	1	1
Q7Z494	NPHP3	Nephrocystin-3	0	0	0	0	0	0	0	0	0	0	0	0	0	0	0	0	1	0.2	1	1
Q8TAT6	NPLOC4	Nuclear protein localization protein 4 homolog	0	0	0	0	1	0.4	0	0	0	0	0	0	0	0	0	0	0	0	1	1
P06748	NPM1	Nucleophosmin	5	8.2	5	8	5	6.6	5	9.4	5	5.8	5	6.4	5	8	5	4.2	5	7	45	9
Q12980	NPRL3	GATOR complex protein NPRL3	0	0	0	0	0	0	0	0	0	0	1	0.2	0	0	0	0	0	0	1	1
Q15761	NPY5R	Neuropeptide Y receptor type 5	0	0	1	0.2	0	0	0	0	0	0	0	0	0	0	0	0	0	0	1	1
P15559	NQO1	NAD(P)H dehydrogenase [quinone] 1	4	2.8	3	1.2	3	2.6	4	2.2	4	1.4	3	1.6	4	2	4	1.6	3	1.2	32	9
Q9NSY0	NRBP2	Nuclear receptor-binding protein 2	1	0.2	0	0	0	0	0	0	0	0	0	0	0	0	0	0	0	0	1	1
Q92823	NRCAM	Neuronal cell adhesion molecule	0	0	0	0	0	0	1	0.2	0	0	0	0	0	0	0	0	0	0	1	1
P48552	NRIP1	Nuclear receptor-interacting protein 1	1	0.2	0	0	0	0	0	0	0	0	0	0	0	0	0	0	0	0	1	1
E7ERL8	NRXN1	Neurexin-1-beta	0	0	0	0	0	0	0	0	0	0	0	0	1	0.2	0	0	0	0	1	1
Q96L73	NSD1	Histone-lysine N-methyltransferase, H3 lysine-36 specific	1	0.2	0	0	0	0	0	0	0	0	0	0	0	0	0	0	0	0	1	1
Q6ZRQ1	NSUN4	5-methylcytosine rRNA methyltransferase NSUN4	0	0	1	0.2	1	0.4	0	0	0	0	0	0	0	0	0	0	0	0	2	2
P21589	NT5E	5'-nucleotidase	0	0	0	0	0	0	0	0	0	0	1	0.2	0	0	0	0	0	0	1	1
O95631	NTN1	Netrin-1	0	0	0	0	0	0	0	0	1	0.2	0	0	0	0	0	0	0	0	1	1
O60285	NUAK1	NUAK family SNF1-like kinase 1	0	0	0	0	0	0	0	0	0	0	0	0	1	0.2	0	0	0	0	1	1
Q9Y266	NUDC	Nuclear migration protein nudC	2	0.4	0	0	1	0.2	3	0.8	0	0	0	0	1	0.2	1	0.2	1	0.2	9	6
Q96RS6	NUDCD1	NudC domain-containing protein 1	0	0	1	0.2	0	0	1	0.2	0	0	0	0	0	0	0	0	0	0	2	2
Q5SRE5	NUP188	Nucleoporin NUP188 homolog	1	0.2	0	0	0	0	0	0	0	0	0	0	0	0	0	0	0	0	1	1
C9IYQ7	NUP35	Nucleoporin NUP35 (Fragment)	0	0	0	0	1	0.2	0	0	0	0	0	0	0	0	0	0	0	0	1	1
P61970	NUTF2	Nuclear transport factor 2	2	0.6	2	0.8	1	0.2	0	0	1	0.4	1	0.2	2	0.6	5	2	3	1.2	17	8
Q9H4D5	NXF3	Nuclear RNA export factor 3	1	0.2	0	0	0	0	0	0	0	0	0	0	0	0	0	0	0	0	1	1
I6L893	OC90	Uncharacterized protein	1	0.4	1	0.2	0	0	0	0	0	0	0	0	0	0	0	0	0	0	2	2
Q5BJF6	ODF2	Outer dense fiber protein 2	0	0	0	0	1	0.2	0	0	0	0	0	0	0	0	0	0	0	0	1	1
Q5SWX8	ODR4	Protein odr-4 homolog	0	0	0	0	0	0	1	0.2	0	0	0	0	0	0	0	0	0	0	1	1
Q6UWY5	OLFML1	Olfactomedin-like protein 1	0	0	0	0	0	0	0	0	0	0	0	0	0	0	1	0.2	0	0	1	1
P47874	OMP	Olfactory marker protein	1	0.2	0	0	0	0	0	0	0	0	0	0	0	0	0	0	0	0	1	1
O14841	OPLAH	5-oxoprolinase	1	0.2	0	0	0	0	0	0	0	0	0	0	0	0	0	0	0	0	1	1
Q8NGC1	OR11G2	Olfactory receptor 11G2	1	0.2	0	0	0	0	0	0	0	0	0	0	0	0	0	0	0	0	1	1
Q8NGT0	OR13C9	Olfactory receptor 13C9	0	0	0	0	0	0	0	0	0	0	0	0	0	0	1	0.2	0	0	1	1
Q8NHC7	OR14C36	Olfactory receptor 14C36	0	0	0	0	0	0	0	0	0	0	0	0	1	0.2	0	0	0	0	1	1
O95047	OR2A4	Olfactory receptor 2A4	1	0.2	0	0	0	0	0	0	0	0	0	0	0	0	0	0	0	0	1	1
A0A494BX18	OR2K2	Olfactory receptor	0	0	0	0	1	0.2	0	0	0	0	0	0	0	0	0	0	0	0	1	1
P47888	OR3A3	Olfactory receptor 3A3	1	0.2	0	0	0	0	0	0	0	0	0	0	1	0.2	0	0	0	0	2	2
P47883	OR3A4P	Putative olfactory receptor 3A4	0	0	1	0.2	0	0	0	0	0	0	0	0	0	0	0	0	0	0	1	1
Q6IF82	OR4A47	Olfactory receptor 4A47	0	0	1	0.2	0	0	0	0	0	0	0	0	0	0	0	0	0	0	1	1
Q15615	OR4D1	Olfactory receptor 4D1	0	0	0	0	0	0	0	0	0	0	0	0	0	0	1	0.2	0	0	1	1
Q8N0Y3	OR4N4	Olfactory receptor 4N4	0	0	0	0	0	0	1	0.4	0	0	0	0	0	0	0	0	0	0	1	1
A6NGY5	OR51F1	Olfactory receptor 51F1	0	0	0	0	0	0	0	0	0	0	2	0.4	0	0	0	0	1	0.2	3	2
A0A0C4DFX5	OR51T1	Olfactory receptor	1	0.2	0	0	0	0	0	0	0	0	0	0	0	0	0	0	0	0	1	1
Q8NGJ2	OR52H1	Olfactory receptor 52H1	1	0.2	0	0	0	0	0	0	0	0	0	0	0	0	0	0	0	0	1	1
Q8NH67	OR52I2	Olfactory receptor 52I2	0	0	0	0	0	0	0	0	0	0	0	0	1	0.2	0	0	0	0	1	1
Q8NGF1	OR52R1	Olfactory receptor 52R1	0	0	0	0	1	0.2	0	0	0	0	0	0	0	0	0	0	0	0	1	1
P0C646	OR52Z1	Olfactory receptor 52Z1	0	0	1	0.2	0	0	0	0	0	0	0	0	0	0	0	0	0	0	1	1
Q8NGF4	OR5AP2	Olfactory receptor 5AP2	0	0	0	0	0	0	0	0	0	0	1	0.2	0	0	0	0	0	0	1	1
Q8NGV6	OR5H6	Olfactory receptor 5H6	0	0	0	0	0	0	0	0	1	0.2	0	0	0	0	0	0	0	0	1	1
P0DN80	OR5H8	Olfactory receptor 5H8	0	0	1	0.2	0	0	0	0	0	0	0	0	0	0	0	0	0	0	1	1
Q8NGL2	OR5L1	Olfactory receptor 5L1	0	0	0	0	0	0	0	0	0	0	0	0	0	0	1	0.4	0	0	1	1
Q8NG98	OR7D4	Olfactory receptor 7D4	0	0	0	0	0	0	0	0	0	0	0	0	0	0	0	0	1	0.2	1	1
P0C7N5	OR8U9	Olfactory receptor 8U9	0	0	0	0	0	0	0	0	0	0	0	0	1	0.2	1	0.2	1	0.2	3	3
O43929	ORC4	Origin recognition complex subunit 4	2	0.4	0	0	0	0	0	0	0	0	0	0	0	0	0	0	0	0	2	1
Q8N138	ORMDL3	ORM1-like protein 3	0	0	0	0	0	0	0	0	0	0	0	0	0	0	0	0	1	0.2	1	1
P22059	OSBP	Oxysterol-binding protein 1	1	0.2	0	0	0	0	0	0	0	0	1	0.2	0	0	0	0	0	0	2	2
Q6ZRI0	OTOG	Otogelin	0	0	0	0	0	0	0	0	0	0	0	0	1	0.2	0	0	0	0	1	1
Q7RTZ1	OVCH2	Ovochymase-2	0	0	1	0.2	0	0	0	0	0	0	0	0	0	0	0	0	0	0	1	1
Q9BRP0	OVOL2	Transcription factor Ovo-like 2	0	0	0	0	0	0	0	0	0	0	0	0	1	0.2	0	0	0	0	1	1
O00110	OVOL3	Putative transcription factor ovo-like protein 3	0	0	0	0	1	0.2	0	0	0	0	0	0	0	0	0	0	0	0	1	1
A0A0G2JMS6	OVOS2	Uncharacterized protein	0	0	0	0	0	0	0	0	0	0	0	0	0	0	0	0	1	0.2	1	1
Q99571	P2RX4	P2X purinoceptor 4	1	0.2	0	0	2	0.4	0	0	0	0	1	0.2	0	0	0	0	1	0.2	5	4
P47900	P2RY1	P2Y purinoceptor 1	0	0	0	0	0	0	0	0	2	0.4	0	0	0	0	0	0	0	0	2	1
P07237	P4HB	Protein disulfide-isomerase	5	19.2	5	15.4	5	15.6	5	16.4	5	12.6	5	17	5	17	5	14.6	5	13.6	45	9
Q9H8K7	PAAT	ATPase PAAT	1	0.2	0	0	0	0	0	0	0	0	0	0	0	0	0	0	0	0	1	1
P11940	PABPC1	Polyadenylate-binding protein 1	0	0	0	0	0	0	0	0	0	0	0	0	1	0.2	0	0	1	0.2	2	2
Q13310	PABPC4	Polyadenylate-binding protein 4	1	0.2	0	0	0	0	0	0	1	0.2	0	0	0	0	0	0	0	0	2	2
B1AQ67	PADI4	Protein-arginine deiminase type-4	1	0.2	0	0	0	0	0	0	0	0	0	0	0	0	0	0	0	0	1	1
Q6TGC4	PADI6	Protein-arginine deiminase type-6	0	0	0	0	0	0	1	0.4	0	0	0	0	0	0	0	0	0	0	1	1
Q86YC2	PALB2	Partner and localizer of BRCA2	0	0	1	0.2	0	0	0	0	0	0	0	0	0	0	0	0	0	0	1	1
Q9ULE6	PALD1	Paladin	0	0	0	0	1	0.2	0	0	0	0	0	0	0	0	0	0	0	0	1	1
B1ALY0	PALM2AKAP2	PALM2 and AKAP2 fusion (Fragment)	0	0	0	0	0	0	0	0	1	0.2	0	0	0	0	0	0	0	0	1	1
P19021	PAM	Peptidyl-glycine alpha-amidating monooxygenase	0	0	0	0	0	0	1	0.2	0	0	0	0	0	0	0	0	0	0	1	1
Q6UXH9	PAMR1	Inactive serine protease PAMR1	0	0	2	0.6	2	0.6	1	0.2	1	0.2	1	0.2	0	0	1	0.2	1	0.4	9	7
Q9BWT3	PAPOLG	Poly(A) polymerase gamma	0	0	0	0	0	0	0	0	0	0	1	0.2	0	0	0	0	0	0	1	1
O43252	PAPSS1	Bifunctional 3'-phosphoadenosine 5'-phosphosulfate synthase 1	0	0	0	0	0	0	0	0	1	0.2	0	0	0	0	0	0	0	0	1	1
Q8TEW8	PARD3B	Partitioning defective 3 homolog B	0	0	1	0.4	0	0	1	0.2	0	0	0	0	1	0.2	0	0	0	0	3	3
Q99497	PARK7	Parkinson disease protein 7	1	0.4	2	0.6	1	0.4	2	1	3	1	2	2	2	0.4	5	1.2	3	1	21	9
Q8IXQ6	PARP9	Protein mono-ADP-ribosyltransferase PARP9	1	0.2	0	0	0	0	0	0	0	0	0	0	0	0	0	0	0	0	1	1
Q5T173	PBXIP1	Pre-B-cell leukemia transcription factor-interacting protein 1	0	0	1	0.2	0	0	1	0.2	1	0.2	0	0	0	0	0	0	0	0	3	3
Q15365	PCBP1	Poly(rC)-binding protein 1	4	1	3	0.8	5	1.8	2	0.6	3	0.6	5	1.6	4	1.2	1	0.4	4	1.4	31	9
Q15366	PCBP2	Poly(rC)-binding protein 2	4	2.2	5	2.4	5	2.8	4	2	5	2.4	5	2	5	2.6	5	2.4	5	3.4	43	9
Q9NRJ7	PCDHB16	Protocadherin beta-16	0	0	0	0	0	0	0	0	0	0	1	0.2	0	0	0	0	0	0	1	1
Q9BSM1	PCGF1	Polycomb group RING finger protein 1	0	0	1	0.2	0	0	0	0	0	0	0	0	0	0	0	0	0	0	1	1
H0YKC4	PCK2	Phosphoenolpyruvate carboxykinase [GTP], mitochondrial	0	0	1	0.2	2	0.6	0	0	1	0.2	3	0.6	1	0.2	1	0.2	2	0.4	11	7
Q15154	PCM1	Pericentriolar material 1 protein	0	0	0	0	0	0	0	0	0	0	0	0	0	0	0	0	1	0.2	1	1
P12004	PCNA	Proliferating cell nuclear antigen	0	0	1	0.4	0	0	0	0	0	0	0	0	0	0	0	0	0	0	1	1
A6NKB5	PCNX2	Pecanex-like protein 2	2	0.4	0	0	0	0	0	0	0	0	0	0	0	0	0	0	0	0	2	1
P16519	PCSK2	Neuroendocrine convertase 2	0	0	0	0	0	0	0	0	0	0	0	0	0	0	1	0.2	0	0	1	1
Q6UW60	PCSK4	Proprotein convertase subtilisin/kexin type 4	1	0.2	0	0	0	0	0	0	0	0	0	0	0	0	0	0	0	0	1	1
A0A3B3IUD7	PDCD11	Programmed cell death 11, isoform CRA_a	0	0	1	0.2	0	0	0	0	1	0.2	0	0	0	0	0	0	0	0	2	2
Q16342	PDCD2	Programmed cell death protein 2	0	0	1	0.2	0	0	0	0	0	0	0	0	0	0	1	0.2	0	0	2	2
Q8WUM4	PDCD6IP	Programmed cell death 6-interacting protein	0	0	1	0.4	0	0	1	0.4	3	1.2	1	0.8	2	0.8	4	2	0	0	12	6
O60658	PDE8A	High affinity cAMP-specific and IBMX-insensitive 3',5'-cyclic phosphodiesterase 8A	0	0	0	0	0	0	0	0	0	0	0	0	0	0	1	0.2	0	0	1	1
P30101	PDIA3	Protein disulfide-isomerase A3	5	5.4	5	5.6	5	6	5	4.6	5	5	5	5.8	5	6	5	6.6	5	7.4	45	9
P13667	PDIA4	Protein disulfide-isomerase A4	5	7.2	5	5.2	5	6.2	5	6.4	5	5	5	6.6	5	4.4	5	5.6	5	7.4	45	9
Q15084	PDIA6	Protein disulfide-isomerase A6	5	6.2	5	6.4	5	6.4	5	4.4	5	5.8	5	5.8	5	7.4	5	5.6	5	8.2	45	9
O00151	PDLIM1	PDZ and LIM domain protein 1	1	0.4	0	0	2	1.4	1	0.2	1	0.4	2	1.2	2	0.6	0	0	0	0	9	6
P50479	PDLIM4	PDZ and LIM domain protein 4	0	0	0	0	1	0.2	0	0	0	0	0	0	0	0	0	0	0	0	1	1
Q96HC4	PDLIM5	PDZ and LIM domain protein 5	1	0.2	1	0.2	0	0	2	0.8	1	0.2	1	0.2	1	0.2	1	0.2	2	0.6	10	8
Q9UPQ7	PDZRN3	E3 ubiquitin-protein ligase PDZRN3	0	0	0	0	0	0	1	0.2	1	0.2	0	0	1	0.2	0	0	0	0	3	3
Q15121	PEA15	Astrocytic phosphoprotein PEA-15	0	0	0	0	2	0.4	1	0.4	1	0.4	0	0	0	0	1	0.4	0	0	5	4
P30086	PEBP1	Phosphatidylethanolamine-binding protein 1	0	0	0	0	2	0.4	1	0.2	0	0	0	0	1	0.4	1	0.4	1	0.4	6	5
P16284	PECAM1	Platelet endothelial cell adhesion molecule	2	0.4	4	2.6	5	3.4	3	2	2	0.6	4	2.2	3	0.8	5	2.4	4	2.8	32	9
Q9BRX2	PELO	Protein pelota homolog	1	0.2	0	0	0	0	0	0	0	0	0	0	0	0	0	0	0	0	1	1
C9JFV4	PELP1	Proline-, glutamic acid- and leucine-rich protein 1	1	0.2	0	0	0	0	0	0	0	0	0	0	1	0.2	0	0	0	0	2	2
O60683	PEX10	Peroxisome biogenesis factor 10	0	0	0	0	0	0	0	0	0	0	0	0	1	0.2	0	0	0	0	1	1
O75381	PEX14	Peroxisomal membrane protein PEX14	0	0	0	0	0	0	0	0	1	0.2	0	0	0	0	0	0	0	0	1	1
O00628	PEX7	Peroxisomal targeting signal 2 receptor	0	0	0	0	1	0.2	0	0	0	0	0	0	0	0	0	0	0	0	1	1
Q01813	PFKP	ATP-dependent 6-phosphofructokinase, platelet type	3	0.8	1	0.2	3	1.6	2	0.6	3	0.6	2	0.4	3	1.6	4	0.8	2	0.4	23	9
P07737	PFN1	Profilin-1	5	7	5	6	5	5.8	5	8	5	7.2	5	8.6	5	7.4	5	7.2	5	6.6	45	9
P18669	PGAM1	Phosphoglycerate mutase 1	5	4.2	5	4	5	4.6	5	4	5	4.4	5	4	5	4.4	5	4.8	5	4.6	45	9
P15259	PGAM2	Phosphoglycerate mutase 2	2	0.8	2	0.8	3	1.2	2	0.6	3	1	1	0.2	2	0.6	3	0.8	3	1	21	9
Q75T13	PGAP1	GPI inositol-deacylase	0	0	0	0	0	0	0	0	0	0	0	0	0	0	0	0	1	0.2	1	1
P52209	PGD	6-phosphogluconate dehydrogenase, decarboxylating	5	12.4	5	11	5	16.8	5	13.2	5	16.4	5	18.6	5	15.4	5	14	5	14.2	45	9
P00558	PGK1	Phosphoglycerate kinase 1	5	7.2	5	8.4	5	4.8	5	4.4	5	6.6	5	8.2	5	7.2	5	6.4	5	5.4	45	9
Q96LB9	PGLYRP3	Peptidoglycan recognition protein 3	0	0	0	0	0	0	0	0	0	0	0	0	0	0	0	0	1	0.2	1	1
A6NDG6	PGP	Glycerol-3-phosphate phosphatase	1	0.2	0	0	0	0	0	0	0	0	0	0	0	0	0	0	0	0	1	1
Q99623	PHB2	Prohibitin-2	5	4	5	4	5	4	5	4	5	4	5	4	5	4	5	4	5	4	45	9
Q8NDX5	PHC3	Polyhomeotic-like protein 3	0	0	0	0	0	0	0	0	0	0	0	0	1	0.2	0	0	0	0	1	1
A0A0D9SGE8	PHF6	PHD finger protein 6	0	0	1	0.4	0	0	0	0	1	0.4	0	0	1	0.4	0	0	0	0	3	3
O60346	PHLPP1	PH domain leucine-rich repeat-containing protein phosphatase 1	0	0	0	0	1	0.2	1	0.2	0	0	0	0	0	0	0	0	0	0	2	2
A0A2R8Y3N5	PIEZO2	Piezo-type mechanosensitive ion channel component 2 (Fragment)	0	0	0	0	0	0	0	0	1	0.2	0	0	0	0	0	0	0	0	1	1
Q9Y2B2	PIGL	N-acetylglucosaminyl-phosphatidylinositol de-N-acetylase	1	0.2	0	0	0	0	0	0	0	0	0	0	0	0	0	0	0	0	1	1
A0A1W2PR73	PIGT	GPI transamidase component PIG-T (Fragment)	0	0	0	0	0	0	0	0	0	0	0	0	0	0	0	0	1	0.2	1	1
F5H369	PIK3C2G	Phosphatidylinositol 4-phosphate 3-kinase C2 domain-containing subunit gamma	0	0	0	0	1	0.2	0	0	0	0	0	0	0	0	0	0	0	0	1	1
A0A1W2PS05	PIK3C3	Phosphatidylinositol 3-kinase catalytic subunit type 3	0	0	1	0.2	0	0	0	0	0	0	0	0	0	0	0	0	0	0	1	1
Q99570	PIK3R4	Phosphoinositide 3-kinase regulatory subunit 4	0	0	1	0.2	0	0	0	0	1	0.2	0	0	0	0	0	0	0	0	2	2
O00625	PIR	Pirin	3	1.2	2	0.8	5	4	1	0.4	5	2	4	1.6	3	1.2	2	0.8	4	2.4	29	9
O00562	PITPNM1	Membrane-associated phosphatidylinositol transfer protein 1	0	0	2	0.4	0	0	0	0	0	0	0	0	0	0	1	0.2	0	0	3	2
U3KQ81	PITX2	Pituitary homeobox 2	0	0	0	0	0	0	1	0.2	0	0	0	0	1	0.2	0	0	1	0.2	3	3
Q8TC59	PIWIL2	Piwi-like protein 2	0	0	0	0	1	0.2	0	0	0	0	0	0	0	0	1	0.2	0	0	2	2
P98161	PKD1	Polycystin-1	0	0	0	0	0	0	0	0	1	0.2	0	0	0	0	0	0	0	0	1	1
Q8TDX9	PKD1L1	Polycystic kidney disease protein 1-like 1	1	0.2	0	0	0	0	0	0	0	0	0	0	0	0	0	0	0	0	1	1
Q86WI1	PKHD1L1	Fibrocystin-L	0	0	0	0	0	0	0	0	0	0	0	0	2	0.4	0	0	0	0	2	1
P14618	PKM	Pyruvate kinase PKM	5	20.6	5	14.4	5	23.8	5	22.6	5	24.4	5	25	5	21.4	5	19	5	26.8	45	9
Q9P212	PLCE1	1-phosphatidylinositol 4,5-bisphosphate phosphodiesterase epsilon-1	0	0	0	0	0	0	0	0	0	0	0	0	0	0	1	0.2	0	0	1	1
Q4KWH8	PLCH1	1-phosphatidylinositol 4,5-bisphosphate phosphodiesterase eta-1	0	0	0	0	0	0	0	0	0	0	0	0	1	0.2	0	0	0	0	1	1
Q8N7P1	PLD5	Inactive phospholipase D5	0	0	1	0.4	0	0	0	0	1	0.2	0	0	0	0	0	0	0	0	2	2
Q15149	PLEC	Plectin	3	1.4	5	2.4	2	0.4	5	2	4	2	4	1	5	2	5	2.4	4	1.8	37	9
Q9NYT0	PLEK2	Pleckstrin-2	0	0	0	0	0	0	0	0	0	0	0	0	0	0	0	0	1	0.2	1	1
Q9H8W4	PLEKHF2	Pleckstrin homology domain-containing family F member 2	0	0	0	0	0	0	0	0	0	0	0	0	1	0.2	0	0	0	0	1	1
Q8IVE3	PLEKHH2	Pleckstrin homology domain-containing family H member 2	0	0	0	0	0	0	0	0	0	0	0	0	1	0.2	0	0	0	0	1	1
P53350	PLK1	Serine/threonine-protein kinase PLK1	0	0	0	0	0	0	0	0	0	0	0	0	0	0	0	0	1	0.2	1	1
O00469	PLOD2	Procollagen-lysine,2-oxoglutarate 5-dioxygenase 2	0	0	0	0	0	0	0	0	0	0	0	0	1	0.4	0	0	0	0	1	1
Q04941	PLP2	Proteolipid protein 2	2	0.8	4	1.2	1	0.2	2	0.4	2	0.6	1	0.4	1	0.4	2	0.6	5	1	20	9
A0A5F9ZI76	PLPPR5	Phospholipid phosphatase-related protein type 5	0	0	0	0	0	0	1	0.2	0	0	0	0	0	0	1	0.2	0	0	2	2
P13797	PLS3	Plastin-3	3	1	4	3	3	0.8	3	2.2	4	1.6	5	2.6	4	3.2	4	3.2	4	1.8	34	9
P51805	PLXNA3	Plexin-A3	0	0	1	0.2	0	0	0	0	0	0	0	0	0	0	0	0	0	0	1	1
Q9ULL4	PLXNB3	Plexin-B3	0	0	0	0	1	0.2	1	0.2	0	0	0	0	0	0	0	0	0	0	2	2
P29590	PML	Protein PML	0	0	0	0	0	0	0	0	0	0	1	0.2	0	0	1	0.2	0	0	2	2
P02689	PMP2	Myelin P2 protein	0	0	0	0	0	0	0	0	0	0	0	0	0	0	0	0	4	2	4	1
Q10713	PMPCA	Mitochondrial-processing peptidase subunit alpha	1	0.2	1	0.2	1	0.2	0	0	1	0.2	0	0	1	0.2	3	0.6	2	0.6	10	7
P54278	PMS2	Mismatch repair endonuclease PMS2	0	0	1	0.2	0	0	0	0	0	0	0	0	0	0	0	0	0	0	1	1
Q8NA58	PNLDC1	Poly(A)-specific ribonuclease PNLDC1	0	0	0	0	0	0	0	0	0	0	0	0	1	0.2	0	0	0	0	1	1
Q9UL41	PNMA3	Paraneoplastic antigen Ma3	0	0	1	0.2	0	0	0	0	0	0	0	0	0	0	0	0	0	0	1	1
Q96PV4	PNMA5	Paraneoplastic antigen-like protein 5	0	0	0	0	0	0	0	0	1	0.2	0	0	0	0	0	0	0	0	1	1
P00491	PNP	Purine nucleoside phosphorylase	0	0	0	0	2	0.4	1	0.4	2	0.8	3	0.8	1	0.4	2	1.2	2	0.6	13	7
Q8IY17	PNPLA6	Patatin-like phospholipase domain-containing protein 6	0	0	0	0	0	0	0	0	0	0	0	0	0	0	1	0.2	0	0	1	1
Q12796	PNRC1	Proline-rich nuclear receptor coactivator 1	0	0	0	0	0	0	0	0	0	0	0	0	1	0.2	0	0	0	0	1	1
A6NMQ1	POLA1	DNA polymerase	0	0	0	0	0	0	0	0	0	0	0	0	0	0	0	0	1	0.2	1	1
Q07864	POLE	DNA polymerase epsilon catalytic subunit A	0	0	0	0	0	0	0	0	1	0.2	0	0	0	0	0	0	3	0.6	4	2
A0A590UJN4	POLR2A	DNA-directed RNA polymerase subunit	0	0	0	0	0	0	0	0	0	0	0	0	1	0.2	0	0	0	0	1	1
O14802	POLR3A	DNA-directed RNA polymerase III subunit RPC1	0	0	0	0	0	0	0	0	0	0	0	0	1	0.2	0	0	0	0	1	1
Q9NW08	POLR3B	DNA-directed RNA polymerase III subunit RPC2	1	0.2	0	0	0	0	0	0	0	0	0	0	0	0	0	0	0	0	1	1
O00411	POLRMT	DNA-directed RNA polymerase, mitochondrial	0	0	0	0	0	0	0	0	0	0	0	0	1	0.2	0	0	0	0	1	1
Q3SYA9	POM121L1P	Putative POM121-like protein 1	0	0	0	0	0	0	1	0.2	0	0	0	0	0	0	0	0	0	0	1	1
Q6S8J3	POTEE	POTE ankyrin domain family member E	5	53.8	5	57.4	5	63.6	5	47	5	56.6	5	55.4	5	49.4	5	50.6	5	52.6	45	9
H0YKT2	POU2F2	POU domain protein (Fragment)	0	0	1	0.2	0	0	0	0	0	0	0	0	0	0	0	0	0	0	1	1
Q96CD2	PPCDC	Phosphopantothenoylcysteine decarboxylase	1	0.2	0	0	0	0	0	0	0	0	0	0	0	0	0	0	0	0	1	1
B1APN9	PPFIA4	Liprin-alpha-4	1	0.2	0	0	0	0	0	0	0	0	0	0	0	0	0	0	0	0	1	1
P62937	PPIA	Peptidyl-prolyl cis-trans isomerase A	4	2.6	5	7.2	5	4.6	4	6.4	5	6	5	5.8	5	3.6	5	4.4	5	3.8	43	9
P23284	PPIB	Peptidyl-prolyl cis-trans isomerase B	4	2.6	3	2.6	5	4.8	4	2.2	4	2	5	4	5	4	5	5	3	3.2	38	9
Q6PFW1	PPIP5K1	Inositol hexakisphosphate and diphosphoinositol-pentakisphosphate kinase 1	0	0	0	0	0	0	0	0	0	0	0	0	0	0	1	0.2	0	0	1	1
Q8WY54	PPM1E	Protein phosphatase 1E	0	0	0	0	0	0	1	0.2	0	0	1	0.2	1	0.4	2	0.4	1	0.2	6	5
P49593	PPM1F	Protein phosphatase 1F	0	0	4	1.4	2	0.6	2	0.6	2	1.4	2	0.4	2	1	4	1.2	3	0.8	21	8
U3KQV3	PPM1J	PPM-type phosphatase domain-containing protein (Fragment)	4	2.8	2	0.8	3	2	2	1.8	2	0.8	4	1.6	2	1.6	3	1.2	3	1.6	25	9
Q5SGD2	PPM1L	Protein phosphatase 1L	0	0	0	0	0	0	1	0.2	0	0	0	0	0	0	0	0	0	0	1	1
F8W0W8	PPP1CC	Serine/threonine-protein phosphatase	0	0	2	0.8	0	0	0	0	0	0	1	0.4	1	0.4	0	0	0	0	4	3
O14974	PPP1R12A	Protein phosphatase 1 regulatory subunit 12A	0	0	2	0.4	0	0	0	0	0	0	0	0	0	0	0	0	0	0	2	1
Q96I34	PPP1R16A	Protein phosphatase 1 regulatory subunit 16A	0	0	1	0.2	0	0	0	0	0	0	0	0	0	0	0	0	0	0	1	1
Q5T8A7	PPP1R26	Protein phosphatase 1 regulatory subunit 26	0	0	0	0	2	0.6	0	0	1	0.2	0	0	0	0	0	0	0	0	3	2
Q9UQK1	PPP1R3C	Protein phosphatase 1 regulatory subunit 3C	0	0	1	0.2	0	0	0	0	0	0	0	0	0	0	0	0	1	0.2	2	2
P30153	PPP2R1A	Serine/threonine-protein phosphatase 2A 65 kDa regulatory subunit A alpha isoform	3	1.2	2	1.6	3	2.8	4	3.6	4	2.8	3	1.6	4	2.2	5	3.6	3	2.4	31	9
Q66LE6	PPP2R2D	Serine/threonine-protein phosphatase 2A 55 kDa regulatory subunit B delta isoform	0	0	0	0	0	0	0	0	0	0	0	0	1	0.2	0	0	1	0.2	2	2
Q08209	PPP3CA	Serine/threonine-protein phosphatase 2B catalytic subunit alpha isoform	1	0.2	0	0	0	0	0	0	0	0	0	0	0	0	0	0	0	0	1	1
Q9NY27	PPP4R2	Serine/threonine-protein phosphatase 4 regulatory subunit 2	0	0	0	0	0	0	0	0	0	0	1	0.2	0	0	0	0	0	0	1	1
Q5MIZ7	PPP4R3B	Serine/threonine-protein phosphatase 4 regulatory subunit 3B	0	0	0	0	0	0	0	0	0	0	1	0.2	0	0	0	0	0	0	1	1
O75170	PPP6R2	Serine/threonine-protein phosphatase 6 regulatory subunit 2	0	0	1	0.2	0	0	0	0	0	0	0	0	0	0	0	0	0	0	1	1
Q5VV67	PPRC1	Peroxisome proliferator-activated receptor gamma coactivator-related protein 1	0	0	0	0	0	0	0	0	1	0.2	0	0	0	0	0	0	0	0	1	1
A0A286YFF7	PPT1	Palmitoyl-protein thioesterase 1	0	0	2	0.8	0	0	0	0	0	0	0	0	0	0	1	0.4	0	0	3	2
O95522	PRAMEF12	PRAME family member 12	1	0.2	0	0	0	0	0	0	0	0	0	0	0	0	0	0	0	0	1	1
A0A0G2JMD5	PRAMEF33	PRAME family member 33	0	0	0	0	0	0	1	0.2	0	0	0	0	0	0	0	0	0	0	1	1
Q5VWM4	PRAMEF8	PRAME family member 8	0	0	0	0	0	0	0	0	0	0	0	0	1	0.2	0	0	0	0	1	1
P57071	PRDM15	PR domain zinc finger protein 15	0	0	0	0	0	0	0	0	0	0	0	0	0	0	1	0.2	0	0	1	1
Q9NQV7	PRDM9	Histone-lysine N-methyltransferase PRDM9	0	0	0	0	1	0.2	0	0	0	0	0	0	0	0	0	0	1	0.2	2	2
Q06830	PRDX1	Peroxiredoxin-1	5	7.6	5	7.8	5	11.8	5	14	5	9.6	5	9	5	9.6	5	9.2	5	11.6	45	9
P32119	PRDX2	Peroxiredoxin-2	4	1	4	1.2	5	1.6	3	0.6	5	2	2	0.6	4	1.4	4	1	5	1.8	36	9
Q13162	PRDX4	Peroxiredoxin-4	3	0.6	0	0	4	0.8	2	0.4	2	0.4	0	0	4	0.8	4	0.8	1	0.4	20	7
P30044	PRDX5	Peroxiredoxin-5, mitochondrial	0	0	0	0	0	0	0	0	0	0	0	0	0	0	0	0	1	0.4	1	1
P30041	PRDX6	Peroxiredoxin-6	1	0.4	3	1	3	1.4	1	0.4	2	0.8	4	2	2	0.8	1	0.2	1	0.4	18	9
A0A087WXX9	PRKAA2	Non-specific serine/threonine protein kinase	0	0	0	0	0	0	0	0	0	0	1	0.2	0	0	0	0	1	0.2	2	2
B4DUK8	PRKAG3	5'-AMP-activated protein kinase subunit gamma-3	0	0	0	0	0	0	0	0	0	0	1	0.2	0	0	0	0	0	0	1	1
P24723	PRKCH	Protein kinase C eta type	0	0	0	0	0	0	0	0	1	0.2	0	0	0	0	0	0	1	0.2	2	2
Q04759	PRKCQ	Protein kinase C theta type	0	0	0	0	0	0	0	0	0	0	0	0	0	0	1	0.2	1	0.2	2	2
K7ELL7	PRKCSH	Glucosidase 2 subunit beta	3	0.8	1	0.4	4	2	2	0.4	3	1.2	5	2	5	1.8	1	0.4	4	1.6	28	9
P78527	PRKDC	DNA-dependent protein kinase catalytic subunit	0	0	2	0.8	1	0.4	3	1.4	2	1.8	2	0.4	1	0.8	1	0.4	1	0.4	13	8
Q99873	PRMT1	Protein arginine N-methyltransferase 1	1	0.2	0	0	0	0	0	0	0	0	0	0	0	0	0	0	1	0.4	2	2
Q9HC23	PROK2	Prokineticin-2	0	0	0	0	0	0	0	0	0	0	0	0	1	0.2	0	0	0	0	1	1
O43490	PROM1	Prominin-1	0	0	0	0	0	0	0	0	0	0	0	0	0	0	1	0.2	0	0	1	1
Q8N271	PROM2	Prominin-2	0	0	0	0	0	0	0	0	0	0	1	0.2	0	0	0	0	0	0	1	1
Q99633	PRPF18	Pre-mRNA-splicing factor 18	1	0.2	0	0	0	0	0	0	0	0	0	0	0	0	0	0	0	0	1	1
Q5VTL8	PRPF38B	Pre-mRNA-splicing factor 38B	0	0	0	0	0	0	0	0	1	0.2	0	0	0	0	0	0	0	0	1	1
O60256	PRPSAP2	Phosphoribosyl pyrophosphate synthase-associated protein 2	0	0	0	0	0	0	0	0	0	0	0	0	0	0	0	0	1	0.2	1	1
A0A1W2PPC1	PRR33	Proline-rich protein 33	0	0	0	0	0	0	0	0	0	0	1	0.2	0	0	0	0	0	0	1	1
P48634	PRRC2A	Protein PRRC2A	0	0	0	0	0	0	0	0	0	0	0	0	0	0	0	0	1	0.4	1	1
H7C4Q3	PRRT4	Proline-rich transmembrane protein 4 (Fragment)	0	0	0	0	1	0.2	0	0	0	0	0	0	0	0	0	0	0	0	1	1
P56730	PRSS12	Neurotrypsin	0	0	0	0	0	0	0	0	0	0	0	0	0	0	1	0.2	0	0	1	1
Q9BRX8	PRXL2A	Peroxiredoxin-like 2A	5	5.6	3	2	4	2.4	4	2.8	5	3.2	5	4	5	4	4	2.8	3	1.6	38	9
A0A0A0MT35	PRXL2B	Prostamide/prostaglandin F synthase	0	0	0	0	0	0	0	0	0	0	0	0	1	0.2	0	0	0	0	1	1
C9JIZ6	PSAP	Prosaposin	1	0.4	0	0	2	0.8	0	0	0	0	2	0.8	0	0	1	0.4	0	0	6	4
Q6NUJ1	PSAPL1	Proactivator polypeptide-like 1	0	0	0	0	1	0.2	0	0	0	0	0	0	0	0	0	0	0	0	1	1
O75475	PSIP1	PC4 and SFRS1-interacting protein	2	0.4	1	0.2	0	0	0	0	0	0	2	0.4	0	0	0	0	1	0.2	6	4
P25786	PSMA1	Proteasome subunit alpha type-1	5	3.6	5	2.8	5	4	5	2.8	5	2.8	5	4	5	2.8	5	2.8	5	3.6	45	9
P25787	PSMA2	Proteasome subunit alpha type-2	1	0.4	0	0	0	0	1	0.4	1	0.2	3	1.2	2	0.6	3	2	0	0	11	6
P28066	PSMA5	Proteasome subunit alpha type-5	3	1	3	1.8	2	0.8	4	1.2	1	0.2	2	1	1	0.2	1	0.4	3	1.8	20	9
G3V5Z7	PSMA6	Proteasome subunit alpha type	0	0	0	0	1	0.2	0	0	0	0	1	0.4	0	0	0	0	0	0	2	2
Q8TAA3	PSMA8	Proteasome subunit alpha-type 8	0	0	0	0	0	0	0	0	2	0.8	0	0	0	0	3	0.6	2	0.4	7	3
P49721	PSMB2	Proteasome subunit beta type-2	0	0	0	0	0	0	1	0.2	0	0	0	0	0	0	0	0	2	0.4	3	2
P28074	PSMB5	Proteasome subunit beta type-5	1	0.2	1	0.2	1	0.2	1	0.2	0	0	0	0	0	0	1	0.2	1	0.4	6	6
P28072	PSMB6	Proteasome subunit beta type-6	0	0	0	0	2	0.4	0	0	1	0.2	1	0.2	0	0	0	0	0	0	4	3
Q99436	PSMB7	Proteasome subunit beta type-7	1	0.4	0	0	3	1.4	1	0.2	3	1	2	0.8	1	0.4	2	0.8	1	0.4	14	8
P35998	PSMC2	26S proteasome regulatory subunit 7	0	0	0	0	0	0	0	0	0	0	1	0.2	0	0	0	0	0	0	1	1
P17980	PSMC3	26S proteasome regulatory subunit 6A	1	0.2	0	0	0	0	0	0	0	0	0	0	0	0	0	0	0	0	1	1
P43686	PSMC4	26S proteasome regulatory subunit 6B	5	6.4	5	4.4	4	2.2	3	2	2	0.8	2	0.8	5	2.4	0	0	4	1.4	30	8
P62195	PSMC5	26S proteasome regulatory subunit 8	1	0.4	1	0.2	1	0.2	0	0	0	0	0	0	0	0	0	0	0	0	3	3
A0A087WW66	PSMD1	26S proteasome non-ATPase regulatory subunit 1	3	1.2	1	0.4	0	0	0	0	0	0	0	0	0	0	0	0	0	0	4	2
O00231	PSMD11	26S proteasome non-ATPase regulatory subunit 11	0	0	1	0.2	0	0	0	0	0	0	0	0	0	0	0	0	0	0	1	1
O00232	PSMD12	26S proteasome non-ATPase regulatory subunit 12	0	0	0	0	0	0	0	0	0	0	0	0	0	0	2	0.6	0	0	2	1
J3KNQ3	PSMD13	26S proteasome non-ATPase regulatory subunit 13	0	0	0	0	0	0	0	0	0	0	0	0	1	0.2	0	0	0	0	1	1
O00487	PSMD14	26S proteasome non-ATPase regulatory subunit 14	1	0.2	0	0	2	0.4	1	0.2	1	0.2	2	0.4	1	0.2	0	0	0	0	8	6
Q13200	PSMD2	26S proteasome non-ATPase regulatory subunit 2	0	0	2	0.4	0	0	2	0.4	1	0.2	2	0.4	2	0.4	1	0.2	1	0.2	11	7
O43242	PSMD3	26S proteasome non-ATPase regulatory subunit 3	0	0	1	0.2	0	0	1	0.2	0	0	0	0	1	0.2	0	0	0	0	3	3
Q06323	PSME1	Proteasome activator complex subunit 1	0	0	1	0.4	0	0	0	0	0	0	1	0.4	0	0	0	0	1	0.4	3	3
A0A087X1Z3	PSME2	Proteasome activator complex subunit 2	0	0	0	0	1	0.2	0	0	0	0	1	0.4	0	0	0	0	0	0	2	2
O43586	PSTPIP1	Proline-serine-threonine phosphatase-interacting protein 1	0	0	0	0	0	0	0	0	1	0.2	0	0	0	0	0	0	0	0	1	1
A0A0U1RRM4	PTBP1	Polypyrimidine tract-binding protein 1	5	6	5	5.4	5	6	5	6.4	5	5	5	6.2	5	5	5	6	5	4.2	45	9
Q9Y5Y4	PTGDR2	Prostaglandin D2 receptor 2	0	0	0	0	0	0	0	0	0	0	0	0	0	0	2	0.4	0	0	2	1
A0A087WYT3	PTGES3	Prostaglandin E synthase 3	4	2.8	5	3.6	4	2.8	4	3.2	4	2.8	4	2.4	5	2.8	5	4	4	2.8	39	9
Q14914	PTGR1	Prostaglandin reductase 1	0	0	0	0	0	0	0	0	0	0	0	0	0	0	1	0.4	1	0.4	2	2
P23219	PTGS1	Prostaglandin G/H synthase 1	1	0.2	0	0	0	0	0	0	0	0	0	0	0	0	1	0.2	0	0	2	2
H7C2N1	PTMA	Prothymosin alpha (Fragment)	5	8	5	8.4	5	7.6	5	8.6	5	7.8	5	5.6	5	8	5	6	5	7.4	45	9
P20962	PTMS	Parathymosin	1	0.2	3	1	1	0.2	1	0.4	1	0.2	0	0	2	0.6	2	0.6	2	0.4	13	8
Q9H3S7	PTPN23	Tyrosine-protein phosphatase non-receptor type 23	0	0	0	0	0	0	1	0.2	0	0	0	0	0	0	0	0	0	0	1	1
F8VU56	PTPRB	Receptor-type tyrosine-protein phosphatase beta	1	0.2	0	0	0	0	0	0	0	0	0	0	0	0	0	0	0	0	1	1
P23468	PTPRD	Receptor-type tyrosine-protein phosphatase delta	0	0	0	0	0	0	0	0	1	0.2	0	0	0	0	0	0	0	0	1	1
Q13332	PTPRS	Receptor-type tyrosine-protein phosphatase S	0	0	0	0	0	0	1	0.2	0	0	0	0	0	0	0	0	0	0	1	1
A0A0B4J2E5	PWP2	Uncharacterized protein	0	0	0	0	0	0	0	0	1	0.2	0	0	0	0	0	0	0	0	1	1
P11216	PYGB	Glycogen phosphorylase, brain form	0	0	0	0	0	0	1	0.2	0	0	0	0	0	0	0	0	0	0	1	1
Q9BRQ0	PYGO2	Pygopus homolog 2	0	0	0	0	0	0	0	0	0	0	1	0.2	0	0	0	0	0	0	1	1
Q96PU8	QKI	Protein quaking	0	0	0	0	1	0.2	0	0	0	0	0	0	0	0	0	0	0	0	1	1
P61026	RAB10	Ras-related protein Rab-10	0	0	2	0.4	2	1	0	0	3	0.6	0	0	1	0.6	1	0.2	0	0	9	5
P62820	RAB1A	Ras-related protein Rab-1A	0	0	2	0.4	2	1	0	0	3	0.6	0	0	1	0.6	1	0.2	0	0	9	5
Q9H0U4	RAB1B	Ras-related protein Rab-1B	0	0	2	0.8	0	0	2	0.6	1	0.4	0	0	2	0.4	1	0.4	0	0	8	5
Q92928	RAB1C	Putative Ras-related protein Rab-1C	0	0	2	0.4	2	1	0	0	3	0.6	0	0	1	0.6	1	0.2	0	0	9	5
H3BQ97	RAB26	Ras-related protein Rab-26 (Fragment)	0	0	0	0	1	0.2	0	0	0	0	0	0	0	0	0	0	0	0	1	1
E9PK89	RAB3IL1	Guanine nucleotide exchange factor for Rab-3A	0	0	0	0	0	0	0	0	1	0.2	0	0	0	0	0	0	0	0	1	1
P51148	RAB5C	Ras-related protein Rab-5C	1	0.4	2	0.8	0	0	2	0.8	1	0.4	0	0	1	0.4	0	0	0	0	7	5
P51149	RAB7A	Ras-related protein Rab-7a	0	0	0	0	0	0	0	0	1	0.4	0	0	0	0	0	0	0	0	1	1
Q92930	RAB8B	Ras-related protein Rab-8B	0	0	2	0.8	0	0	1	0.2	1	0.6	0	0	2	0.4	1	0.4	0	0	7	5
P63000	RAC1	Ras-related C3 botulinum toxin substrate 1	0	0	0	0	0	0	0	0	0	0	0	0	1	0.2	2	0.4	1	0.2	4	3
P15153	RAC2	Ras-related C3 botulinum toxin substrate 2	0	0	0	0	0	0	1	0.2	0	0	0	0	1	0.4	0	0	2	0.4	4	3
P63244	RACK1	Receptor of activated protein C kinase 1	4	2.4	4	1.8	4	4	4	3.4	5	3.2	5	4.2	4	4.2	5	1.6	5	3.8	40	9
Q9NS91	RAD18	E3 ubiquitin-protein ligase RAD18	1	0.2	0	0	0	0	0	0	0	0	0	0	0	0	0	0	0	0	1	1
Q9H4I0	RAD21L1	Double-strand-break repair protein rad21-like protein 1	0	0	0	0	0	0	0	0	0	0	0	0	0	0	1	0.2	0	0	1	1
O43502	RAD51C	DNA repair protein RAD51 homolog 3	0	0	1	0.2	0	0	0	0	2	0.8	0	0	1	0.2	0	0	1	0.4	5	4
Q96JH8	RADIL	Ras-associating and dilute domain-containing protein	0	0	0	0	0	0	0	0	1	0.2	0	0	0	0	0	0	0	0	1	1
Q6NSI4	RADX	RPA-related protein RADX	1	0.4	1	0.8	0	0	1	0.2	0	0	0	0	1	0.2	2	0.6	4	1	10	6
P11233	RALA	Ras-related protein Ral-A	4	1.4	4	1.4	4	1.8	5	1.8	4	1.2	3	1	4	1.6	4	1.2	4	1.4	36	9
P11234	RALB	Ras-related protein Ral-B	0	0	1	0.4	1	0.2	0	0	0	0	0	0	1	0.4	0	0	1	0.4	4	4
A0A1B0GUI1	RALGAPA1	Ral GTPase-activating protein subunit alpha-1	0	0	0	0	0	0	0	0	0	0	1	0.2	0	0	0	0	0	0	1	1
Q2PPJ7	RALGAPA2	Ral GTPase-activating protein subunit alpha-2	0	0	0	0	0	0	0	0	0	0	0	0	1	0.2	0	0	0	0	1	1
Q9UKM9	RALY	RNA-binding protein Raly	0	0	0	0	0	0	1	0.2	1	0.2	0	0	0	0	1	0.2	0	0	3	3
Q86SE5	RALYL	RNA-binding Raly-like protein	0	0	0	0	0	0	0	0	1	0.2	0	0	0	0	0	0	0	0	1	1
J3KQE5	RAN	GTP-binding nuclear protein Ran (Fragment)	4	4.6	5	4.8	5	5	5	5.6	5	5.4	5	5.2	5	2.6	5	5	5	3.2	44	9
A6NIZ1	RAP1B	Ras-related protein Rap-1b-like protein	2	0.4	0	0	0	0	0	0	1	0.2	2	0.4	0	0	0	0	1	0.2	6	4
X6R8W7	RAP1GAP	Rap1 GTPase-activating protein 1	1	0.2	0	0	0	0	0	0	0	0	0	0	0	0	0	0	0	0	1	1
P52306	RAP1GDS1	Rap1 GTPase-GDP dissociation stimulator 1	0	0	0	0	0	0	1	0.2	0	0	0	0	0	0	0	0	0	0	1	1
F6U784	RAP2A	Ras-related protein Rap-2a	0	0	0	0	2	0.4	1	0.2	2	0.4	1	0.4	3	0.6	0	0	0	0	9	5
Q8WZA2	RAPGEF4	Rap guanine nucleotide exchange factor 4	0	0	0	0	1	0.2	0	0	0	0	0	0	0	0	0	0	0	0	1	1
E9PGY3	RAPGEF5	Rap guanine nucleotide exchange factor 5	0	0	0	0	0	0	0	0	0	0	0	0	0	0	0	0	1	0.2	1	1
P54136	RARS1	Arginine--tRNA ligase, cytoplasmic	1	0.4	1	0.2	4	1.6	1	0.4	2	0.6	0	0	3	1	1	0.8	3	1.2	16	8
Q13972	RASGRF1	Ras-specific guanine nucleotide-releasing factor 1	1	0.2	0	0	0	0	0	0	0	0	0	0	0	0	0	0	0	0	1	1
H0YNK9	RASGRP1	RAS guanyl-releasing protein 1 (Fragment)	0	0	0	0	0	0	1	0.2	0	0	0	0	0	0	0	0	0	0	1	1
Q8WWW0	RASSF5	Ras association domain-containing protein 5	0	0	1	0.2	0	0	0	0	0	0	0	0	0	0	0	0	0	0	1	1
Q09028	RBBP4	Histone-binding protein RBBP4	0	0	0	0	0	0	1	0.2	0	0	0	0	0	0	0	0	0	0	1	1
Q16576	RBBP7	Histone-binding protein RBBP7	0	0	1	0.2	0	0	0	0	1	0.2	0	0	1	0.2	0	0	0	0	3	3
Q96PK6	RBM14	RNA-binding protein 14	0	0	1	0.4	0	0	0	0	0	0	0	0	0	0	1	0.2	0	0	2	2
Q96T37	RBM15	RNA-binding protein 15	0	0	1	0.2	0	0	1	0.2	0	0	0	0	0	0	0	0	0	0	2	2
P98179	RBM3	RNA-binding protein 3	0	0	1	0.4	1	0.2	3	0.6	1	0.2	0	0	2	0.8	2	0.8	5	2	15	7
Q14498	RBM39	RNA-binding protein 39	0	0	1	0.2	0	0	0	0	0	0	0	0	0	0	0	0	0	0	1	1
A0AV96	RBM47	RNA-binding protein 47	0	0	0	0	0	0	0	0	0	0	1	0.4	0	0	0	0	0	0	1	1
P38159	RBMX	RNA-binding motif protein, X chromosome	2	0.4	2	0.4	2	0.4	3	0.8	5	1.8	5	1.8	5	1.6	5	1.2	5	1.8	34	9
Q9Y2P8	RCL1	RNA 3'-terminal phosphate cyclase-like protein	0	0	0	0	0	0	0	0	0	0	0	0	0	0	1	0.2	0	0	1	1
Q15293	RCN1	Reticulocalbin-1	3	1.8	1	0.2	2	2.2	4	2.8	4	1.8	4	3.4	4	2.4	4	2.2	5	4.2	31	9
K7ELF7	RDH8	Retinol dehydrogenase	0	0	0	0	0	0	0	0	0	0	0	0	1	0.2	0	0	0	0	1	1
A0A2R8Y5S7	RDX	Radixin	5	4	5	4	5	3.4	5	3.8	5	2.8	5	3.8	5	2.8	5	2.8	5	3.8	45	9
H7BZ24	REG1B	Lithostathine-1-beta (Fragment)	0	0	0	0	0	0	0	0	1	0.2	0	0	0	0	0	0	1	0.2	2	2
P0DTD1	rep	Replicase polyprotein 1ab	1	0.2	0	0	0	0	0	0	0	0	0	0	0	0	1	0.2	0	0	2	2
Q8NFH8	REPS2	RalBP1-associated Eps domain-containing protein 2	0	0	1	0.2	0	0	0	0	0	0	0	0	0	0	0	0	0	0	1	1
Q86VR2	RETREG3	Reticulophagy regulator 3	0	0	0	0	0	0	1	0.2	0	0	0	0	0	0	0	0	0	0	1	1
P35249	RFC4	Replication factor C subunit 4	0	0	0	0	0	0	0	0	0	0	0	0	0	0	0	0	1	0.4	1	1
Q8WZ73	RFFL	E3 ubiquitin-protein ligase rififylin	0	0	1	0.2	0	0	0	0	2	0.4	0	0	0	0	0	0	0	0	3	2
H0YGQ6	RFXANK	DNA-binding protein RFXANK (Fragment)	0	0	0	0	0	0	0	0	0	0	0	0	0	0	1	0.2	0	0	1	1
G3V3Z3	RGMA	Repulsive guidance molecule A	1	0.2	0	0	0	0	0	0	0	0	0	0	0	0	0	0	0	0	1	1
O43566	RGS14	Regulator of G-protein signaling 14	0	0	0	0	1	0.2	0	0	1	0.2	0	0	1	0.2	0	0	0	0	3	3
A0A0U1RRF6	RGSL1	Regulator of G-protein-signaling protein-like (Fragment)	0	0	0	0	0	0	0	0	0	0	1	0.2	0	0	0	0	0	0	1	1
A0A2R8YEH1	RHAG	Ammonium transporter Rh type A	0	0	0	0	1	0.2	0	0	0	0	0	0	0	0	0	0	0	0	1	1
P08100	RHO	Rhodopsin	1	0.2	0	0	0	0	0	0	0	0	0	0	0	0	0	0	0	0	1	1
P61586	RHOA	Transforming protein RhoA	1	0.4	0	0	0	0	1	0.4	1	0.4	2	0.6	1	0.4	0	0	2	0.8	8	6
Q5UIP0	RIF1	Telomere-associated protein RIF1	0	0	0	0	0	0	0	0	0	0	0	0	0	0	1	0.2	0	0	1	1
A0A2R8Y6Z0	RIMBP2	RIMS-binding protein 2	0	0	1	0.2	0	0	0	0	0	0	0	0	1	0.2	0	0	0	0	2	2
Q9H426	RIMS4	Regulating synaptic membrane exocytosis protein 4	1	0.2	0	0	5	1	0	0	1	0.2	0	0	1	0.2	0	0	2	0.4	10	5
Q9H6W3	RIOX1	Ribosomal oxygenase 1	0	0	0	0	1	0.2	0	0	0	0	0	0	0	0	0	0	0	0	1	1
Q8IUF8	RIOX2	Ribosomal oxygenase 2	0	0	0	0	1	0.2	0	0	0	0	0	0	0	0	0	0	0	0	1	1
H3BSX9	RIPOR1	Rho family-interacting cell polarization regulator 1 (Fragment)	0	0	1	0.2	0	0	0	0	0	0	0	0	0	0	0	0	0	0	1	1
P04090	RLN2	Prorelaxin H2	0	0	1	0.2	0	0	0	0	0	0	0	0	0	0	0	0	0	0	1	1
P12724	RNASE3	Eosinophil cationic protein	0	0	0	0	0	0	0	0	0	0	0	0	0	0	1	0.2	0	0	1	1
O15541	RNF113A	E3 ubiquitin-protein ligase RNF113A	0	0	1	0.2	0	0	0	0	0	0	0	0	0	0	0	0	0	0	1	1
Q9Y6U7	RNF215	RING finger protein 215	0	0	0	0	1	0.2	0	0	0	0	0	0	0	0	0	0	0	0	1	1
O75150	RNF40	E3 ubiquitin-protein ligase BRE1B	0	0	0	0	1	0.2	0	0	0	0	0	0	0	0	0	0	0	0	1	1
Q68DV7	RNF43	E3 ubiquitin-protein ligase RNF43	0	0	0	0	1	0.2	0	0	0	0	0	0	0	0	0	0	0	0	1	1
Q5M7Z0	RNFT1	E3 ubiquitin-protein ligase RNFT1	0	0	0	0	0	0	0	0	1	0.2	0	0	0	0	0	0	0	0	1	1
P13489	RNH1	Ribonuclease inhibitor	4	1.6	5	1	5	2.4	5	1.6	5	1.8	5	1.6	5	1.4	4	1.2	5	1.6	43	9
H3BMS0	RNPS1	RNA-binding protein with serine-rich domain 1	0	0	0	0	0	0	0	0	0	0	1	0.2	0	0	1	0.4	0	0	2	2
P60602	ROMO1	Reactive oxygen species modulator 1	0	0	1	0.2	0	0	0	0	0	0	0	0	0	0	0	0	0	0	1	1
P08922	ROS1	Proto-oncogene tyrosine-protein kinase ROS	0	0	0	0	0	0	0	0	0	0	0	0	0	0	0	0	1	0.2	1	1
P56715	RP1	Oxygen-regulated protein 1	1	0.2	0	0	0	0	1	0.2	0	0	0	0	1	0.2	3	0.6	0	0	6	4
P27635	RPL10	60S ribosomal protein L10	5	3.4	5	3.6	5	3	5	3	5	3.8	3	1.6	5	4.2	5	5.2	5	3	43	9
P62906	RPL10A	60S ribosomal protein L10a	3	1.6	4	2	4	2.4	1	0.8	2	1.2	4	1.6	3	1.2	5	3	4	2.2	30	9
P62913	RPL11	60S ribosomal protein L11	0	0	0	0	1	0.4	0	0	0	0	0	0	0	0	0	0	1	0.4	2	2
P30050	RPL12	60S ribosomal protein L12	4	1.6	4	1.2	4	1.2	4	1.4	2	0.8	3	0.6	3	1.2	3	0.8	3	1	30	9
P26373	RPL13	60S ribosomal protein L13	5	1.8	5	2	5	2	5	1.8	5	1.8	5	1.8	5	2.2	5	2	5	2	45	9
M0QYS1	RPL13A	60S ribosomal protein L13a (Fragment)	2	1.2	4	2	1	0.4	2	0.8	1	0.4	2	1.2	2	0.8	0	0	2	1.2	16	8
P50914	RPL14	60S ribosomal protein L14	4	1.2	5	1.8	3	1.2	4	1.6	1	0.4	4	1.2	3	0.6	2	0.6	4	1.4	30	9
P61313	RPL15	60S ribosomal protein L15	1	0.2	0	0	0	0	0	0	0	0	0	0	0	0	0	0	0	0	1	1
A0A0A6YYL6	RPL17-C18orf32	Protein RPL17-C18orf32	0	0	0	0	0	0	1	0.2	0	0	0	0	0	0	0	0	0	0	1	1
J3QQ67	RPL18	60S ribosomal protein L18 (Fragment)	0	0	2	0.4	2	0.6	3	0.6	1	0.2	0	0	0	0	1	0.2	2	0.8	11	6
P84098	RPL19	60S ribosomal protein L19	1	0.2	1	0.2	2	0.6	1	0.4	3	0.6	2	0.4	2	0.8	2	0.6	2	0.6	16	9
P46778	RPL21	60S ribosomal protein L21	5	1.8	5	2.2	5	2.6	5	2.8	4	1.4	5	1.6	5	3.2	5	1.8	4	1.8	43	9
P35268	RPL22	60S ribosomal protein L22	4	1.6	4	1	5	2.2	4	1.8	5	2.2	5	1.4	5	2.2	5	1.4	5	2.2	42	9
P62829	RPL23	60S ribosomal protein L23	1	0.2	0	0	1	0.2	0	0	0	0	1	0.2	0	0	0	0	0	0	3	3
A8MUS3	RPL23A	60S ribosomal protein L23a	3	2	2	1.2	1	0.4	2	1.2	0	0	2	1.2	1	0.8	1	0.4	0	0	12	7
P83731	RPL24	60S ribosomal protein L24	2	0.4	0	0	0	0	1	0.6	2	0.4	2	0.4	0	0	3	0.8	3	0.8	13	6
P61254	RPL26	60S ribosomal protein L26	1	0.2	0	0	0	0	0	0	0	0	0	0	1	0.2	0	0	0	0	2	2
P46776	RPL27A	60S ribosomal protein L27a	5	1.4	5	1.6	5	1.8	5	1.6	5	1.6	5	1.8	5	1.8	4	1.4	5	1.8	44	9
H0YKD8	RPL28	60S ribosomal protein L28	1	0.4	3	1.2	1	0.4	3	1.6	3	1.6	2	0.8	1	0.4	2	0.6	0	0	16	8
A0A3B3ITT5	RPL29	60S ribosomal protein L29	5	3.2	5	4.4	5	3.2	5	4	5	3.6	4	2.8	5	4	5	3.6	5	3.6	44	9
P39023	RPL3	60S ribosomal protein L3	5	3.8	5	2.4	5	6	5	5.8	5	2.6	5	6.8	5	4.2	5	5.2	5	7.2	45	9
P62888	RPL30	60S ribosomal protein L30	4	2.8	5	3.2	5	4	4	2.8	5	2.8	4	1.2	3	2.4	5	2.4	5	3.4	40	9
F8W727	RPL32	60S ribosomal protein L32	5	3.6	5	2.4	2	1.6	5	4	5	2.8	3	1.6	4	2.8	5	2.8	5	2.8	39	9
P42766	RPL35	60S ribosomal protein L35	4	1.2	2	0.4	2	0.4	4	1.4	4	0.8	1	0.2	3	0.6	3	0.6	5	1.2	28	9
P36578	RPL4	60S ribosomal protein L4	5	2.2	4	2	4	1.2	4	2	5	2.2	3	2.2	4	2.4	5	3	4	2.2	38	9
P46777	RPL5	60S ribosomal protein L5	2	0.8	1	0.4	3	2.4	3	1.6	2	0.6	3	1.4	0	0	1	0.4	4	2.8	19	8
Q02878	RPL6	60S ribosomal protein L6	0	0	2	0.6	2	0.6	1	0.8	1	0.4	1	0.4	1	0.4	0	0	2	1.2	10	7
P18124	RPL7	60S ribosomal protein L7	1	0.2	4	3	4	2.6	3	1.6	5	2.4	3	1.4	4	2.8	5	3.8	4	2	33	9
P62424	RPL7A	60S ribosomal protein L7a	3	0.8	5	1.6	4	1	4	1.4	2	0.6	5	1.6	5	1.2	3	0.6	3	1	34	9
P62917	RPL8	60S ribosomal protein L8	1	0.2	3	1	1	0.2	1	0.4	1	0.2	0	0	0	0	1	0.2	1	0.2	9	7
P32969	RPL9	60S ribosomal protein L9	5	6.8	5	4	1	0.4	4	1.6	3	1.4	4	2	4	2.4	1	0.4	2	1.2	29	9
P05388	RPLP0	60S acidic ribosomal protein P0	5	5.6	5	4.4	5	4.2	5	6.6	5	7	5	5.8	5	6	5	5.4	5	6.2	45	9
P05386	RPLP1	60S acidic ribosomal protein P1	1	0.4	0	0	0	0	0	0	0	0	0	0	0	0	1	0.2	2	0.8	4	3
P05387	RPLP2	60S acidic ribosomal protein P2	5	6.4	4	4	5	6.4	5	6.2	5	4.8	5	5	5	4	5	4.4	5	5.6	44	9
P04843	RPN1	Dolichyl-diphosphooligosaccharide--protein glycosyltransferase subunit 1	3	1.8	3	1.2	3	1.6	4	1.8	2	2	2	0.8	1	0.4	5	3	4	2.4	27	9
P04844	RPN2	Dolichyl-diphosphooligosaccharide--protein glycosyltransferase subunit 2	5	4.2	3	2	5	2.6	5	3.4	5	3.4	5	4.8	3	1.4	5	3.4	4	2.2	40	9
P62280	RPS11	40S ribosomal protein S11	1	0.2	2	0.4	4	1	1	0.2	5	1.2	0	0	3	0.8	3	1	2	0.6	21	8
P25398	RPS12	40S ribosomal protein S12	0	0	0	0	1	0.4	1	0.4	1	0.4	0	0	0	0	0	0	0	0	3	3
P62277	RPS13	40S ribosomal protein S13	3	0.6	2	0.4	1	0.2	1	0.2	3	0.6	2	0.6	3	0.6	3	0.6	3	0.6	21	9
P62263	RPS14	40S ribosomal protein S14	3	1.2	5	2	5	2	4	1.4	5	1.6	4	1.4	5	2.2	5	1.4	5	2.4	41	9
K7ELC2	RPS15	40S ribosomal protein S15	0	0	0	0	0	0	2	1.6	0	0	0	0	0	0	1	0.2	0	0	3	2
Q6IPX4	RPS16	40S ribosomal protein S16	4	2.2	1	0.4	3	1	3	2.2	2	1	5	2.6	3	1.6	2	0.6	4	1.2	27	9
P62269	RPS18	40S ribosomal protein S18	4	2.6	5	3.4	5	2.2	5	1.8	5	3.2	5	2	5	3.8	5	3	5	3.8	44	9
P39019	RPS19	40S ribosomal protein S19	2	0.4	1	0.4	2	0.8	2	0.4	2	0.4	1	0.2	2	0.4	4	0.8	3	0.6	19	9
P15880	RPS2	40S ribosomal protein S2	3	1.6	4	1.8	4	3.2	5	3.6	4	3.2	3	1.6	4	2.6	3	2	5	3.4	35	9
P60866	RPS20	40S ribosomal protein S20	4	1	3	0.6	5	1.4	5	1.4	4	1	3	0.6	2	0.4	4	1.2	2	0.6	32	9
P63220	RPS21	40S ribosomal protein S21	0	0	0	0	1	0.2	0	0	0	0	1	0.2	0	0	0	0	0	0	2	2
P62266	RPS23	40S ribosomal protein S23	5	2.8	3	2	3	1.6	5	3.2	4	2	5	2.8	3	2	2	0.8	5	3.2	35	9
A0A2R8YD14	RPS24	40S ribosomal protein S24	0	0	0	0	0	0	0	0	0	0	0	0	0	0	0	0	1	0.2	1	1
P62851	RPS25	40S ribosomal protein S25	4	1.2	3	0.6	4	1.2	3	1.2	5	1.6	2	0.6	5	1.2	4	1.4	3	1	33	9
P62854	RPS26	40S ribosomal protein S26	0	0	1	0.2	1	0.2	0	0	0	0	0	0	0	0	0	0	1	0.2	3	3
P62979	RPS27A	Ubiquitin-40S ribosomal protein S27a	0	0	0	0	0	0	0	0	0	0	1	0.4	0	0	0	0	0	0	1	1
H0YMV8	RPS27L	40S ribosomal protein S27	1	0.2	0	0	0	0	0	0	0	0	0	0	0	0	0	0	0	0	1	1
P62857	RPS28	40S ribosomal protein S28	3	1	5	1.2	5	1.2	2	0.8	3	0.6	3	0.8	4	1	4	1.2	3	1	32	9
P23396	RPS3	40S ribosomal protein S3	3	1.2	4	1.2	4	2.8	5	3.2	5	3.2	4	1.6	4	2.2	5	1.6	5	3	39	9
P61247	RPS3A	40S ribosomal protein S3a	1	0.2	0	0	0	0	1	0.2	0	0	0	0	1	0.2	0	0	0	0	3	3
P62701	RPS4X	40S ribosomal protein S4, X isoform	4	3.2	4	1.4	4	2.2	4	2	4	1.2	4	2.8	4	1.8	2	0.6	5	2.6	35	9
M0R0R2	RPS5	40S ribosomal protein S5	0	0	1	0.2	0	0	0	0	0	0	0	0	0	0	2	0.8	0	0	3	2
P62753	RPS6	40S ribosomal protein S6	0	0	0	0	0	0	1	0.2	0	0	2	0.4	0	0	1	0.4	1	0.2	5	4
P62081	RPS7	40S ribosomal protein S7	5	3.4	5	1.8	4	1.8	5	4	2	1.6	5	2	3	2.2	2	2	3	1.2	34	9
P62241	RPS8	40S ribosomal protein S8	3	0.8	0	0	1	0.2	3	1.4	2	0.6	1	0.4	2	0.6	1	0.2	3	1	16	8
P46781	RPS9	40S ribosomal protein S9	3	0.6	3	1	5	1.8	4	1	4	1.6	3	0.6	2	0.6	2	0.6	3	1	29	9
A0A0C4DG17	RPSA	40S ribosomal protein SA	5	3.6	5	5.8	5	3	5	5.2	5	7.4	4	1.4	5	6.4	5	4.8	5	5.4	44	9
Q8N122	RPTOR	Regulatory-associated protein of mTOR	0	0	0	0	0	0	1	0.2	0	0	0	0	0	0	0	0	0	0	1	1
P55042	RRAD	GTP-binding protein RAD	0	0	1	0.2	0	0	0	0	0	0	0	0	0	0	0	0	0	0	1	1
Q9P2E9	RRBP1	Ribosome-binding protein 1	4	3.2	3	1.4	5	3.2	5	3.4	5	2.8	3	1.8	5	4.2	5	2.4	5	3.2	40	9
Q7L4I2	RSRC2	Arginine/serine-rich coiled-coil protein 2	0	0	0	0	0	0	0	0	0	0	0	0	0	0	0	0	1	0.2	1	1
Q15404	RSU1	Ras suppressor protein 1	2	0.4	0	0	4	1.2	3	0.6	2	0.6	3	1	2	0.4	0	0	4	1	20	7
Q6ZR62	RTL4	Retrotransposon Gag-like protein 4	0	0	0	0	0	0	0	0	1	0.4	0	0	0	0	0	0	0	0	1	1
Q9NQC3	RTN4	Reticulon-4	5	12	5	11	5	10.4	5	8.8	5	10	5	10.8	5	10.8	5	10.4	5	12.4	45	9
Q86VV8	RTTN	Rotatin	1	0.2	0	0	0	0	1	0.2	0	0	0	0	0	0	0	0	0	0	2	2
A0A0A0MSU1	RUNX1T1	Protein CBFA2T1	0	0	0	0	0	0	1	0.2	0	0	0	0	0	0	0	0	0	0	1	1
Q9Y265	RUVBL1	RuvB-like 1	0	0	1	0.2	0	0	0	0	0	0	0	0	0	0	0	0	0	0	1	1
M0R0Y3	RUVBL2	RuvB-like helicase	0	0	0	0	0	0	0	0	0	0	0	0	1	0.2	0	0	0	0	1	1
Q8WXD0	RXFP2	Relaxin receptor 2	0	0	0	0	0	0	0	0	0	0	0	0	1	0.4	0	0	0	0	1	1
Q9Y2B1	RXYLT1	Ribitol-5-phosphate xylosyltransferase 1	0	0	0	0	0	0	1	0.2	0	0	0	0	0	0	0	0	0	0	1	1
P21817	RYR1	Ryanodine receptor 1	0	0	0	0	0	0	1	0.2	0	0	0	0	0	0	0	0	0	0	1	1
Q92736	RYR2	Ryanodine receptor 2	0	0	0	0	0	0	1	0.2	0	0	0	0	0	0	1	0.2	0	0	2	2
P0DTC2	S	Spike glycoprotein	0	0	0	0	0	0	1	0.2	0	0	0	0	0	0	0	0	0	0	1	1
P60903	S100A10	Protein S100-A10	0	0	1	0.4	4	2	3	1.2	4	2	2	1.2	2	1.2	2	0.8	2	0.8	20	8
P31949	S100A11	Protein S100-A11	5	3.2	5	4.4	5	3.2	5	4	4	2.8	5	4.4	3	2	4	4	3	1.2	39	9
Q99584	S100A13	Protein S100-A13	0	0	0	0	2	0.8	3	1.2	0	0	3	1.2	2	0.8	0	0	3	1.2	13	5
Q96FQ6	S100A16	Protein S100-A16	0	0	0	0	0	0	0	0	0	0	0	0	0	0	1	0.2	2	0.4	3	2
P06703	S100A6	Protein S100-A6	3	1	1	0.6	2	0.4	2	0.4	1	0.2	1	0.2	1	0.4	3	0.8	4	1	18	9
Q9Y3Z3	SAMHD1	Deoxynucleoside triphosphate triphosphohydrolase SAMHD1	0	0	0	0	0	0	0	0	2	0.8	2	1.6	0	0	0	0	0	0	4	2
Q9Y512	SAMM50	Sorting and assembly machinery component 50 homolog	0	0	0	0	0	0	0	0	0	0	0	0	0	0	1	0.2	0	0	1	1
Q9NR31	SAR1A	GTP-binding protein SAR1a	0	0	1	0.2	0	0	0	0	0	0	1	0.2	0	0	0	0	0	0	2	2
M0R2C6	SARS2	Uncharacterized protein (Fragment)	0	0	0	0	0	0	0	0	0	0	0	0	1	0.2	0	0	0	0	1	1
P21673	SAT1	Diamine acetyltransferase 1	0	0	0	0	0	0	1	0.2	0	0	0	0	0	0	0	0	0	0	1	1
A0A590UK17	SBK1	Serine/threonine-protein kinase SBK1	0	0	0	0	0	0	1	0.2	0	0	0	0	0	0	0	0	0	0	1	1
A3KN83	SBNO1	Protein strawberry notch homolog 1	1	0.2	0	0	0	0	0	0	0	0	0	0	0	0	0	0	0	0	1	1
Q8NBX0	SCCPDH	Saccharopine dehydrogenase-like oxidoreductase	0	0	4	2	4	2	2	1.6	3	1.2	5	2.6	3	1.4	3	1.6	4	2	28	8
Q9Y6U3	SCIN	Adseverin	0	0	0	0	0	0	0	0	0	0	0	0	0	0	0	0	1	0.2	1	1
A0A0U1RQQ9	SCYL2	SCY1-like protein 2	0	0	0	0	1	0.2	0	0	1	0.2	0	0	1	0.4	1	0.2	0	0	4	4
G5EA09	SDCBP	Syndecan binding protein (Syntenin), isoform CRA_a	0	0	0	0	0	0	0	0	0	0	0	0	0	0	0	0	2	0.4	2	1
Q6IQ49	SDE2	Replication stress response regulator SDE2	0	0	0	0	0	0	0	0	0	0	0	0	1	0.2	0	0	0	0	1	1
Q9NX18	SDHAF2	Succinate dehydrogenase assembly factor 2, mitochondrial	0	0	1	0.2	0	0	0	0	0	0	0	0	0	0	0	0	0	0	1	1
Q58EX2	SDK2	Protein sidekick-2	0	0	0	0	0	0	0	0	0	0	0	0	0	0	1	0.2	0	0	1	1
Q15436	SEC23A	Protein transport protein Sec23A	0	0	0	0	0	0	0	0	0	0	0	0	1	0.2	0	0	0	0	1	1
Q9Y6Y8	SEC23IP	SEC23-interacting protein	0	0	0	0	1	0.2	0	0	0	0	0	0	0	0	0	0	0	0	1	1
Q9UGP8	SEC63	Translocation protein SEC63 homolog	0	0	0	0	0	0	1	0.4	0	0	0	0	0	0	0	0	0	0	1	1
Q96T21	SECISBP2	Selenocysteine insertion sequence-binding protein 2	0	0	0	0	0	0	0	0	0	0	0	0	0	0	0	0	1	0.4	1	1
Q8WWX9	SELENOM	Selenoprotein M	0	0	0	0	0	0	0	0	0	0	0	0	0	0	1	0.4	1	0.2	2	2
Q9GZR1	SENP6	Sentrin-specific protease 6	0	0	1	0.4	0	0	0	0	0	0	0	0	0	0	0	0	0	0	1	1
Q99611	SEPHS2	Selenide, water dikinase 2	0	0	0	0	0	0	1	0.2	1	0.2	0	0	0	0	0	0	0	0	2	2
Q15019	SEPTIN2	Septin-2	0	0	0	0	0	0	0	0	0	0	0	0	0	0	0	0	1	0.4	1	1
E7EPK1	SEPTIN7	Septin-7	2	0.4	1	0.4	0	0	0	0	2	0.8	0	0	1	0.4	1	0.2	1	0.4	8	6
Q8NC51	SERBP1	Plasminogen activator inhibitor 1 RNA-binding protein	5	4	5	5.4	5	2.8	5	4.2	5	4.6	5	3.8	5	4.6	5	4.4	5	4	45	9
H0YE53	SERGEF	Secretion-regulating guanine nucleotide exchange factor (Fragment)	1	0.2	0	0	0	0	0	0	0	0	0	0	0	0	0	0	0	0	1	1
Q96SA4	SERINC2	Serine incorporator 2	1	0.2	0	0	0	0	0	0	1	0.2	0	0	0	0	0	0	0	0	2	2
Q13530	SERINC3	Serine incorporator 3	0	0	0	0	0	0	0	0	0	0	0	0	0	0	1	0.2	0	0	1	1
G3V4B4	SERPINA5	Plasma serine protease inhibitor (Fragment)	0	0	0	0	0	0	0	0	0	0	0	0	0	0	1	0.2	0	0	1	1
P36952	SERPINB5	Serpin B5	0	0	0	0	0	0	0	0	0	0	1	0.4	0	0	0	0	0	0	1	1
P50454	SERPINH1	Serpin H1	5	6.4	5	5.4	5	5.6	5	4.2	5	4	4	4.4	5	4.2	5	4.8	5	4.8	44	9
Q01105	SET	Protein SET	2	0.6	2	0.4	2	0.4	2	0.8	2	0.8	0	0	1	0.4	2	0.8	2	0.4	15	8
A0A1W2PPX9	SETD2	Histone-lysine N-methyltransferase SETD2	0	0	0	0	0	0	0	0	0	0	0	0	1	0.2	0	0	0	0	1	1
P0DME0	SETSIP	Protein SETSIP	3	1.4	1	0.4	3	1	2	1.6	1	0.8	2	1.2	2	1.2	2	1.8	2	1.4	18	9
Q7Z333	SETX	Probable helicase senataxin	1	0.2	0	0	0	0	0	0	0	0	0	0	0	0	0	0	0	0	1	1
Q15637	SF1	Splicing factor 1	2	0.6	1	0.4	3	0.6	4	1.2	3	0.6	4	0.8	1	0.2	1	0.2	2	0.6	21	9
O75533	SF3B1	Splicing factor 3B subunit 1	0	0	0	0	0	0	0	0	0	0	0	0	0	0	0	0	1	0.2	1	1
Q15427	SF3B4	Splicing factor 3B subunit 4	0	0	0	0	0	0	0	0	0	0	0	0	0	0	1	0.4	0	0	1	1
P23246	SFPQ	Splicing factor, proline- and glutamine-rich	5	4	5	4	5	4.2	5	4.2	5	4.6	5	3.6	5	3.8	5	3.2	5	4	45	9
Q9H9B4	SFXN1	Sideroflexin-1	1	0.4	3	0.6	3	0.6	2	0.4	4	0.8	1	0.4	3	0.8	4	0.8	0	0	21	8
Q13326	SGCG	Gamma-sarcoglycan	0	0	0	0	0	0	0	0	0	0	0	0	0	0	0	0	1	0.2	1	1
P51688	SGSH	N-sulphoglucosamine sulphohydrolase	0	0	0	0	1	0.2	0	0	0	0	0	0	0	0	0	0	0	0	1	1
Q9H299	SH3BGRL3	SH3 domain-binding glutamic acid-rich-like protein 3	3	1.2	5	2.6	5	4.6	2	4.8	2	3.4	4	2	3	2.4	5	6.6	4	2.6	33	9
H0Y9E7	SH3TC2	SH3 domain and tetratricopeptide repeat-containing protein 2 (Fragment)	1	0.2	0	0	0	0	0	0	0	0	0	0	0	0	0	0	0	0	1	1
H9KV90	SHANK1	SH3 and multiple ankyrin repeat domains protein 1	0	0	0	0	1	0.2	0	0	0	0	1	0.2	0	0	0	0	0	0	2	2
Q15464	SHB	SH2 domain-containing adapter protein B	0	0	0	0	1	0.2	0	0	0	0	0	0	0	0	0	0	0	0	1	1
A0A0B4J2A0	SHPK	FGGY_N domain-containing protein	0	0	1	0.2	0	0	0	0	0	0	0	0	0	0	0	0	0	0	1	1
Q96ST3	SIN3A	Paired amphipathic helix protein Sin3a	0	0	0	0	1	0.2	0	0	0	0	0	0	0	0	0	0	0	0	1	1
O43166	SIPA1L1	Signal-induced proliferation-associated 1-like protein 1	0	0	0	0	0	0	0	0	0	0	0	0	0	0	0	0	1	0.2	1	1
Q9P2F8	SIPA1L2	Signal-induced proliferation-associated 1-like protein 2	1	0.2	0	0	0	0	0	0	1	0.2	0	0	0	0	0	0	0	0	2	2
O60292	SIPA1L3	Signal-induced proliferation-associated 1-like protein 3	0	0	0	0	0	0	0	0	0	0	0	0	1	0.4	0	0	0	0	1	1
Q5JXA9	SIRPB2	Signal-regulatory protein beta-2	0	0	1	0.2	0	0	0	0	0	0	0	0	0	0	0	0	0	0	1	1
Q8IXJ6	SIRT2	NAD-dependent protein deacetylase sirtuin-2	0	0	0	0	0	0	0	0	0	0	0	0	0	0	0	0	1	0.2	1	1
O15304	SIVA1	Apoptosis regulatory protein Siva	0	0	0	0	0	0	0	0	0	0	0	0	0	0	1	0.2	0	0	1	1
P12755	SKI	Ski oncogene	0	0	0	0	0	0	0	0	0	0	0	0	0	0	0	0	1	0.2	1	1
P49279	SLC11A1	Natural resistance-associated macrophage protein 1	0	0	0	0	0	0	0	0	0	0	0	0	1	0.2	0	0	0	0	1	1
Q9UHW9	SLC12A6	Solute carrier family 12 member 6	0	0	0	0	0	0	0	0	0	0	0	0	1	0.2	0	0	0	0	1	1
A0A1C7CYV9	SLC22A17	Solute carrier family 22 member 17	0	0	0	0	0	0	0	0	0	0	1	0.2	0	0	0	0	0	0	1	1
P53007	SLC25A1	Tricarboxylate transport protein, mitochondrial	1	0.4	4	1.6	1	0.4	1	0.4	5	2.8	1	0.8	4	1.6	1	0.4	1	0.8	19	9
Q9H1K4	SLC25A18	Mitochondrial glutamate carrier 2	0	0	0	0	0	0	0	0	0	0	1	0.2	0	0	0	0	0	0	1	1
F8VVM2	SLC25A3	Phosphate carrier protein, mitochondrial	2	0.6	3	1	3	1.6	3	1.8	3	1.2	2	0.6	1	0.8	4	2	4	1.6	25	9
P05141	SLC25A5	ADP/ATP translocase 2	3	1.2	3	1.2	1	0.6	5	2.4	4	1.6	2	1.6	1	0.4	3	1.2	3	1.2	25	9
P12236	SLC25A6	ADP/ATP translocase 3	3	1	2	0.8	2	0.6	4	2.8	4	2.4	5	2.6	4	2.4	3	2	3	1.2	30	9
P50443	SLC26A2	Sulfate transporter	0	0	0	0	0	0	2	0.4	0	0	0	0	0	0	1	0.2	0	0	3	2
H0YDM5	SLC27A3	Solute carrier family 27 member 3 (Fragment)	0	0	0	0	0	0	0	0	0	0	0	0	0	0	1	0.2	0	0	1	1
Q6P1M0	SLC27A4	Long-chain fatty acid transport protein 4	0	0	0	0	0	0	0	0	0	0	0	0	0	0	0	0	1	0.2	1	1
Q9Y6M5	SLC30A1	Zinc transporter 1	0	0	1	0.2	0	0	0	0	1	0.2	0	0	0	0	0	0	0	0	2	2
Q6XR72	SLC30A10	Zinc transporter 10	0	0	0	0	0	0	0	0	0	0	0	0	0	0	0	0	1	0.2	1	1
P0C7Q6	SLC35G6	Solute carrier family 35 member G6	1	0.2	0	0	0	0	0	0	0	0	0	0	0	0	0	0	0	0	1	1
Q6YBV0	SLC36A4	Proton-coupled amino acid transporter 4	1	0.2	0	0	0	0	0	0	0	0	0	0	0	0	0	0	0	0	1	1
P57057	SLC37A1	Glucose-6-phosphate exchanger SLC37A1	0	0	0	0	0	0	0	0	0	0	0	0	1	0.2	0	0	0	0	1	1
Q9HBR0	SLC38A10	Putative sodium-coupled neutral amino acid transporter 10	0	0	0	0	0	0	1	0.2	0	0	0	0	0	0	0	0	0	0	1	1
Q9NVC3	SLC38A7	Putative sodium-coupled neutral amino acid transporter 7	0	0	0	0	0	0	0	0	0	0	0	0	0	0	1	0.2	0	0	1	1
Q92504	SLC39A7	Zinc transporter SLC39A7	2	1.2	0	0	4	2.4	4	2	4	2.8	1	0.8	4	2.4	4	2.8	4	1.6	27	8
H0YEH0	SLC43A1	Large neutral amino acids transporter small subunit 3 (Fragment)	0	0	1	0.2	0	0	0	0	0	0	0	0	0	0	0	0	0	0	1	1
C9JRP1	SLC4A7	Anion exchange protein (Fragment)	1	0.2	0	0	0	0	0	0	1	0.2	0	0	0	0	0	0	0	0	2	2
A0A1W2PR06	SLC7A2	Cationic amino acid transporter 2 (Fragment)	0	0	0	0	0	0	1	0.2	0	0	0	0	0	0	0	0	0	0	1	1
Q01650	SLC7A5	Large neutral amino acids transporter small subunit 1	0	0	0	0	0	0	1	0.2	0	0	0	0	0	0	0	0	0	0	1	1
Q9UHI5	SLC7A8	Large neutral amino acids transporter small subunit 2	0	0	0	0	0	0	0	0	0	0	0	0	0	0	0	0	1	0.2	1	1
Q6J4K2	SLC8B1	Mitochondrial sodium/calcium exchanger protein	1	0.2	0	0	1	0.4	0	0	0	0	0	0	0	0	0	0	0	0	2	2
A0A0A6YYJ9	SLCO1B3	Solute carrier organic anion transporter family member	1	0.2	0	0	0	0	0	0	1	0.2	0	0	0	0	0	0	0	0	2	2
Q9NYB5	SLCO1C1	Solute carrier organic anion transporter family member 1C1	0	0	0	0	0	0	0	0	0	0	0	0	0	0	1	0.2	0	0	1	1
Q8IX21	SLF2	SMC5-SMC6 complex localization factor protein 2	0	0	1	0.2	0	0	0	0	0	0	0	0	0	0	0	0	0	0	1	1
P0C7P3	SLFN14	Protein SLFN14	0	0	0	0	0	0	0	0	0	0	1	0.2	0	0	0	0	0	0	1	1
Q08AF3	SLFN5	Schlafen family member 5	0	0	0	0	0	0	0	0	1	0.4	0	0	0	0	0	0	0	0	1	1
A0A087WYV5	SLIT2	Slit homolog 2 protein	0	0	0	0	0	0	0	0	0	0	0	0	0	0	0	0	1	0.2	1	1
O94991	SLITRK5	SLIT and NTRK-like protein 5	0	0	1	0.2	0	0	0	0	0	0	0	0	0	0	0	0	0	0	1	1
Q9H5Y7	SLITRK6	SLIT and NTRK-like protein 6	0	0	1	0.2	0	0	0	0	0	0	0	0	0	0	0	0	0	0	1	1
F8VXC8	SMARCC2	SWI/SNF complex subunit SMARCC2	0	0	0	0	0	0	0	0	0	0	0	0	1	0.4	0	0	0	0	1	1
Q92925	SMARCD2	SWI/SNF-related matrix-associated actin-dependent regulator of chromatin subfamily D member 2	0	0	1	0.2	0	0	0	0	0	0	0	0	0	0	0	0	0	0	1	1
Q9UQE7	SMC3	Structural maintenance of chromosomes protein 3	0	0	0	0	1	0.2	0	0	0	0	1	0.2	0	0	0	0	1	0.2	3	3
Q9NTJ3	SMC4	Structural maintenance of chromosomes protein 4	0	0	0	0	0	0	0	0	0	0	1	0.2	0	0	0	0	0	0	1	1
A6NHR9	SMCHD1	Structural maintenance of chromosomes flexible hinge domain-containing protein 1	0	0	0	0	0	0	1	0.8	0	0	0	0	0	0	0	0	0	0	1	1
Q9NXE4	SMPD4	Sphingomyelin phosphodiesterase 4	1	0.2	0	0	1	0.2	1	0.4	0	0	1	0.2	1	0.2	0	0	0	0	5	5
Q9H7B4	SMYD3	Histone-lysine N-methyltransferase SMYD3	0	0	1	0.2	0	0	0	0	0	0	0	0	0	0	1	0.2	0	0	2	2
Q7KZF4	SND1	Staphylococcal nuclease domain-containing protein 1	1	0.2	1	0.4	3	0.8	3	1	1	0.2	0	0	4	1.4	3	0.8	3	0.8	19	8
Q8TER0	SNED1	Sushi, nidogen and EGF-like domain-containing protein 1	0	0	0	0	0	0	1	0.2	0	0	0	0	0	0	0	0	0	0	1	1
P62314	SNRPD1	Small nuclear ribonucleoprotein Sm D1	5	3	5	2.8	5	3.2	5	2.2	5	2.2	5	3.2	3	1.4	5	2.8	4	2.4	42	9
P62318	SNRPD3	Small nuclear ribonucleoprotein Sm D3	0	0	0	0	0	0	1	0.2	0	0	0	0	1	0.2	0	0	0	0	2	2
P62304	SNRPE	Small nuclear ribonucleoprotein E	0	0	0	0	0	0	0	0	0	0	2	0.4	0	0	1	0.2	2	0.4	5	3
A0A087X0R6	SNX12	Sorting nexin-12	0	0	0	0	0	0	0	0	0	0	0	0	0	0	0	0	1	0.2	1	1
P35610	SOAT1	Sterol O-acyltransferase 1	2	0.8	0	0	0	0	0	0	1	0.4	0	0	1	0.4	0	0	0	0	4	3
A7XYQ1	SOBP	Sine oculis-binding protein homolog	0	0	0	0	0	0	0	0	0	0	0	0	0	0	0	0	1	0.2	1	1
P00441	SOD1	Superoxide dismutase [Cu-Zn]	5	4	5	4	5	4.2	5	2.8	5	3.4	5	3.4	5	3.4	5	3.2	5	4.8	45	9
P04179	SOD2	Superoxide dismutase [Mn], mitochondrial	0	0	0	0	4	2	0	0	0	0	5	5.6	0	0	0	0	5	4	14	3
C9K0N6	SOS1	Son of sevenless homolog 1 (Fragment)	0	0	0	0	1	0.2	0	0	0	0	0	0	0	0	0	0	0	0	1	1
P56693	SOX10	Transcription factor SOX-10	0	0	0	0	0	0	0	0	1	0.2	0	0	1	0.2	0	0	0	0	2	2
A0A0A0MRY4	SPATA13	Uncharacterized protein	1	0.2	0	0	0	0	0	0	0	0	0	0	0	0	0	0	0	0	1	1
Q5VU36	SPATA31A5	Spermatogenesis-associated protein 31A5	0	0	0	0	0	0	0	0	0	0	0	0	1	0.2	0	0	0	0	1	1
P0DKV0	SPATA31C1	Putative spermatogenesis-associated protein 31C1	0	0	1	0.2	0	0	0	0	0	0	0	0	0	0	0	0	0	0	1	1
P0C874	SPATA31D3	Spermatogenesis-associated protein 31D3	0	0	1	0.2	0	0	0	0	0	0	0	0	0	0	0	0	0	0	1	1
Q9H0A9	SPATC1L	Speriolin-like protein	1	0.2	0	0	0	0	0	0	0	0	0	0	0	0	0	0	0	0	1	1
Q9Y6A9	SPCS1	Signal peptidase complex subunit 1	0	0	0	0	0	0	0	0	0	0	0	0	0	0	0	0	1	0.2	1	1
P61009	SPCS3	Signal peptidase complex subunit 3	0	0	0	0	0	0	0	0	0	0	0	0	1	0.4	0	0	0	0	1	1
A0A494C1J1	SPECC1L	Cytospin-A	0	0	0	0	1	0.2	0	0	0	0	0	0	0	0	0	0	0	0	1	1
H7BZM6	SPEGNB	Uncharacterized protein (Fragment)	0	0	0	0	0	0	0	0	0	0	0	0	0	0	0	0	1	0.2	1	1
Q14159	SPIDR	DNA repair-scaffolding protein	0	0	1	0.2	0	0	0	0	1	0.2	0	0	0	0	0	0	0	0	2	2
Q9NQ38	SPINK5	Serine protease inhibitor Kazal-type 5	0	0	0	0	1	0.2	0	0	0	0	0	0	0	0	0	0	0	0	1	1
H0YF46	SPOCD1	SPOC domain-containing protein 1 (Fragment)	0	0	0	0	0	0	0	0	0	0	1	0.2	0	0	0	0	0	0	1	1
O43791	SPOP	Speckle-type POZ protein	0	0	0	0	0	0	0	0	1	0.2	0	0	0	0	0	0	0	0	1	1
Q8TCT6	SPPL3	Signal peptide peptidase-like 3	0	0	0	0	0	0	1	0.2	0	0	0	0	0	0	0	0	0	0	1	1
K7EKP4	SPRED3	HCG1647763	0	0	0	0	0	0	0	0	0	0	0	0	1	0.2	0	0	1	0.2	2	2
Q96A44	SPSB4	SPRY domain-containing SOCS box protein 4	1	0.2	0	0	0	0	0	0	0	0	0	0	0	0	0	0	0	0	1	1
A0A0D9SGF6	SPTAN1	Spectrin alpha chain, non-erythrocytic 1	1	0.2	3	1	3	1.2	3	1.2	2	0.6	4	1	1	0.2	4	1.2	4	1.2	25	9
A0A087WUZ3	SPTBN1	Spectrin beta chain	1	0.8	1	0.2	2	0.6	1	0.6	0	0	1	0.4	0	0	1	0.2	3	1.2	10	7
O15020	SPTBN2	Spectrin beta chain, non-erythrocytic 2	0	0	0	0	0	0	1	0.2	0	0	0	0	0	0	1	0.2	0	0	2	2
Q13501	SQSTM1	Sequestosome-1	0	0	0	0	0	0	0	0	0	0	1	0.2	0	0	0	0	0	0	1	1
H0Y7E5	SREBF2	Sterol regulatory element-binding protein 2 (Fragment)	0	0	0	0	0	0	0	0	0	0	0	0	0	0	0	0	1	0.2	1	1
P30626	SRI	Sorcin	0	0	0	0	1	0.2	2	0.4	1	0.2	0	0	1	0.2	0	0	1	0.2	6	5
A0A286YF08	SRRM4	Serine/arginine repetitive matrix protein 4 (Fragment)	0	0	0	0	1	0.2	0	0	0	0	0	0	0	0	0	0	0	0	1	1
J3KTL2	SRSF1	Serine/arginine-rich-splicing factor 1	0	0	1	0.2	0	0	0	0	0	0	0	0	0	0	1	0.2	0	0	2	2
Q01130	SRSF2	Serine/arginine-rich splicing factor 2	1	0.2	1	0.4	0	0	0	0	0	0	0	0	1	0.2	0	0	1	0.2	4	4
P84103	SRSF3	Serine/arginine-rich splicing factor 3	1	0.2	0	0	0	0	0	0	0	0	0	0	0	0	0	0	0	0	1	1
Q13243	SRSF5	Serine/arginine-rich splicing factor 5	0	0	0	0	1	0.2	0	0	0	0	0	0	0	0	0	0	0	0	1	1
Q9BRL6	SRSF8	Serine/arginine-rich splicing factor 8	1	0.2	0	0	0	0	0	0	0	0	1	0.2	0	0	1	0.2	0	0	3	3
J3QQM2	SS18	Protein SSXT	0	0	0	0	1	0.2	0	0	0	0	0	0	0	0	0	0	0	0	1	1
P05455	SSB	Lupus La protein	0	0	0	0	1	0.4	0	0	0	0	0	0	0	0	0	0	0	0	1	1
Q04837	SSBP1	Single-stranded DNA-binding protein, mitochondrial	2	0.4	0	0	0	0	0	0	3	0.8	4	0.8	1	0.2	0	0	2	0.4	12	5
P51571	SSR4	Translocon-associated protein subunit delta	0	0	0	0	0	0	0	0	0	0	0	0	1	0.4	0	0	1	0.2	2	2
A0A087WXB8	ST3GAL6	ST3 beta-galactoside alpha-2,3-sialyltransferase 6, isoform CRA_b	0	0	2	0.4	0	0	1	0.2	0	0	0	0	1	0.2	0	0	0	0	4	3
Q92187	ST8SIA4	CMP-N-acetylneuraminate-poly-alpha-2,8-sialyltransferase	0	0	0	0	0	0	0	0	1	0.2	0	0	0	0	0	0	0	0	1	1
Q9Y3M8	STARD13	StAR-related lipid transfer protein 13	0	0	1	0.2	0	0	0	0	0	0	0	0	0	0	0	0	0	0	1	1
P31948	STIP1	Stress-induced-phosphoprotein 1	0	0	0	0	2	0.4	0	0	0	0	0	0	0	0	0	0	0	0	2	1
F5H277	STK38L	Serine/threonine-protein kinase 38-like (Fragment)	1	0.2	0	0	1	0.2	1	0.2	1	0.2	1	0.4	0	0	0	0	2	0.8	7	6
Q93045	STMN2	Stathmin-2	1	0.2	0	0	0	0	0	0	0	0	0	0	0	0	0	0	0	0	1	1
P27105	STOM	Erythrocyte band 7 integral membrane protein	0	0	0	0	0	0	0	0	0	0	0	0	0	0	0	0	1	0.2	1	1
Q9UJZ1	STOML2	Stomatin-like protein 2, mitochondrial	0	0	0	0	0	0	0	0	0	0	1	0.2	0	0	1	0.4	0	0	2	2
Q53S48	STON1-GTF2A1L	Stonin-1	0	0	0	0	0	0	0	0	1	0.2	0	0	0	0	0	0	0	0	1	1
Q9ULQ0	STRIP2	Striatin-interacting protein 2	1	0.2	0	0	0	0	0	0	0	0	0	0	0	0	0	0	0	0	1	1
Q9P2W9	STX18	Syntaxin-18	0	0	0	0	0	0	0	0	0	0	1	0.2	0	0	1	0.2	0	0	2	2
Q9Y2K9	STXBP5L	Syntaxin-binding protein 5-like	0	0	0	0	0	0	0	0	0	0	0	0	1	0.2	0	0	0	0	1	1
Q8IWU6	SULF1	Extracellular sulfatase Sulf-1	1	0.4	0	0	1	0.2	1	0.2	1	0.2	0	0	0	0	1	0.2	2	0.4	7	6
A8MU27	SUMO3	Small ubiquitin-related modifier 3	3	2	2	1.2	4	2.4	5	3.2	3	2.4	4	2	5	3.2	5	3.6	4	3.2	35	9
Q3ZLR7	SUPT20HL1	Transcription factor SPT20 homolog-like 1	0	0	0	0	0	0	0	0	0	0	1	0.2	0	0	0	0	0	0	1	1
Q6UWL2	SUSD1	Sushi domain-containing protein 1	0	0	0	0	0	0	0	0	0	0	0	0	1	0.2	0	0	0	0	1	1
O60279	SUSD5	Sushi domain-containing protein 5	1	0.2	0	0	0	0	0	0	0	0	0	0	0	0	0	0	0	0	1	1
Q8N434	SVOPL	Putative transporter SVOPL	1	0.2	0	0	0	0	0	0	0	0	0	0	0	0	0	0	0	0	1	1
Q9UH65	SWAP70	Switch-associated protein 70	1	0.2	0	0	0	0	0	0	0	0	0	0	0	0	0	0	0	0	1	1
A0A0C4DG86	SYBU	Syntabulin	0	0	0	0	0	0	0	0	0	0	0	0	0	0	1	0.2	0	0	1	1
O14994	SYN3	Synapsin-3	0	0	1	0.2	1	0.2	0	0	0	0	0	0	0	0	0	0	1	0.2	3	3
O60506	SYNCRIP	Heterogeneous nuclear ribonucleoprotein Q	0	0	0	0	0	0	0	0	1	0.2	0	0	0	0	0	0	0	0	1	1
E7ENN3	SYNE1	Nesprin-1	0	0	0	0	1	0.2	0	0	0	0	0	0	0	0	0	0	0	0	1	1
Q86TM6	SYVN1	E3 ubiquitin-protein ligase synoviolin	0	0	0	0	0	0	0	0	1	0.4	0	0	0	0	0	0	0	0	1	1
F8WDF4	SZRD1	SUZ domain-containing protein 1	0	0	1	0.4	0	0	0	0	0	0	0	0	0	0	0	0	0	0	1	1
Q9Y6A5	TACC3	Transforming acidic coiled-coil-containing protein 3	0	0	0	0	0	0	0	0	0	0	0	0	1	0.2	0	0	0	0	1	1
P09758	TACSTD2	Tumor-associated calcium signal transducer 2	0	0	0	0	0	0	0	0	1	0.2	0	0	0	0	0	0	0	0	1	1
P21675	TAF1	Transcription initiation factor TFIID subunit 1	0	0	1	0.2	0	0	0	0	0	0	0	0	0	0	0	0	0	0	1	1
P37802	TAGLN2	Transgelin-2	5	4.8	5	6.6	5	5.2	5	4.8	5	5.2	5	5	5	3.6	5	4	5	3.6	45	9
P37837	TALDO1	Transaldolase	1	1	1	0.4	3	1.6	3	1.6	0	0	2	1.2	2	0.8	3	2	2	2	17	8
Q9BX59	TAPBPL	Tapasin-related protein	0	0	0	0	1	0.2	0	0	0	0	0	0	0	0	0	0	0	0	1	1
F8VTT7	TARBP2	RISC-loading complex subunit TARBP2	0	0	0	0	0	0	0	0	1	0.2	0	0	0	0	0	0	0	0	1	1
Q13148	TARDBP	TAR DNA-binding protein 43	0	0	2	0.4	0	0	0	0	1	0.2	0	0	1	0.2	1	0.2	1	0.2	6	5
A0A087X1Q6	TARM1	T-cell-interacting,-activating receptor on myeloid cells protein 1	0	0	0	0	1	0.2	0	0	0	0	0	0	1	0.2	0	0	0	0	2	2
P59533	TAS2R38	Taste receptor type 2 member 38	0	0	0	0	0	0	1	0.2	0	0	0	0	0	0	0	0	0	0	1	1
A0A0A0MSR7	TBATA	Protein TBATA	0	0	0	0	1	0.2	0	0	0	0	0	0	0	0	0	0	0	0	1	1
Q96DN5	TBC1D31	TBC1 domain family member 31	0	0	0	0	0	0	0	0	0	0	0	0	0	0	1	0.2	0	0	1	1
O60343	TBC1D4	TBC1 domain family member 4	0	0	0	0	0	0	0	0	0	0	0	0	0	0	0	0	1	0.2	1	1
Q92609	TBC1D5	TBC1 domain family member 5	0	0	1	0.2	1	0.2	0	0	0	0	0	0	0	0	0	0	1	0.2	3	3
J3KR97	TBCD	Tubulin-specific chaperone D	0	0	0	0	0	0	0	0	0	0	0	0	0	0	1	0.2	0	0	1	1
O60907	TBL1X	F-box-like/WD repeat-containing protein TBL1X	0	0	0	0	1	0.2	0	0	0	0	0	0	0	0	0	0	0	0	1	1
A0A3B3IS18	TBX1	T-box transcription factor TBX1	0	0	0	0	1	0.2	0	0	0	0	0	0	0	0	0	0	0	0	1	1
Q9UGU0	TCF20	Transcription factor 20	1	0.2	0	0	0	0	0	0	0	0	0	0	0	0	0	0	0	0	1	1
Q9BQ70	TCF25	Transcription factor 25	1	0.4	0	0	0	0	0	0	0	0	0	0	0	0	0	0	0	0	1	1
P17987	TCP1	T-complex protein 1 subunit alpha	2	1.2	1	0.4	3	1.2	2	0.6	3	1.2	0	0	2	0.6	1	0.2	1	0.4	15	8
B5MCY1	TDRD15	Tudor domain-containing protein 15	0	0	0	0	0	0	0	0	0	0	0	0	0	0	1	0.2	0	0	1	1
Q8NDG6	TDRD9	ATP-dependent RNA helicase TDRD9	0	0	0	0	0	0	0	0	0	0	0	0	0	0	1	0.2	0	0	1	1
A0A2R8YGB5	TECTB	Beta-tectorin	0	0	0	0	0	0	0	0	0	0	0	0	1	0.2	0	0	0	0	1	1
Q15569	TESK1	Dual specificity testis-specific protein kinase 1	1	0.2	0	0	0	0	0	0	0	0	0	0	0	0	0	0	0	0	1	1
A0A1W2PS94	TEX15	Testis-expressed protein 15	0	0	0	0	0	0	0	0	1	0.2	0	0	0	0	0	0	0	0	1	1
B0QYS7	TFEB	Transcription factor EB	0	0	2	0.4	0	0	0	0	0	0	0	0	0	0	0	0	0	0	2	1
P01266	TG	Thyroglobulin	0	0	0	0	0	0	0	0	0	0	1	0.2	0	0	0	0	0	0	1	1
F8VW34	TGIF1	Homeobox protein TGIF1 (Fragment)	0	0	1	0.2	0	0	0	0	0	0	0	0	0	0	0	0	0	0	1	1
P21980	TGM2	Protein-glutamine gamma-glutamyltransferase 2	4	2	3	2.8	5	4.6	5	4	5	3.4	5	4	4	2.6	5	2.8	5	3	41	9
P07996	THBS1	Thrombospondin-1	5	1.8	1	0.4	4	2	5	2.4	4	2.4	2	0.8	3	1.2	3	1.8	5	2.8	32	9
P35443	THBS4	Thrombospondin-4	1	0.2	0	0	0	0	0	0	0	0	0	0	0	0	0	0	0	0	1	1
Q86YJ6	THNSL2	Threonine synthase-like 2	2	0.4	0	0	2	0.4	1	0.2	1	0.2	0	0	1	0.2	0	0	1	0.2	8	6
P10828	THRB	Thyroid hormone receptor beta	0	0	0	0	0	0	0	0	0	0	0	0	0	0	0	0	1	0.2	1	1
A0A087WY08	THSD7A	Thrombospondin type-1 domain-containing protein 7A	0	0	0	0	0	0	0	0	0	0	0	0	0	0	1	0.2	0	0	1	1
Q9BTF0	THUMPD2	THUMP domain-containing protein 2	0	0	1	0.2	0	0	1	0.2	0	0	1	0.2	0	0	0	0	0	0	3	3
Q7Z2Z1	TICRR	Treslin	1	0.2	1	0.2	1	0.2	0	0	1	0.2	1	0.2	0	0	0	0	1	0.2	6	6
Q96MW7	TIGD1	Tigger transposable element-derived protein 1	0	0	0	0	0	0	0	0	0	0	0	0	0	0	0	0	1	0.2	1	1
G3XAN8	TIMM8B	Mitochondrial import inner membrane translocase subunit Tim8 B	0	0	0	0	0	0	0	0	0	0	0	0	0	0	0	0	1	0.2	1	1
A0A2R8YDH4	TJP2	Uncharacterized protein	2	0.8	2	0.6	2	0.8	1	0.2	1	0.4	1	0.4	0	0	0	0	2	0.8	11	7
P29401	TKT	Transketolase	5	16	5	19.6	5	18.6	5	18.6	5	17.4	5	18	5	16.8	5	17	5	15.2	45	9
E7EQH3	TLE4	Transducin-like enhancer protein 4	0	0	0	0	0	0	0	0	0	0	0	0	1	0.2	0	0	0	0	1	1
Q9Y6L7	TLL2	Tolloid-like protein 2	0	0	1	0.2	0	0	0	0	0	0	0	0	0	0	1	0.2	0	0	2	2
Q9Y490	TLN1	Talin-1	5	8	5	10.2	5	7.8	5	7.4	5	9.4	5	7.2	5	7.8	5	7.6	5	5.2	45	9
H0YMT1	TLN2	Talin-2 (Fragment)	1	0.4	0	0	0	0	1	0.4	1	0.4	0	0	0	0	0	0	0	0	3	3
Q9BXR5	TLR10	Toll-like receptor 10	1	0.2	0	0	0	0	0	0	0	0	0	0	0	0	0	0	0	0	1	1
Q92544	TM9SF4	Transmembrane 9 superfamily member 4	1	0.2	0	0	0	0	0	0	0	0	0	0	0	0	0	0	0	0	1	1
G3V1R8	TMBIM4	Protein lifeguard 4	2	0.4	0	0	0	0	0	0	0	0	0	0	0	0	0	0	0	0	2	1
H3BNW8	TMC7	Transmembrane channel-like protein	0	0	0	0	0	0	0	0	0	0	0	0	1	0.2	0	0	0	0	1	1
P49755	TMED10	Transmembrane emp24 domain-containing protein 10	5	1.6	3	1.2	4	1.4	3	1.2	3	1.2	3	1.2	3	1	2	0.6	3	1.2	29	9
E9PJW0	TMEM123	Porimin (Fragment)	0	0	0	0	0	0	0	0	0	0	0	0	0	0	0	0	1	0.2	1	1
A2VDJ0	TMEM131L	Transmembrane protein 131-like	0	0	1	0.2	0	0	0	0	0	0	0	0	0	0	0	0	0	0	1	1
C9JVE9	TMEM168	Transmembrane protein 168 (Fragment)	1	0.2	0	0	0	0	0	0	0	0	0	0	0	0	0	0	0	0	1	1
J3KRY7	TMEM208	HSPC171 protein, isoform CRA_a	0	0	0	0	1	0.2	0	0	1	0.4	0	0	0	0	0	0	0	0	2	2
Q9NV96	TMEM30A	Cell cycle control protein 50A	0	0	0	0	1	0.2	0	0	0	0	0	0	0	0	0	0	0	0	1	1
Q12767	TMEM94	Transmembrane protein 94	0	0	1	0.2	0	0	0	0	0	0	0	0	0	0	0	0	0	0	1	1
Q8N816	TMEM99	Transmembrane protein 99	0	0	0	0	1	0.2	0	0	0	0	0	0	0	0	0	0	0	0	1	1
Q9Y320	TMX2	Thioredoxin-related transmembrane protein 2	1	0.2	0	0	0	0	0	0	0	0	0	0	0	0	0	0	0	0	1	1
O95407	TNFRSF6B	Tumor necrosis factor receptor superfamily member 6B	1	0.2	0	0	0	0	0	0	0	0	0	0	0	0	0	0	1	0.2	2	2
P28908	TNFRSF8	Tumor necrosis factor receptor superfamily member 8	0	0	0	0	0	0	0	0	0	0	1	0.2	0	0	0	0	0	0	1	1
P41273	TNFSF9	Tumor necrosis factor ligand superfamily member 9	0	0	0	0	0	0	0	0	1	0.2	0	0	0	0	0	0	0	0	1	1
Q9UKE5	TNIK	TRAF2 and NCK-interacting protein kinase	0	0	0	0	1	0.2	0	0	0	0	0	0	0	0	0	0	0	0	1	1
Q07912	TNK2	Activated CDC42 kinase 1	0	0	1	0.2	0	0	0	0	0	0	0	0	0	0	0	0	0	0	1	1
O95271	TNKS	Poly [ADP-ribose] polymerase tankyrase-1	0	0	1	0.2	0	0	0	0	0	0	0	0	0	0	0	0	0	0	1	1
Q9H2K2	TNKS2	Poly [ADP-ribose] polymerase tankyrase-2	0	0	0	0	0	0	0	0	0	0	1	0.2	0	0	0	0	0	0	1	1
Q92973	TNPO1	Transportin-1	1	0.2	0	0	0	0	0	0	0	0	0	0	0	0	0	0	0	0	1	1
Q63HR2	TNS2	Tensin-2	0	0	0	0	1	0.2	0	0	0	0	0	0	0	0	0	0	0	0	1	1
Q8IZW8	TNS4	Tensin-4	0	0	0	0	0	0	0	0	0	0	0	0	0	0	0	0	1	0.2	1	1
E9PMY0	TP53I11	Tumor protein p53-inducible protein 11 (Fragment)	0	0	0	0	0	0	0	0	0	0	1	0.2	0	0	0	0	0	0	1	1
J3KRJ1	TP53I13	Tumor protein p53-inducible protein 13 (Fragment)	0	0	0	0	0	0	0	0	0	0	0	0	1	0.2	0	0	0	0	1	1
A0A087WYR3	TPD52L2	Tumor protein D54	0	0	1	0.2	0	0	1	0.4	2	0.4	1	0.2	1	0.2	1	0.2	0	0	7	6
P60174	TPI1	Triosephosphate isomerase	5	14.2	5	13	5	14.6	5	14.4	5	15.8	5	13.4	5	13.8	5	15.2	5	16.2	45	9
Q6ZN40	TPM1	Tropomyosin 1 (Alpha), isoform CRA_f	4	1.4	4	1	3	1	5	1.4	5	2.4	4	1.6	5	2.8	5	2.8	4	1.8	39	9
A0A087WWU8	TPM3	Tropomyosin alpha-3 chain	5	3.8	5	2.4	5	4.8	5	3.4	5	2.8	5	3.8	5	3.8	5	4.4	5	3.6	45	9
P67936	TPM4	Tropomyosin alpha-4 chain	5	8	5	9.2	5	10	5	6.6	5	7.4	5	7.4	5	8.6	5	9.8	5	9.4	45	9
O60507	TPST1	Protein-tyrosine sulfotransferase 1	0	0	0	0	0	0	0	0	0	0	0	0	0	0	0	0	1	0.2	1	1
A0A0B4J2C3	TPT1	Translationally-controlled tumor protein	0	0	1	0.2	1	0.2	1	0.2	0	0	1	0.2	1	0.2	2	0.4	0	0	7	6
Q9ULW0	TPX2	Targeting protein for Xklp2	0	0	0	0	0	0	0	0	0	0	0	0	1	0.2	0	0	0	0	1	1
A0A2R8YEM9	TRANK1	TPR and ankyrin repeat-containing protein 1	0	0	0	0	0	0	0	0	0	0	1	0.2	0	0	0	0	0	0	1	1
Q8WVT3	TRAPPC12	Trafficking protein particle complex subunit 12	0	0	1	0.2	0	0	0	0	0	0	0	0	0	0	0	0	0	0	1	1
A0A087X0M5	TRBV18	T cell receptor beta variable 18	0	0	1	0.2	0	0	0	0	0	0	0	0	0	0	0	0	0	0	1	1
P36406	TRIM23	E3 ubiquitin-protein ligase TRIM23	1	0.2	0	0	0	0	0	0	0	0	0	0	0	0	0	0	0	0	1	1
Q13263	TRIM28	Transcription intermediary factor 1-beta	0	0	2	0.4	0	0	0	0	1	0.2	0	0	1	0.2	1	0.2	0	0	5	4
Q13049	TRIM32	E3 ubiquitin-protein ligase TRIM32	0	0	0	0	0	0	1	0.2	0	0	0	0	0	0	0	0	0	0	1	1
Q9C037	TRIM4	E3 ubiquitin-protein ligase TRIM4	0	0	0	0	0	0	0	0	0	0	0	0	1	0.2	0	0	0	0	1	1
A0A494C0U7	TRIM61	Putative tripartite motif-containing protein 61	0	0	0	0	0	0	0	0	0	0	1	0.2	0	0	0	0	0	0	1	1
A6NGJ6	TRIM64	Tripartite motif-containing protein 64	0	0	0	0	1	0.2	0	0	0	0	0	0	0	0	0	0	0	0	1	1
Q6AZZ1	TRIM68	E3 ubiquitin-protein ligase TRIM68	0	0	0	0	0	0	0	0	0	0	0	0	0	0	1	0.2	0	0	1	1
O75962	TRIO	Triple functional domain protein	0	0	0	0	0	0	1	0.2	0	0	0	0	0	0	0	0	0	0	1	1
F6XBY7	TRMT9B	Probable tRNA methyltransferase 9B	0	0	0	0	0	0	0	0	0	0	0	0	0	0	1	0.2	0	0	1	1
Q9Y210	TRPC6	Short transient receptor potential channel 6	0	0	0	0	0	0	0	0	0	0	0	0	0	0	1	0.4	0	0	1	1
Q9HCF6	TRPM3	Transient receptor potential cation channel subfamily M member 3	1	0.2	0	0	0	0	0	0	0	0	0	0	0	0	0	0	0	0	1	1
J3KQ42	TSPAN4	Tetraspanin	1	0.2	1	0.2	0	0	0	0	0	0	0	0	2	0.4	0	0	1	0.2	5	4
A0A087WZU5	TSPAN6	Tetraspanin-6	1	0.4	0	0	0	0	0	0	0	0	0	0	0	0	0	0	0	0	1	1
P30536	TSPO	Translocator protein	0	0	0	0	0	0	0	0	0	0	0	0	1	0.2	1	0.2	0	0	2	2
Q8N831	TSPYL6	Testis-specific Y-encoded-like protein 6	0	0	0	0	0	0	0	0	0	0	0	0	1	0.2	0	0	0	0	1	1
Q16762	TST	Thiosulfate sulfurtransferase	0	0	0	0	0	0	1	0.2	0	0	0	0	0	0	0	0	0	0	1	1
Q99614	TTC1	Tetratricopeptide repeat protein 1	0	0	1	0.2	0	0	0	0	0	0	0	0	0	0	0	0	1	0.2	2	2
J3KR69	TTC12	Tetratricopeptide repeat domain 12, isoform CRA_d	0	0	0	0	0	0	0	0	1	0.2	0	0	0	0	0	0	0	0	1	1
Q15361	TTF1	Transcription termination factor 1	0	0	0	0	0	0	0	0	0	0	1	0.4	0	0	0	0	0	0	1	1
Q14166	TTLL12	Tubulin--tyrosine ligase-like protein 12	0	0	0	0	0	0	0	0	0	0	0	0	1	0.2	0	0	0	0	1	1
A0A0A0MTS7	TTN	Titin	3	0.8	1	0.4	3	1	2	0.4	4	1	4	1	5	1	4	0.8	3	0.6	29	9
E9PQR4	TUB	Tubby-like protein	0	0	0	0	0	0	1	0.2	0	0	0	0	0	0	0	0	0	0	1	1
Q71U36	TUBA1A	Tubulin alpha-1A chain	3	2.4	2	1.4	3	4.6	2	3.6	3	7.6	2	2.4	2	4.2	3	3.4	3	5.2	23	9
P68363	TUBA1B	Tubulin alpha-1B chain	2	2.8	3	4.2	2	3	3	5.6	2	3.4	3	3.6	3	4	2	2.8	2	2.4	22	9
F5H5D3	TUBA1C	Tubulin alpha chain	5	4.6	5	4.4	5	6.2	5	8	5	8.6	5	5.6	5	5.6	5	6	5	6.4	45	9
P07437	TUBB	Tubulin beta chain	5	26	5	26.4	5	24.4	5	27.6	5	22.6	5	24.8	5	25.6	5	22	5	23.4	45	9
Q13885	TUBB2A	Tubulin beta-2A chain	2	10.2	3	14	2	8.8	3	15	2	8.6	3	13.8	3	15.8	2	9.4	2	8.4	22	9
P04350	TUBB4A	Tubulin beta-4A chain	2	5.8	3	8	2	5.4	3	9.6	2	6.6	3	9	3	9.6	2	5.6	2	5.6	22	9
P68371	TUBB4B	Tubulin beta-4B chain	3	14.8	2	10.8	3	14.8	2	10.4	3	12.2	2	9.8	2	9.8	3	12.2	3	14	23	9
Q9BUF5	TUBB6	Tubulin beta-6 chain	5	4.4	5	4.2	5	5.6	5	6.6	5	6.8	5	6.2	5	6.6	5	5.4	5	7.6	45	9
K7EPQ0	TUBD1	Tubulin delta chain (Fragment)	0	0	0	0	0	0	0	0	1	0.2	0	0	0	0	0	0	0	0	1	1
P49411	TUFM	Elongation factor Tu, mitochondrial	5	4.8	5	3	5	3.8	5	5	4	2.6	5	5.4	5	3.4	5	3.2	5	5.6	44	9
P10599	TXN	Thioredoxin	0	0	0	0	1	0.4	0	0	1	0.4	1	0.2	0	0	1	0.4	0	0	4	4
Q99757	TXN2	Thioredoxin, mitochondrial	0	0	0	0	0	0	0	0	0	0	1	0.4	0	0	0	0	0	0	1	1
Q8NBS9	TXNDC5	Thioredoxin domain-containing protein 5	5	10.8	5	6.4	5	5.6	5	8.4	5	7.8	5	7	5	10.6	5	6.8	5	7.8	45	9
Q16881	TXNRD1	Thioredoxin reductase 1, cytoplasmic	4	1.6	4	1.2	2	1.2	5	2	4	1.2	3	2.2	3	1	4	1.4	5	2.6	34	9
Q6NUM6	TYW1B	S-adenosyl-L-methionine-dependent tRNA 4-demethylwyosine synthase TYW1B	0	0	0	0	1	0.2	0	0	0	0	0	0	0	0	0	0	0	0	1	1
Q9BZF9	UACA	Uveal autoantigen with coiled-coil domains and ankyrin repeats	2	0.8	3	1.6	2	0.8	3	1.2	1	0.4	2	0.8	1	0.8	5	2.4	2	0.8	21	9
P22314	UBA1	Ubiquitin-like modifier-activating enzyme 1	5	4.6	4	4	5	4.4	3	2.4	3	2.4	4	1.8	4	3.6	3	1.2	4	2	35	9
Q9UBT2	UBA2	SUMO-activating enzyme subunit 2	0	0	0	0	0	0	0	0	0	0	0	0	0	0	1	0.4	0	0	1	1
Q5VU80	UBAP2L	Ubiquitin-associated protein 2-like (Fragment)	0	0	0	0	0	0	0	0	0	0	0	0	1	0.2	0	0	0	0	1	1
A0A0U1RRC9	UBASH3A	Ubiquitin-associated and SH3 domain-containing protein A	0	0	1	0.2	0	0	0	0	0	0	0	0	0	0	0	0	0	0	1	1
F8WCT3	UBE2F	NEDD8-conjugating enzyme UBE2F	0	0	1	0.2	0	0	0	0	0	0	0	0	0	0	0	0	0	0	1	1
H3BUI7	UBE2F-SCLY	UBE2F-SCLY readthrough (NMD candidate)	0	0	0	0	1	0.2	0	0	0	0	0	0	0	0	0	0	0	0	1	1
Q5JXB2	UBE2NL	Putative ubiquitin-conjugating enzyme E2 N-like	1	0.2	1	0.2	1	0.2	2	0.6	0	0	1	0.2	0	0	1	0.2	1	0.2	8	7
Q7Z3V4	UBE3B	Ubiquitin-protein ligase E3B	0	0	1	0.2	0	0	0	0	0	0	0	0	0	0	0	0	1	0.4	2	2
O95155	UBE4B	Ubiquitin conjugation factor E4 B	0	0	0	0	1	0.2	0	0	0	0	0	0	0	0	0	0	0	0	1	1
Q8IWV7	UBR1	E3 ubiquitin-protein ligase UBR1	0	0	0	0	0	0	1	0.2	0	0	0	0	0	0	0	0	0	0	1	1
Q5T4S7	UBR4	E3 ubiquitin-protein ligase UBR4	0	0	0	0	0	0	1	0.2	0	0	0	0	1	0.2	0	0	0	0	2	2
D6R956	UCHL1	Ubiquitin carboxyl-terminal hydrolase	0	0	3	0.6	0	0	0	0	3	0.6	0	0	1	0.2	2	0.4	0	0	9	4
P15374	UCHL3	Ubiquitin carboxyl-terminal hydrolase isozyme L3	0	0	0	0	0	0	2	0.4	0	0	0	0	0	0	0	0	0	0	2	1
P55851	UCP2	Mitochondrial uncoupling protein 2	0	0	0	0	0	0	0	0	1	0.2	0	0	0	0	0	0	0	0	1	1
O60701	UGDH	UDP-glucose 6-dehydrogenase	0	0	0	0	0	0	1	0.2	0	0	0	0	0	0	0	0	0	0	1	1
Q9NYU2	UGGT1	UDP-glucose:glycoprotein glucosyltransferase 1	0	0	0	0	1	0.4	1	0.2	0	0	0	0	1	0.2	1	0.2	0	0	4	4
Q96PU4	UHRF2	E3 ubiquitin-protein ligase UHRF2	0	0	0	0	0	0	0	0	1	0.2	0	0	0	0	0	0	0	0	1	1
Q8N2C9	UMODL1-AS1	Uncharacterized protein UMODL1-AS1	0	0	0	0	0	0	0	0	0	0	0	0	0	0	0	0	1	0.2	1	1
A0A1B0GUS7	UNC13B	Protein unc-13 homolog B	0	0	0	0	0	0	2	0.4	0	0	0	0	0	0	0	0	0	0	2	1
A0A1W2PNX8	UNC45A	Protein unc-45 homolog A	0	0	0	0	0	0	1	0.2	1	0.2	0	0	0	0	0	0	0	0	2	2
Q9UBR1	UPB1	Beta-ureidopropionase	0	0	0	0	0	0	0	0	0	0	0	0	0	0	1	0.2	0	0	1	1
Q9HAU5	UPF2	Regulator of nonsense transcripts 2	0	0	0	0	0	0	1	0.2	0	0	0	0	0	0	0	0	0	0	1	1
O60287	URB1	Nucleolar pre-ribosomal-associated protein 1	0	0	0	0	0	0	0	0	0	0	0	0	0	0	0	0	1	0.2	1	1
A0A087WZB7	UROS	Uroporphyrinogen-III synthase (Fragment)	0	0	0	0	0	0	0	0	0	0	0	0	1	0.2	0	0	0	0	1	1
A6NCW0	USP17L3	Ubiquitin carboxyl-terminal hydrolase 17-like protein 3	0	0	0	0	0	0	0	0	0	0	0	0	0	0	1	0.2	0	0	1	1
Q9UPU5	USP24	Ubiquitin carboxyl-terminal hydrolase 24	0	0	0	0	0	0	0	0	0	0	0	0	1	0.2	0	0	1	0.2	2	2
A0A087WXV9	USP31	Ubiquitin carboxyl-terminal hydrolase 31 (Fragment)	0	0	0	0	1	0.2	0	0	0	0	0	0	0	0	0	0	0	0	1	1
E9PRM2	USP35	Ubiquitin carboxyl-terminal hydrolase 35 (Fragment)	0	0	1	0.2	0	0	0	0	0	0	0	0	0	0	0	0	0	0	1	1
Q70EK8	USP53	Inactive ubiquitin carboxyl-terminal hydrolase 53	0	0	0	0	0	0	0	0	0	0	0	0	1	0.2	0	0	0	0	1	1
O00507	USP9Y	Probable ubiquitin carboxyl-terminal hydrolase FAF-Y	0	0	0	0	0	0	0	0	0	0	0	0	1	0.2	0	0	0	0	1	1
O75691	UTP20	Small subunit processome component 20 homolog	0	0	0	0	0	0	0	0	0	0	0	0	1	0.2	0	0	0	0	1	1
F5GWV3	UTY	Histone demethylase UTY	0	0	0	0	0	0	0	0	0	0	0	0	0	0	1	0.2	0	0	1	1
Q9P0L0	VAPA	Vesicle-associated membrane protein-associated protein A	0	0	1	0.4	0	0	0	0	0	0	0	0	0	0	0	0	1	0.2	2	2
P26640	VARS1	Valine--tRNA ligase	0	0	0	0	0	0	0	0	0	0	0	0	0	0	1	0.4	0	0	1	1
P50552	VASP	Vasodilator-stimulated phosphoprotein	3	0.8	1	0.2	1	0.2	0	0	3	0.8	1	0.2	1	0.2	1	0.2	2	0.6	13	8
Q99536	VAT1	Synaptic vesicle membrane protein VAT-1 homolog	1	0.4	2	0.8	0	0	1	0.2	1	0.2	1	0.4	0	0	0	0	2	0.6	8	6
Q9UKW4	VAV3	Guanine nucleotide exchange factor VAV3	0	0	1	0.2	1	0.2	0	0	0	0	0	0	0	0	0	0	0	0	2	2
P13611	VCAN	Versican core protein	0	0	0	0	1	0.2	0	0	0	0	0	0	0	0	0	0	0	0	1	1
P18206	VCL	Vinculin	2	1.6	5	2.4	4	1.2	5	2.6	5	3	4	1.6	4	1.8	4	1.8	4	1.8	37	9
P55072	VCP	Transitional endoplasmic reticulum ATPase	5	12	5	6.6	5	6.2	5	11.8	5	9.4	4	6.6	5	8.4	5	4	5	6.2	44	9
P21796	VDAC1	Voltage-dependent anion-selective channel protein 1	3	1.4	2	0.8	3	1.2	3	1.2	1	0.2	3	1.6	1	0.4	0	0	1	0.2	17	8
P45880	VDAC2	Voltage-dependent anion-selective channel protein 2	1	0.4	3	1.2	2	0.8	3	1.2	2	0.8	1	0.4	2	1.4	1	0.4	3	1	18	9
Q9Y277	VDAC3	Voltage-dependent anion-selective channel protein 3	1	0.2	0	0	0	0	0	0	1	0.2	0	0	0	0	0	0	1	0.2	3	3
O43915	VEGFD	Vascular endothelial growth factor D	0	0	0	0	0	0	0	0	0	0	2	0.4	0	0	0	0	0	0	2	1
P0C5K6	VENTXP1	Putative tumor antigen NA88-A	0	0	0	0	0	0	0	0	0	0	1	0.2	0	0	0	0	0	0	1	1
P08670	VIM	Vimentin	5	107.2	5	115	5	109.8	5	112.4	5	102.4	5	90.6	5	109.8	5	106.2	5	114	45	9
P32241	VIPR1	Vasoactive intestinal polypeptide receptor 1	3	0.6	4	1	3	0.8	3	0.8	3	0.8	4	1	2	0.4	3	0.8	2	0.6	27	9
E9PL76	VNN2	Vascular non-inflammatory molecule 2 (Fragment)	0	0	0	0	1	0.2	0	0	0	0	0	0	0	0	0	0	0	0	1	1
Q7Z7G8	VPS13B	Vacuolar protein sorting-associated protein 13B	0	0	0	0	0	0	0	0	0	0	0	0	0	0	1	0.2	0	0	1	1
Q709C8	VPS13C	Vacuolar protein sorting-associated protein 13C	0	0	0	0	0	0	0	0	0	0	0	0	0	0	1	0.2	0	0	1	1
A0A2R8YF01	VPS45	Vacuolar protein sorting-associated protein 45	1	0.2	1	0.2	1	0.4	0	0	1	0.2	1	0.2	0	0	0	0	1	0.4	6	6
C9JJN9	VPS8	Vacuolar protein sorting-associated protein 8 homolog	0	0	0	0	1	0.2	0	0	0	0	0	0	0	0	0	0	0	0	1	1
Q86Y07	VRK2	Serine/threonine-protein kinase VRK2	0	0	0	0	0	0	1	0.2	0	0	0	0	0	0	0	0	0	0	1	1
Q5TIE3	VWA5B1	von Willebrand factor A domain-containing protein 5B1	1	0.2	0	0	0	0	0	0	0	0	0	0	0	0	0	0	0	0	1	1
B2RUY7	VWC2L	von Willebrand factor C domain-containing protein 2-like	0	0	0	0	1	0.2	0	0	0	0	0	0	0	0	0	0	0	0	1	1
P04275	VWF	von Willebrand factor	5	8	5	14.6	5	13.4	4	1.6	5	13	5	8.4	5	4.2	5	13	5	13.8	44	9
P23381	WARS1	Tryptophan--tRNA ligase, cytoplasmic	0	0	0	0	3	1	0	0	1	0.4	5	5.8	0	0	0	0	3	1.4	12	4
Q6ZS81	WDFY4	WD repeat- and FYVE domain-containing protein 4	1	0.2	0	0	0	0	0	0	0	0	0	0	0	0	0	0	0	0	1	1
O75083	WDR1	WD repeat-containing protein 1	5	4.8	4	5.4	5	6.8	5	4.4	5	6	5	9.6	5	6.4	5	8.6	5	8.2	44	9
A0A088AWN2	WDR20	WD repeat-containing protein 20	0	0	0	0	2	0.4	0	0	2	0.8	0	0	0	0	1	0.4	0	0	5	3
A0A087X295	WDR6	WD repeat-containing protein 6	0	0	0	0	0	0	1	0.2	0	0	0	0	0	0	0	0	0	0	1	1
Q9GZS3	WDR61	WD repeat-containing protein 61	0	0	0	0	1	0.4	1	0.4	1	0.4	0	0	0	0	0	0	0	0	3	3
Q8IWA0	WDR75	WD repeat-containing protein 75	0	0	0	0	0	0	0	0	0	0	0	0	0	0	1	0.2	0	0	1	1
Q9BQA1	WDR77	Methylosome protein 50	0	0	1	0.2	2	0.4	0	0	0	0	1	0.2	0	0	0	0	0	0	4	3
Q8TF74	WIPF2	WAS/WASL-interacting protein family member 2	0	0	0	0	0	0	0	0	0	0	0	0	0	0	1	0.2	0	0	1	1
A8K0G1	WNT7B	Protein Wnt	1	0.2	0	0	0	0	0	0	0	0	0	0	0	0	0	0	0	0	1	1
Q9H1J5	WNT8A	Protein Wnt-8a	0	0	0	0	0	0	0	0	0	0	1	0.2	0	0	0	0	1	0.2	2	2
Q658N2	WSCD1	WSC domain-containing protein 1	1	0.2	0	0	0	0	0	0	0	0	0	0	0	0	0	0	0	0	1	1
Q9NZC7	WWOX	WW domain-containing oxidoreductase	0	0	0	0	0	0	1	0.2	0	0	0	0	0	0	0	0	0	0	1	1
Q5GH72	XKR7	XK-related protein 7	0	0	0	0	0	0	0	0	1	0.2	0	0	0	0	0	0	0	0	1	1
Q5T6H2	XPNPEP1	Xaa-Pro aminopeptidase 1 (Fragment)	0	0	1	0.2	0	0	0	0	0	0	0	0	0	0	0	0	0	0	1	1
O14980	XPO1	Exportin-1	0	0	0	0	1	0.2	0	0	1	0.4	0	0	0	0	1	0.4	0	0	3	3
P13010	XRCC5	X-ray repair cross-complementing protein 5	4	2.8	5	4	4	4.4	4	4.4	5	4.2	3	2.2	5	3	5	4	5	3.4	40	9
P12956	XRCC6	X-ray repair cross-complementing protein 6	5	5	5	7.4	5	5.2	5	7.2	5	5.4	5	7.2	5	8.2	5	4.8	5	6.4	45	9
Q9H0D6	XRN2	5'-3' exoribonuclease 2	0	0	0	0	0	0	0	0	0	0	1	0.2	0	0	0	0	0	0	1	1
P67809	YBX1	Y-box-binding protein 1	5	4	5	5.6	5	6	5	5.2	5	5.2	5	5.6	5	3.6	5	5.2	5	6	45	9
J3QRU1	YES1	Tyrosine-protein kinase	0	0	0	0	1	0.4	0	0	0	0	0	0	0	0	0	0	0	0	1	1
E7ENQ6	YJEFN3	YjeF N-terminal domain-containing protein	0	0	0	0	0	0	0	0	1	0.2	0	0	0	0	0	0	0	0	1	1
P31946	YWHAB	14-3-3 protein beta/alpha	4	2.8	4	2	5	4.4	5	8.4	5	3.8	5	5	4	3.4	5	6.6	5	4.6	42	9
P62258	YWHAE	14-3-3 protein epsilon	3	3.6	4	4	5	5.2	4	3.2	5	4.6	5	7.8	5	5.8	5	4.6	5	5.4	41	9
P61981	YWHAG	14-3-3 protein gamma	3	2.2	5	4.6	3	2.6	5	6.2	5	6	5	7.4	5	2.8	5	5.4	5	7.8	41	9
Q04917	YWHAH	14-3-3 protein eta	2	0.4	0	0	2	0.4	4	0.8	3	0.6	1	0.2	0	0	0	0	0	0	12	5
P27348	YWHAQ	14-3-3 protein theta	5	4.6	5	5.6	5	6.4	5	3.2	5	4.8	5	6.4	5	6	5	4.2	5	5.4	45	9
P63104	YWHAZ	14-3-3 protein zeta/delta	5	15.6	5	15.2	5	17.4	5	21.8	5	19	5	18.4	5	20.4	5	19.2	5	18.4	45	9
Q86SH2	ZAR1	Zygote arrest protein 1	0	0	0	0	0	0	0	0	0	0	0	0	0	0	1	0.2	0	0	1	1
P86452	ZBED6	Zinc finger BED domain-containing protein 6	0	0	0	0	0	0	1	0.2	0	0	0	0	0	0	0	0	0	0	1	1
Q9ULJ3	ZBTB21	Zinc finger and BTB domain-containing protein 21	0	0	0	0	0	0	0	0	0	0	1	0.2	0	0	0	0	0	0	1	1
Q9NUA8	ZBTB40	Zinc finger and BTB domain-containing protein 40	1	0.2	0	0	0	0	0	0	0	0	0	0	0	0	0	0	1	0.2	2	2
Q5SVQ8	ZBTB41	Zinc finger and BTB domain-containing protein 41	0	0	0	0	0	0	0	0	0	0	0	0	0	0	0	0	1	0.2	1	1
Q86UZ6	ZBTB46	Zinc finger and BTB domain-containing protein 46	1	0.2	0	0	0	0	0	0	0	0	0	0	0	0	0	0	0	0	1	1
Q6PJT7	ZC3H14	Zinc finger CCCH domain-containing protein 14	1	0.2	0	0	0	0	0	0	0	0	0	0	0	0	0	0	0	0	1	1
Q9UGR2	ZC3H7B	Zinc finger CCCH domain-containing protein 7B	0	0	0	0	1	0.2	0	0	0	0	0	0	0	0	0	0	0	0	1	1
A0A1W2PRJ8	ZDHHC23	Palmitoyltransferase (Fragment)	0	0	0	0	0	0	0	0	1	0.2	0	0	0	0	0	0	0	0	1	1
Q9H6R6	ZDHHC6	Palmitoyltransferase ZDHHC6	0	0	1	0.2	0	0	0	0	0	0	0	0	0	0	0	0	0	0	1	1
H7C491	ZFAND2B	AN1-type zinc finger protein 2B (Fragment)	1	0.2	0	0	1	0.2	1	0.2	0	0	0	0	1	0.2	0	0	0	0	4	4
H0YK21	ZFAND6	AN1-type zinc finger protein 6 (Fragment)	0	0	1	0.2	0	0	0	0	0	0	0	0	0	0	0	0	0	0	1	1
Q8NB50	ZFP62	Zinc finger protein 62 homolog	0	0	0	0	0	0	0	0	0	0	0	0	0	0	0	0	1	0.2	1	1
E9PJ47	ZFPL1	Zinc finger protein-like 1	0	0	0	0	0	0	1	0.2	0	0	0	0	0	0	0	0	0	0	1	1
H7BZE7	ZKSCAN7	Zinc finger protein with KRAB and SCAN domains 7 (Fragment)	1	0.2	0	0	0	0	0	0	0	0	0	0	0	0	0	0	0	0	1	1
A0A087X127	ZMIZ2	Zinc finger MIZ domain-containing protein 2	0	0	0	0	0	0	0	0	1	0.2	0	0	0	0	0	0	0	0	1	1
Q9ULU4	ZMYND8	Protein kinase C-binding protein 1	0	0	0	0	0	0	0	0	0	0	0	0	0	0	1	0.2	0	0	1	1
P51786	ZNF157	Zinc finger protein 157	0	0	0	0	0	0	1	0.2	0	0	0	0	0	0	0	0	0	0	1	1
Q9HCG1	ZNF160	Zinc finger protein 160	0	0	0	0	0	0	1	0.2	0	0	0	0	0	0	0	0	0	0	1	1
A0A0A0MTK1	ZNF211	Zinc finger protein 211	0	0	0	0	1	0.2	0	0	0	0	0	0	0	0	0	0	0	0	1	1
P59817	ZNF280A	Zinc finger protein 280A	0	0	0	0	0	0	1	0.2	0	0	0	0	0	0	0	0	0	0	1	1
Q9Y2X9	ZNF281	Zinc finger protein 281	1	0.2	0	0	0	0	0	0	0	0	0	0	0	0	0	0	0	0	1	1
Q9UDV7	ZNF282	Zinc finger protein 282	0	0	0	0	0	0	0	0	0	0	0	0	0	0	1	0.2	0	0	1	1
Q9HBT7	ZNF287	Zinc finger protein 287	0	0	0	0	1	0.2	0	0	0	0	0	0	0	0	0	0	1	0.2	2	2
P17036	ZNF3	Zinc finger protein 3	0	0	0	0	0	0	0	0	0	0	0	0	0	0	0	0	1	0.2	1	1
A0A0A0MS50	ZNF300	Zinc finger protein 300	0	0	0	0	0	0	1	0.2	0	0	0	0	0	0	0	0	0	0	1	1
C9J6X6	ZNF385C	Zinc finger protein 385C	0	0	1	0.2	0	0	0	0	0	0	0	0	0	0	0	0	0	0	1	1
Q96N95	ZNF396	Zinc finger protein 396	1	0.2	0	0	0	0	0	0	0	0	0	0	0	0	0	0	0	0	1	1
P51814	ZNF41	Zinc finger protein 41	0	0	0	0	0	0	0	0	0	0	1	0.2	0	0	0	0	0	0	1	1
Q8N7K0	ZNF433	Zinc finger protein 433	1	0.2	0	0	0	0	0	0	0	0	0	0	0	0	0	0	0	0	1	1
P15621	ZNF44	Zinc finger protein 44	0	0	0	0	0	0	0	0	0	0	0	0	1	0.2	0	0	0	0	1	1
Q9BX82	ZNF471	Zinc finger protein 471	0	0	1	0.2	0	0	0	0	0	0	0	0	0	0	0	0	0	0	1	1
Q9ULM2	ZNF490	Zinc finger protein 490	0	0	0	0	0	0	0	0	0	0	0	0	0	0	1	0.2	0	0	1	1
B9EGE7	ZNF507	ZNF507 protein	0	0	0	0	1	0.2	0	0	0	0	0	0	0	0	0	0	0	0	1	1
Q96ME7	ZNF512	Zinc finger protein 512	0	0	0	0	0	0	0	0	0	0	0	0	1	0.2	0	0	0	0	1	1
Q8N8E2	ZNF513	Zinc finger protein 513	0	0	1	0.2	0	0	0	0	0	0	0	0	1	0.2	0	0	0	0	2	2
Q3MIS6	ZNF528	Zinc finger protein 528	0	0	0	0	0	0	0	0	0	0	0	0	0	0	1	0.2	0	0	1	1
O15090	ZNF536	Zinc finger protein 536	1	0.2	0	0	0	0	0	0	0	0	0	0	0	0	0	0	0	0	1	1
Q7Z340	ZNF551	Zinc finger protein 551	0	0	0	0	0	0	0	0	0	0	0	0	1	0.2	0	0	0	0	1	1
S4R3H7	ZNF559-ZNF177	ZNF559-ZNF177 readthrough	0	0	0	0	1	0.2	0	0	1	0.2	0	0	0	0	0	0	0	0	2	2
Q96MR9	ZNF560	Zinc finger protein 560	0	0	0	0	0	0	0	0	0	0	0	0	1	0.2	0	0	0	0	1	1
Q6V9R5	ZNF562	Zinc finger protein 562	0	0	0	0	0	0	1	0.2	0	0	0	0	0	0	0	0	0	0	1	1
Q96N58	ZNF578	Zinc finger protein 578	1	0.2	0	0	0	0	0	0	0	0	0	0	0	0	0	0	0	0	1	1
Q8NAF0	ZNF579	Zinc finger protein 579	0	0	0	0	0	0	0	0	0	0	0	0	0	0	0	0	1	0.2	1	1
Q8IYB9	ZNF595	Zinc finger protein 595	0	0	1	0.2	0	0	0	0	0	0	0	0	0	0	0	0	0	0	1	1
Q9ULD9	ZNF608	Zinc finger protein 608	0	0	0	0	0	0	0	0	0	0	0	0	0	0	1	0.2	0	0	1	1
A0A087X254	ZNF615	Zinc finger protein 615	0	0	0	0	0	0	0	0	0	0	0	0	1	0.2	0	0	1	0.2	2	2
Q6ZSS3	ZNF621	Zinc finger protein 621	0	0	0	0	0	0	0	0	0	0	1	0.2	0	0	0	0	0	0	1	1
Q969S3	ZNF622	Zinc finger protein 622	0	0	0	0	0	0	0	0	0	0	0	0	0	0	1	0.2	1	0.2	2	2
A0A087X1I5	ZNF626	Zinc finger protein 626	0	0	0	0	0	0	0	0	0	0	0	0	0	0	1	0.2	0	0	1	1
Q9H582	ZNF644	Zinc finger protein 644	0	0	0	0	0	0	2	0.4	0	0	0	0	0	0	0	0	1	0.2	3	2
K7EL79	ZNF653	Zinc finger protein 653 (Fragment)	0	0	0	0	0	0	0	0	0	0	0	0	0	0	0	0	1	0.2	1	1
Q6ZS27	ZNF662	Zinc finger protein 662	0	0	0	0	0	0	0	0	0	0	0	0	0	0	1	0.2	0	0	1	1
Q96K58	ZNF668	Zinc finger protein 668	0	0	0	0	0	0	0	0	0	0	0	0	0	0	1	0.2	0	0	1	1
Q2M3X9	ZNF674	Zinc finger protein 674	0	0	0	0	0	0	1	0.2	0	0	0	0	0	0	0	0	0	0	1	1
Q86XU0	ZNF677	Zinc finger protein 677	0	0	0	0	0	0	0	0	1	0.2	0	0	0	0	1	0.4	0	0	2	2
Q8NEM1	ZNF680	Zinc finger protein 680	1	0.2	0	0	0	0	0	0	0	0	1	0.2	0	0	0	0	0	0	2	2
B9EG95	ZNF682	ZNF682 protein	0	0	0	0	0	0	0	0	0	0	1	0.2	0	0	0	0	0	0	1	1
Q8N1G0	ZNF687	Zinc finger protein 687	0	0	0	0	0	0	1	0.2	2	0.6	0	0	0	0	0	0	0	0	3	2
Q8IW36	ZNF695	Zinc finger protein 695	0	0	0	0	0	0	0	0	0	0	0	0	0	0	0	0	1	0.2	1	1
Q9Y462	ZNF711	Zinc finger protein 711	0	0	1	0.2	0	0	0	0	0	0	0	0	0	0	0	0	0	0	1	1
Q6ZMV8	ZNF730	Putative zinc finger protein 730	1	0.2	0	0	0	0	0	0	0	0	0	0	1	0.2	0	0	0	0	2	2
A0A2R8YDQ5	ZNF746	Zinc finger protein 746	0	0	0	0	1	0.2	0	0	0	0	0	0	0	0	0	0	0	0	1	1
P36508	ZNF76	Zinc finger protein 76	0	0	0	0	0	0	0	0	1	0.2	0	0	0	0	0	0	0	0	1	1
M0QYQ0	ZNF791	Zinc finger protein 791	0	0	0	0	0	0	0	0	0	0	0	0	1	0.2	0	0	0	0	1	1
K7EL37	ZNF793	Zinc finger protein 793 (Fragment)	1	0.2	0	0	0	0	0	0	0	0	0	0	0	0	0	0	0	0	1	1
P17098	ZNF8	Zinc finger protein 8	0	0	0	0	0	0	0	0	0	0	1	0.2	0	0	0	0	0	0	1	1
A4D1E1	ZNF804B	Zinc finger protein 804B	0	0	0	0	0	0	0	0	0	0	1	0.2	0	0	0	0	0	0	1	1
P0C7X5	ZNF806	Zinc finger protein 806	0	0	0	0	0	0	0	0	0	0	0	0	1	0.2	0	0	0	0	1	1
H0Y9M2	ZNF827	Zinc finger protein 827	0	0	1	0.4	0	0	0	0	0	0	0	0	1	0.2	0	0	0	0	2	2
F5H0T0	ZNF84	Zinc finger protein 84 (Fragment)	0	0	0	0	0	0	0	0	1	0.2	0	0	0	0	0	0	0	0	1	1
Q08AG5	ZNF844	Zinc finger protein 844	0	0	0	0	0	0	0	0	0	0	0	0	0	0	0	0	1	0.2	1	1
O60290	ZNF862	Zinc finger protein 862	0	0	1	0.2	1	0.2	0	0	0	0	0	0	0	0	0	0	0	0	2	2
P0CJ78	ZNF865	Zinc finger protein 865	0	0	0	0	0	0	0	0	0	0	0	0	1	0.2	0	0	0	0	1	1
P10072	ZNF875	Zinc finger protein 875	0	0	0	0	1	0.2	0	0	0	0	0	0	0	0	0	0	0	0	1	1
K7EPG7	ZNF93	Zinc finger protein 93	0	0	1	0.2	0	0	0	0	0	0	0	0	0	0	0	0	0	0	1	1
Q12836	ZP4	Zona pellucida sperm-binding protein 4	0	0	0	0	0	0	0	0	0	0	1	0.2	0	0	0	0	0	0	1	1
Q9UGI0	ZRANB1	Ubiquitin thioesterase ZRANB1	1	0.2	0	0	0	0	0	0	0	0	0	0	0	0	0	0	0	0	1	1
I3L1J3	ZSCAN10	Zinc finger and SCAN domain-containing protein 10	0	0	0	0	0	0	0	0	1	0.2	0	0	0	0	0	0	0	0	1	1
M0R3C6	ZSCAN18	Zinc finger and SCAN domain-containing protein 18 (Fragment)	0	0	0	0	0	0	0	0	1	0.2	0	0	0	0	0	0	0	0	1	1
P17040	ZSCAN20	Zinc finger and SCAN domain-containing protein 20	0	0	0	0	0	0	0	0	1	0.2	0	0	0	0	0	0	0	0	1	1
Q15942	ZYX	Zyxin	5	8.4	5	10.4	5	8.4	5	10	5	9.6	5	11.6	5	8	5	7.4	5	8.2	45	9
