# Supplementary material for: SARS-CoV-2 Infection Remodels the Phenotype and Promotes Angiogenesis of Primary Human Lung Endothelial Cells
Source: Microorganisms. 2021 Jul 3;9(7):1438. doi: 10.3390/microorganisms9071438 (PMC8305478; doi:10.3390/microorganisms9071438)
Supplement: Supplementary file 1 [file microorganisms-09-01438-s001.zip › Table S2 .xlsx]

## Sheet: Table S2
Uniprot Accession	Gene name	Reference	aPSM									LDA		MAProMa
			Mock			SARS-CoV-2			UV-SARS-CoV-2					day 1						day 2						day 3
			day 1	day 2	day 3	day 1	day 2	day 3	day 1	day 2	day 3	F ratio	Prob	SARS-CoV-2 vs Mock		UV-SARS-CoV-2 vs Mock		SARS-CoV-2 vs UV-SARS-CoV-2		SARS-CoV-2 vs Mock		UV-SARS-CoV-2 vs Mock		SARS-CoV-2 vs UV-SARS-CoV-2		SARS-CoV-2 vs Mock		UV-SARS-CoV-2 vs Mock		SARS-CoV-2 vs UV-SARS-CoV-2
P07355	ANXA2	Annexin A2	22.8	32.8	34.2	34.4	38.8	33	32.6	38.4	43.2	2.25239	0.0467056	0.405594	331.76	0.353791	271.46	0.0537313	60.3	0.167598	214.8	0.157303	199.36	0.0103627	15.44	-0.0357143	-40.32	0.232558	348.3	-0.267717	-388.62
P25705	ATP5F1A	ATP synthase subunit alpha, mitochondrial	11.8	8.2	10.6	9.8	10.6	11.2	8	8.6	10.4			-0.185185	-21.6	-0.383838	-37.62	0.202247	16.02	0.255319	22.56	0.047619	3.36	0.208333	19.2	0.0550459	6.54	-0.0190476	-2.1	0.0740741	8.64
P06576	ATP5F1B	ATP synthase subunit beta, mitochondrial	9	6.4	8.4	9.6	9.4	8.8	9	8.4	7			0.0645161	5.58	0	0	0.0645161	5.58	0.379747	23.7	0.27027	14.8	0.11236	8.9	0.0465116	3.44	-0.181818	-10.78	0.227848	14.22
Q9Y696	CLIC4	Chloride intracellular channel protein 4	1.4	2.8	5.2	3.8	4.8	4	4.6	3.4	3	2.70845	0.0196302	0.923077	6.24	1.06667	9.6	-0.190476	-3.36	0.526316	7.6	0.193548	1.86	0.341463	5.74	-0.26087	-5.52	-0.536585	-9.02	0.285714	3.5
P02462	COL4A1	Collagen alpha-1(IV) chain	0.6	3	4.4	1	2.4	4	0.2	1.8	3.6	5.42346	0.00017771	0.5	0.32	-1	-0.16			-0.222222	-1.62	-0.5	-2.88			-0.0952381	-1.68	-0.2	-3.2
P08572	COL4A2	Collagen alpha-2(IV) chain	1	3.6	6.4	0.2	4.4	5	0	4.2	5.2	12.5083	2.89362e-08	-1.33333	-0.48	-2	-0.5	2	0.02	0.2	3.2	0.153846	2.34	0.0465116	0.86	-0.245614	-7.98	-0.206897	-6.96	-0.0392157	-1.02
P35221	CTNNA1	Catenin alpha-1	5	5.8	5.6	3.8	6	4.4	2.4	4.8	4.6			-0.272727	-5.28	-0.702703	-9.62	0.451613	4.34	0.0338983	1.18	-0.188679	-5.3	0.222222	6.48	-0.24	-6	-0.196078	-5.1	-0.0444444	-0.9
A0A2R8Y5A3	CTNNB1	Catenin beta-1	0	0	0	0.2	0	0	0	0.6	0.2	2.54972	0.026512	2	0.02	0	0			0	0	2	0.18			0	0	2	0.02
P21333	FLNA	Filamin-A	42.8	39.6	52.2	43.4	42.4	45.8	42.6	37.4	47.4	2.63424	0.0225869	0.0139211	25.86	-0.00468384	-8.54			0.0682927	114.8	-0.0571429	-84.7			-0.130612	-313.6	-0.0963855	-239.04
A0A2U3TZU2	GPI	Glucose-6-phosphate isomerase	1.6	1.2	2.4	1.6	1.4	4.2	1.6	1.2	3.8			0	0	0	0	0	0	0.153846	0.26	0	0	0.153846	0.26	0.545455	5.94	0.451613	4.34	0.1	1.6
P04792	HSPB1	Heat shock protein beta-1	7.2	7.6	7.2	5.4	6.6	5.6	5.8	9.4	8.4			-0.285714	-11.34	-0.215385	-9.1	-0.0714286	-2.24	-0.140845	-7.1	0.211765	15.3	-0.35	-22.4	-0.25	-10.24	0.153846	9.36	-0.4	-19.6
P08648	ITGA5	Integrin alpha-5	0	0	0	0.2	0	0.2	0.8	0.2	0	2.26016	0.046018	2	0.02	2	0.32			0	0	2	0.02			2	0.02	0	0
P43121	MCAM	Cell surface glycoprotein MUC18	0.6	0.6	2	0	0.2	0.8	0	0	0.8	2.37064	0.0372745	-2	-0.18	-2	-0.18			-1	-0.16	-2	-0.18			-0.857143	-1.68	-0.857143	-1.68
P35579	MYH9	Myosin-9	101.8	96	105	98.8	96.6	106.8	98.6	104	117.2	2.66468	0.0213229	-0.0299103	-300.9	-0.0319361	-320.64			0.00623053	57.78	0.08	800			0.0169972	190.62	0.109811	1355.42
P19338	NCL	Nucleolin	9.2	6.8	6	5.4	4.8	6	6.4	4.2	5.6	2.81406	0.0160894	-0.520548	-27.74	-0.358974	-21.84	-0.169492	-5.9	-0.344828	-11.6	-0.472727	-14.3	0.133333	2.7	0	0	-0.0689655	-2.32	0.0689655	2.32
P47900	P2RY1	P2Y purinoceptor 1	0	0	0	0	0.4	0	0	0	0	2.58523	0.0247846	0	0	0	0			2	0.08	0	0			0	0	0	0
P00558	PGK1	Phosphoglycerate kinase 1	7.2	8.4	4.8	4.4	6.6	8.2	7.2	6.4	5.4			-0.482759	-16.24	0	0	-0.482759	-16.24	-0.24	-13.5	-0.27027	-14.8	0.0307692	1.3	0.523077	22.1	0.117647	3.06	0.411765	19.04
P14618	PKM	Pyruvate kinase PKM	20.6	14.4	23.8	22.6	24.4	25	21.4	19	26.8	3.88341	0.00229171	0.0925926	43.2	0.0380952	16.8	0.0545455	26.4	0.515464	194	0.275449	76.82	0.248848	117.18	0.0491803	29.28	0.118577	75.9	-0.0694981	-46.62
Q9NQC3	RTN4	Reticulon-4	12	11	10.4	8.8	10	10.8	10.8	10.4	12.4			-0.307692	-33.28	-0.105263	-13.68	-0.204082	-19.6	-0.0952381	-10.5	-0.0560748	-6.42	-0.0392157	-4.08	0.0377358	4.24	0.175439	22.8	-0.137931	-18.56
O43915	VEGFD	Vascular endothelial growth factor D	0	0	0	0	0	0.4	0	0	0	2.58523	0.0247846	0	0	0	0			0	0	0	0			2	0.08	0	0
P23381	WARS1	Tryptophan--tRNA ligase, cytoplasmic	0	0	1	0	0.4	5.8	0	0	1.4	29.2583	2.62099e-13	0	0	0	0	0	0	2	0.08	0	0	2	0.08	1.41176	16.32	0.333333	0.48	1.22222	15.84
P63104	YWHAZ	14-3-3 protein zeta/delta	15.6	15.2	17.4	21.8	19	18.4	20.4	19.2	18.4			0.331551	115.94	0.266667	86.4	0.0663507	29.54	0.222222	64.98	0.232558	68.8	-0.0104712	-3.82	0.0558659	17.9	0.0558659	17.9	0	0
P04264	KRT1	Keratin, type II cytoskeletal 1	0.8	0	0	0	0	0	0	0	0	3.97727	0.00194409	-2	-0.32	-2	-0.32			0	0	0	0			0	0	0	0
P14625	HSP90B1	Endoplasmin	9.2	9.8	10.8	11.6	11.4	14.6	9.8	10.6	10.4			0.230769	24.96	0.0631579	5.7	0.168224	19.26	0.150943	16.96	0.0784314	8.16	0.0727273	8.8	0.299213	48.26	-0.0377358	-4.24	0.336	52.5
P08670	VIM	Vimentin	107.2	115	109.8	112.4	102.4	90.6	109.8	106.2	114	2.51895	0.0281073	0.0473588	570.96	0.0239631	282.1			-0.115915	-1369.62	-0.079566	-973.28			-0.191617	-1923.84	0.0375335	469.98
A0A0G2JPD3	HLA-A	HLA class I histocompatibility antigen, A alpha chain	0	0.4	1	0	0.2	0.2	0	0.4	1.4	4.4874	0.000810996	0	0	0	0			-0.666667	-0.06	0	0			-1.33333	-0.48	0.333333	0.48
A0A140T9B3	HLA-C	HLA class I histocompatibility antigen, C alpha chain	1	1.8	2.6	2	2	3.2	1.4	2.2	3.2	5.06003	0.000316257	0.666667	1.5	0.333333	0.48			0.105263	0.38	0.2	0.8			0.206897	1.74	0.206897	1.74
Q86WI1	PKHD1L1	Fibrocystin-L	0	0	0	0	0	0	0.4	0	0	2.58523	0.0247846	0	0	2	0.08			0	0	0	0			0	0	0	0
H7C2N1	PTMA	Prothymosin alpha (Fragment)	8	8.4	7.6	8.6	7.8	5.6	8	6	7.4			0.0722892	4.98	0	0	0.0722892	4.98	-0.0740741	-4.86	-0.333333	-17.28	0.26087	12.42	-0.30303	-13.2	-0.0266667	-1.5	-0.276923	-11.7
P62888	RPL30	60S ribosomal protein L30	2.8	3.2	4	2.8	2.8	1.2	2.4	2.4	3.4			0	0	-0.153846	-1.04	0.153846	1.04	-0.133333	-1.2	-0.285714	-2.24	0.153846	1.04	-1.07692	-7.28	-0.162162	-2.22	-0.956522	-5.06
B0QYS7	TFEB	Transcription factor EB	0	0.4	0	0	0	0	0	0	0	2.58523	0.0247846	0	0	0	0			-2	-0.08	-2	-0.08			0	0	0	0
Q07021	C1QBP	Complement component 1 Q subcomponent-binding protein, mitochondrial	0.2	1.2	0	0.8	0.4	1.8	0	0.4	1.8	2.53457	0.0272854	1.2	0.3	-2	-0.02			-1	-0.64	-1	-0.64			2	1.62	2	1.62
P09429	HMGB1	High mobility group protein B1	2	2	1.2	4	1.6	2	2	3.2	1.6			0.666667	6	0	0	0.666667	6	-0.222222	-0.72	0.461538	3.12	-0.666667	-3.84	0.5	1.28	0.285714	0.56	0.222222	0.72
Q9Y5Y4	PTGDR2	Prostaglandin D2 receptor 2	0	0	0	0	0	0	0	0.4	0	2.58523	0.0247846	0	0	0	0			0	0	2	0.08			0	0	0	0
P21980	TGM2	Protein-glutamine gamma-glutamyltransferase 2	2	2.8	4.6	4	3.4	4	2.6	2.8	3			0.666667	6	0.26087	1.38	0.424242	4.62	0.193548	1.86	0	0	0.193548	1.86	-0.139535	-2.58	-0.421053	-6.08	0.285714	3.5
Q15942	ZYX	Zyxin	8.4	10.4	8.4	10	9.6	11.6	8	7.4	8.2			0.173913	14.72	-0.0487805	-3.28	0.222222	18	-0.08	-8	-0.337079	-26.7	0.258824	18.7	0.32	32	-0.0240964	-1.66	0.343434	33.66
P04083	ANXA1	Annexin A1	7.6	9	13.2	15.2	11.4	12.4	10.2	12.2	12			0.666667	86.64	0.292135	23.14	0.393701	63.5	0.235294	24.48	0.301887	33.92	-0.0677966	-9.44	-0.0625	-10.24	-0.0952381	-15.12	0.0327869	4.88
P07900	HSP90AA1	Heat shock protein HSP 90-alpha	15	15.6	14	20.4	15.6	12.8	17.2	15	14.6			0.305085	95.58	0.136646	35.42	0.170213	60.16	0	0	-0.0392157	-9.18	0.0392157	9.18	-0.0895522	-16.08	0.041958	8.58	-0.131387	-24.66
E7EQR4	EZR	Ezrin	9	7.8	9.6	9.6	7.8	7.4	5.8	7	7.4			0.0645161	5.58	-0.432432	-23.68	0.493506	29.26	0	0	-0.108108	-5.92	0.108108	5.92	-0.258824	-18.7	-0.258824	-18.7	0	0
O75369	FLNB	Filamin-B	35.2	43.2	53.6	39.6	38.4	47.6	40.6	47.4	56.8	6.03667	6.96473e-05	0.117647	164.56	0.14248	204.66			-0.117647	-195.84	0.0927152	190.26			-0.118577	-303.6	0.057971	176.64
P04406	GAPDH	Glyceraldehyde-3-phosphate dehydrogenase	54.6	69.2	51.8	51.4	54.6	60	71.2	55.2	64.6	3.34733	0.00598907	-0.0603774	-169.6	0.263911	1044.14	-0.323002	-1213.74	-0.235864	-903.74	-0.22508	-870.8	-0.010929	-32.94	0.146691	458.38	0.219931	744.96	-0.0738363	-286.58
Q9UII4	HERC5	E3 ISG15--protein ligase HERC5	0	0	0	0	0	0	0.4	0	0	2.58523	0.0247846	0	0	2	0.08			0	0	0	0			0	0	0	0
P08238	HSP90AB1	Heat shock protein HSP 90-beta	19	16.4	19	26.4	20.6	16.8	21.2	21.2	18			0.325991	167.98	0.109453	44.22	0.218487	123.76	0.227027	77.7	0.255319	90.24	-0.0287081	-12.54	-0.122905	-39.38	-0.0540541	-18.5	-0.0689655	-20.88
Q16666	IFI16	Gamma-interferon-inducible protein 16	0.8	0	1.2	1.2	0	1.2	0	0.4	0	2.69571	0.0201084	0.4	0.4	-2	-0.32			0	0	2	0.08			0	0	-2	-0.72
P20591	MX1	Interferon-induced GTP-binding protein Mx1	0	0	0	0	0	5.8	0	0	0	24.3378	3.88088e-12	0	0	0	0	0	0	0	0	0	0	0	0	2	16.82	0	0	2	16.82
P49411	TUFM	Elongation factor Tu, mitochondrial	4.8	3	3.8	5	2.6	5.4	3.4	3.2	5.6			0.0408163	0.98	-0.341463	-5.74	0.380952	6.72	-0.142857	-1.12	0.0645161	0.62	-0.206897	-1.74	0.347826	7.36	0.382979	8.46	-0.0363636	-1.1
P55072	VCP	Transitional endoplasmic reticulum ATPase	12	6.6	6.2	11.8	9.4	6.6	8.4	4	6.2	2.52772	0.0276429	-0.0168067	-2.38	-0.352941	-36.72	0.336634	34.34	0.35	22.4	-0.490566	-13.78	0.80597	36.18	0.0625	2.56	0	0	0.0625	2.56
P13010	XRCC5	X-ray repair cross-complementing protein 5	2.8	4	4.4	4.4	4.2	2.2	3	4	3.4			0.444444	5.76	0.0689655	0.58	0.378378	5.18	0.0487805	0.82	0	0	0.0487805	0.82	-0.666667	-7.26	-0.25641	-3.9	-0.428571	-3.36
P12956	XRCC6	X-ray repair cross-complementing protein 6	5	7.4	5.2	7.2	5.4	7.2	8.2	4.8	6.4			0.360656	13.42	0.484848	21.12	-0.12987	-7.7	-0.3125	-12.8	-0.42623	-15.86	0.117647	3.06	0.322581	12.4	0.206897	6.96	0.117647	5.44
Q02952	AKAP12	A-kinase anchor protein 12	5	1.6	2	4.8	2.4	2.4	5.6	3	2	2.72196	0.0191362	-0.0408163	-0.98	0.113208	3.18			0.4	1.6	0.608696	3.22			0.181818	0.88	0	0
P09525	ANXA4	Annexin A4	0	0	0	0	0.2	0	0	0.6	0.4	2.70952	0.0195909	0	0	0	0			2	0.02	2	0.18			0	0	2	0.08
P27824	CANX	Calnexin	6.4	7.4	9.6	7	5.2	7	8	6.2	11.2	2.9069	0.0135187	0.0895522	4.02	0.222222	11.52	-0.133333	-7.5	-0.349206	-13.86	-0.176471	-8.16	-0.175439	-5.7	-0.313253	-21.58	0.153846	16.64	-0.461538	-38.22
E9PK25	CFL1	Cofilin-1	8.4	15	11.4	12.8	12	16.2	10.2	12.4	15.4	3.50569	0.00449294	0.415094	46.64	0.193548	16.74	0.226087	29.9	-0.222222	-40.5	-0.189781	-35.62	-0.0327869	-4.88	0.347826	66.24	0.298507	53.6	0.0506329	12.64
P09211	GSTP1	Glutathione S-transferase P	4	1.8	5.8	3.8	4.4	5.2	5	4.8	6.4			-0.0512821	-0.78	0.222222	4.5	-0.272727	-5.28	0.83871	8.06	0.909091	9.9	-0.0869565	-1.84	-0.109091	-3.3	0.0983607	3.66	-0.206897	-6.96
P22626	HNRNPA2B1	Heterogeneous nuclear ribonucleoproteins A2/B1	6.2	7.4	6.8	7.4	9.8	8.2	6.4	9.6	5.8	2.29588	0.042986	0.176471	8.16	0.031746	1.26	0.144928	6.9	0.27907	20.64	0.258824	18.7	0.0206186	1.94	0.186667	10.5	-0.15873	-6.3	0.342857	16.8
O14979	HNRNPDL	Heterogeneous nuclear ribonucleoprotein D-like	4.6	1.2	0.8	1.4	1.6	1.2	1.4	1	1.6	3.00593	0.0112375	-1.06667	-9.6	-1.06667	-9.6	0	0	0.285714	0.56	-0.181818	-0.22	0.461538	0.78	0.4	0.4	0.666667	0.96	-0.285714	-0.56
P05783	KRT18	Keratin, type I cytoskeletal 18	1.4	0.6	0	0	0.2	0.2	0.2	0.2	0	2.66673	0.0212403	-2	-0.98	-1.5	-0.96			-1	-0.16	-1	-0.16			2	0.02	0	0
P62937	PPIA	Peptidyl-prolyl cis-trans isomerase A	2.6	7.2	4.6	6.4	6	5.8	3.6	4.4	3.8	2.54919	0.0265386	0.844444	17.1	0.322581	3.1	0.56	14	-0.181818	-7.92	-0.482759	-16.24	0.307692	8.32	0.230769	6.24	-0.190476	-3.36	0.416667	9.6
P25787	PSMA2	Proteasome subunit alpha type-2	0.4	0	0	0.4	0.2	1.2	0.6	2	0	2.52749	0.0276547	0	0	0.4	0.1			2	0.02	2	2			2	0.72	0	0
Q8TAA3	PSMA8	Proteasome subunit alpha-type 8	0	0	0	0	0.8	0	0	0.6	0.4	2.4057	0.0348656	0	0	0	0			2	0.32	2	0.18			0	0	2	0.08
P43686	PSMC4	26S proteasome regulatory subunit 6B	6.4	4.4	2.2	2	0.8	0.8	2.4	0	1.4	6.56455	3.2181e-05	-1.04762	-18.48	-0.909091	-17.6	-0.181818	-0.88	-1.38462	-9.36	-2	-9.68	2	0.32	-0.933333	-2.1	-0.444444	-1.44	-0.545455	-0.66
A0A087WW66	PSMD1	26S proteasome non-ATPase regulatory subunit 1	1.2	0.4	0	0	0	0	0	0	0	2.41951	0.0339604	-2	-0.72	-2	-0.72			-2	-0.08	-2	-0.08			0	0	0	0
P38159	RBMX	RNA-binding motif protein, X chromosome	0.4	0.4	0.4	0.8	1.8	1.8	1.6	1.2	1.8	3.61863	0.00366693	0.666667	0.24	1.2	1.2			1.27273	1.54	1	0.64			1.27273	1.54	1.27273	1.54
P39023	RPL3	60S ribosomal protein L3	3.8	2.4	6	5.8	2.6	6.8	4.2	5.2	7.2	2.96728	0.0120767	0.416667	9.6	0.1	1.6	0.32	8	0.08	0.5	0.736842	10.64	-0.666667	-10.14	0.125	5.12	0.181818	7.92	-0.0571429	-2.8
P05388	RPLP0	60S acidic ribosomal protein P0	5.6	4.4	4.2	6.6	7	5.8	6	5.4	6.2	2.56163	0.025919	0.163934	6.1	0.0689655	2.32	0.0952381	3.78	0.45614	14.82	0.204082	4.9	0.258065	9.92	0.32	8	0.384615	10.4	-0.0666667	-2.4
Q99584	S100A13	Protein S100-A13	0	0	0.8	1.2	0	1.2	0.8	0	1.2	2.3035	0.0423655	2	0.72	2	0.32			0	0	0	0			0.4	0.4	0.4	0.4
P04179	SOD2	Superoxide dismutase [Mn], mitochondrial	0	0	2	0	0	5.6	0	0	4	14.831	3.40303e-09	0	0	0	0	0	0	0	0	0	0	0	0	0.947368	13.68	0.666667	6	0.333333	7.68
P31948	STIP1	Stress-induced-phosphoprotein 1	0	0	0.4	0	0	0	0	0	0	2.58523	0.0247846	0	0	0	0			0	0	0	0			-2	-0.08	-2	-0.08
P68363	TUBA1B	Tubulin alpha-1B chain	2.8	4.2	3	5.6	3.4	3.6	4	2.8	2.4			0.666667	11.76	0.352941	4.08	0.333333	7.68	-0.210526	-3.04	-0.4	-4.9	0.193548	1.86	0.181818	1.98	-0.222222	-1.62	0.4	3.6
P53396	ACLY	ATP-citrate synthase	0.4	0.8	1.6	2.8	0.4	0.8	2.8	4.8	1.2	2.68305	0.0205949	1.5	3.84	1.5	3.84	0	0	-0.666667	-0.24	1.42857	11.2	-1.69231	-11.44	-0.666667	-0.96	-0.285714	-0.56	-0.4	-0.4
P68032	ACTC1	Actin, alpha cardiac muscle 1	28.2	23	24.2	22.8	23.8	29.2	20.6	22.4	25.4			-0.211765	-137.7	-0.311475	-185.44	0.101382	47.74	0.034188	18.72	-0.0264317	-13.62	0.0606061	32.34	0.187266	133.5	0.0483871	29.76	0.139194	103.74
P12814	ACTN1	Alpha-actinin-1	14.4	14	10.4	12	15	14.8	12.8	11.2	16.6	2.80628	0.0163264	-0.181818	-31.68	-0.117647	-21.76	-0.0645161	-9.92	0.0689655	14.5	-0.222222	-35.28	0.290076	49.78	0.349206	55.44	0.459259	83.7	-0.11465	-28.26
O43707	ACTN4	Alpha-actinin-4	8.4	8	12.4	7.2	9.6	9.2	9	8	13.4			-0.153846	-9.36	0.0689655	5.22	-0.222222	-14.58	0.181818	14.08	0	0	0.181818	14.08	-0.296296	-34.56	0.0775194	12.9	-0.371681	-47.46
Q16186	ADRM1	Proteasomal ubiquitin receptor ADRM1	0.8	2	0.4	1.4	1.6	1	1.8	2	0.6	6.6563	2.82267e-05	0.545455	0.66	0.769231	1.3			-0.222222	-0.72	0	0			0.857143	0.42	0.4	0.1
Q09666	AHNAK	Neuroblast differentiation-associated protein AHNAK	18.2	18.6	25.6	19.6	27	18.8	24.4	19.4	21.8	2.61125	0.0235917	0.0740741	26.46	0.29108	132.06	-0.218182	-105.6	0.368421	191.52	0.0421053	15.2	0.327586	176.32	-0.306306	-150.96	-0.160338	-90.06	-0.147783	-60.9
P02768	ALB	Serum albumin	0.2	0	0.8	0.2	0.2	1.8	0.2	0	1.2	5.84366	9.30873e-05	0	0	0	0			2	0.02	0	0			0.769231	1.3	0.4	0.4
P04075	ALDOA	Fructose-bisphosphate aldolase A	7	6.4	7.4	7.4	5.4	9.8	5	5.4	5.6	2.64356	0.0221918	0.0555556	2.88	-0.333333	-12	0.387097	14.88	-0.169492	-5.9	-0.169492	-5.9	0	0	0.27907	20.64	-0.276923	-11.7	0.545455	32.34
P15144	ANPEP	Aminopeptidase N	2.8	1.8	2.4	2	2	3	0.8	2.4	4			-0.333333	-1.92	-1.11111	-3.6	0.857143	1.68	0.105263	0.38	0.285714	1.26	-0.181818	-0.88	0.222222	1.62	0.5	5.12	-0.285714	-3.5
P08758	ANXA5	Annexin A5	5.4	5	6.8	6	6.8	7.4	5.4	6	6			0.105263	3.42	0	0	0.105263	3.42	0.305085	10.62	0.181818	5.5	0.125	5.12	0.084507	4.26	-0.125	-5.12	0.208955	9.38
P08133	ANXA6	Annexin A6	0.2	1.2	5.6	4.4	3.2	3	3.6	4.4	4.2			1.82609	9.66	1.78947	6.46	0.2	3.2	0.909091	4.4	1.14286	8.96	-0.315789	-4.56	-0.604651	-11.18	-0.285714	-6.86	-0.333333	-4.32
F5H423	ARF3	Uncharacterized protein	1.6	2.2	3	2.4	4.6	4.6	3.4	3.6	3.8			0.4	1.6	0.72	4.5	-0.344828	-2.9	0.705882	8.16	0.482759	4.06	0.243902	4.1	0.421053	6.08	0.235294	2.72	0.190476	3.36
O15144	ARPC2	Actin-related protein 2/3 complex subunit 2	1.6	1	2.2	2	2.2	1.6	2.4	0	0.8	2.7676	0.0175587	0.222222	0.72	0.4	1.6			0.75	1.92	-2	-0.5			-0.315789	-1.14	-0.933333	-2.1
P20648	ATP4A	Potassium-transporting ATPase alpha chain 1	0.4	0	0	0	0	0	0	0	0.2	2.41951	0.0339604	-2	-0.08	-2	-0.08			0	0	0	0			0	0	2	0.02
P24539	ATP5PB	ATP synthase F(0) complex subunit B1, mitochondrial	2	4.4	3.8	2.8	3.6	2.4	2.4	2.8	3.2			0.333333	1.92	0.181818	0.88	0.153846	1.04	-0.2	-3.2	-0.444444	-5.76	0.25	2.56	-0.451613	-4.34	-0.171429	-2.1	-0.285714	-2.24
P80723	BASP1	Brain acid soluble protein 1	3.2	1.6	2.8	3.6	2.2	3.6	1.2	2.8	3.6			0.117647	1.36	-0.909091	-4.4	1	5.76	0.315789	1.14	0.545455	2.64	-0.24	-1.5	0.25	2.56	0.25	2.56	0	0
P51572	BCAP31	B-cell receptor-associated protein 31	3	1.4	0.6	2.8	3.6	1.6	2.8	1.8	0.4	2.81072	0.0161905	-0.0689655	-0.58	-0.0689655	-0.58	0	0	0.88	5.5	0.25	0.64	0.666667	4.86	0.909091	1.1	-0.4	-0.1	1.2	1.2
H0YCL7	BCO2	Beta,beta-carotene 9',10'-oxygenase (Fragment)	0	0.2	0.8	0	0	0	0	1.2	0.2	3.57955	0.00393334	0	0	0	0			-2	-0.02	1.42857	0.7			-2	-0.32	-1.2	-0.3
Q05682	CALD1	Caldesmon	3	3.2	3	2.4	1.2	1.2	3.8	0.8	1.4	3.06984	0.00997918	-0.222222	-1.62	0.235294	2.72			-0.909091	-4.4	-1.2	-4.8			-0.857143	-3.78	-0.727273	-3.52
Q01518	CAP1	Adenylyl cyclase-associated protein 1	5.6	2.6	6.4	4	6	5.8	4.4	2.8	2.6			-0.333333	-7.68	-0.24	-6	-0.0952381	-1.68	0.790698	14.62	0.0740741	0.54	0.727273	14.08	-0.0983607	-3.66	-0.844444	-17.1	0.761905	13.44
Q6NZI2	CAVIN1	Caveolae-associated protein 1	5.4	5	5.4	5.6	4.2	3	5	5.4	5.2			0.0363636	1.1	-0.0769231	-2.08	0.113208	3.18	-0.173913	-3.68	0.0769231	2.08	-0.25	-5.76	-0.571429	-10.08	-0.0377358	-1.06	-0.536585	-9.02
Q96A33	CCDC47	Coiled-coil domain-containing protein 47	0	0	0.4	1.2	0	0.8	0	0	0	2.70952	0.0195909	2	0.72	0	0			0	0	0	0			0.666667	0.24	-2	-0.08
P50991	CCT4	T-complex protein 1 subunit delta	0	0	0	0.4	0	0	0	0	0	2.58523	0.0247846	2	0.08	0	0			0	0	0	0			0	0	0	0
P40227	CCT6A	T-complex protein 1 subunit zeta	2.4	4.6	4.4	3.8	5.6	4	4.2	4.8	4.8			0.451613	4.34	0.545455	5.94	-0.1	-1.6	0.196078	5.1	0.0425532	0.94	0.153846	4.16	-0.0952381	-1.68	0.0869565	1.84	-0.181818	-3.52
Q99832	CCT7	T-complex protein 1 subunit eta	4.2	6.2	4.6	3.8	4	3.8	4.6	4	3.4			-0.1	-1.6	0.0909091	1.76	-0.190476	-3.36	-0.431373	-11.22	-0.431373	-11.22	0	0	-0.190476	-3.36	-0.3	-4.8	0.111111	1.44
Q07065	CKAP4	Cytoskeleton-associated protein 4	3.4	4.6	4.6	5.6	4.6	4.6	5.4	4.2	4.4			0.488889	9.9	0.454545	8.8	0.0363636	1.1	0	0	-0.0909091	-1.76	0.0909091	1.76	0	0	-0.0444444	-0.9	0.0444444	0.9
O00299	CLIC1	Chloride intracellular channel protein 1	3.2	2.4	2.4	2.8	2.4	3.2	1.2	1.2	6	2.89472	0.0138304	-0.133333	-1.2	-0.909091	-4.4	0.8	3.2	0	0	-0.666667	-2.16	0.666667	2.16	0.285714	2.24	0.857143	15.12	-0.608696	-12.88
A0A087WVQ6	CLTC	Clathrin heavy chain	5.4	5.2	10.2	5.2	6.6	7.2	6.4	8.8	10			-0.0377358	-1.06	0.169492	5.9	-0.206897	-6.96	0.237288	8.26	0.514286	25.2	-0.285714	-16.94	-0.344828	-26.1	-0.019802	-2.02	-0.325581	-24.08
Q9ULV4	CORO1C	Coronin-1C	2	4	0.8	1.8	1.6	0.4	2.6	1	1.6	3.10009	0.00943511	-0.105263	-0.38	0.26087	1.38	-0.363636	-1.76	-0.857143	-6.72	-1.2	-7.5	0.461538	0.78	-0.666667	-0.24	0.666667	0.96	-1.2	-1.2
Q16630	CPSF6	Cleavage and polyadenylation specificity factor subunit 6	0.2	0.4	0.2	0	1.2	0.2	0	0.4	0.2	3.57955	0.00393334	-2	-0.02	-2	-0.02			1	0.64	0	0			0	0	0	0
Q7Z407	CSMD3	CUB and sushi domain-containing protein 3	0	0	0	0	0	0	0	0	0.4	2.58523	0.0247846	0	0	0	0			0	0	0	0			0	0	2	0.08
P21291	CSRP1	Cysteine and glycine-rich protein 1	4.8	7	5.6	6	4.6	8.2	4.6	2.8	6			0.222222	6.48	-0.0425532	-0.94	0.264151	7.42	-0.413793	-13.92	-0.857143	-20.58	0.486486	6.66	0.376812	17.94	0.0689655	2.32	0.309859	15.62
P07858	CTSB	Cathepsin B	7.6	6.4	3.8	4.4	4	4	2.8	4	4	2.59347	0.0244004	-0.533333	-19.2	-0.923077	-24.96	0.444444	5.76	-0.461538	-12.48	-0.461538	-12.48	0	0	0.0512821	0.78	0.0512821	0.78	0	0
Q96PD2	DCBLD2	Discoidin, CUB and LCCL domain-containing protein 2	0.4	0	0	0	0	0	0	0	0	3.97727	0.00194409	-2	-0.08	-2	-0.08			0	0	0	0			0	0	0	0
Q9C005	DPY30	Protein dpy-30 homolog	0	0.4	0	0.4	0	0	0	0.2	1.2	2.27865	0.0444231	2	0.08	0	0			-2	-0.08	-0.666667	-0.06			0	0	2	0.72
A0A1C7CYX9	DPYSL2	Dihydropyrimidinase-related protein 2	3	3.6	6.2	4.4	6	5.8	5.6	6	5.6			0.378378	5.18	0.604651	11.18	-0.24	-6	0.5	11.52	0.5	11.52	0	0	-0.0666667	-2.4	-0.101695	-3.54	0.0350877	1.14
Q14204	DYNC1H1	Cytoplasmic dynein 1 heavy chain 1	1.2	2.2	0.8	2.6	3.8	0.4	1.4	0.4	1.2	2.85548	0.0148856	0.736842	2.66	0.153846	0.26	0.6	2.4	0.533333	4.8	-1.38462	-2.34	1.61905	7.14	-0.666667	-0.24	0.4	0.4	-1	-0.64
E9PRY8	EEF1D	Elongation factor 1-delta	2.6	2.2	2	2.2	3	4.2	2.2	3.6	4.6			-0.166667	-0.96	-0.166667	-0.96	0	0	0.307692	2.08	0.482759	4.06	-0.181818	-1.98	0.709677	6.82	0.787879	8.58	-0.0909091	-1.76
P13639	EEF2	Elongation factor 2	16.4	10	10.2	11	12	10.6	8	10	12.6	2.67119	0.0210618	-0.394161	-73.98	-0.688525	-102.48	0.315789	28.5	0.181818	22	0	0	0.181818	22	0.0384615	4.16	0.210526	27.36	-0.172414	-23.2
Q9NZN4	EHD2	EH domain-containing protein 2	0.8	1.8	4	1.2	1.6	3.6	0.6	3.4	4	3.22599	0.0074794	0.4	0.4	-0.285714	-0.14			-0.117647	-0.34	0.615385	4.16			-0.105263	-1.52	0	0
O00303	EIF3F	Eukaryotic translation initiation factor 3 subunit F	0	1.8	1.8	0	0.6	1.4	0	1.8	1.4	3.34559	0.00600815	0	0	0	0			-1	-1.44	0	0			-0.25	-0.64	-0.25	-0.64
P60842	EIF4A1	Eukaryotic initiation factor 4A-I	4.2	7.8	9.2	6.2	8.4	8.6	9.2	7.8	8	2.28412	0.0439617	0.384615	10.4	0.746269	33.5	-0.38961	-23.1	0.0740741	4.86	0	0	0.0740741	4.86	-0.0674157	-5.34	-0.139535	-10.32	0.0722892	4.98
Q15056	EIF4H	Eukaryotic translation initiation factor 4H	3.8	6	3.2	4.4	3.8	2.6	2.6	3.6	3.6			0.146341	2.46	-0.375	-3.84	0.514286	6.3	-0.44898	-10.78	-0.5	-11.52	0.0540541	0.74	-0.206897	-1.74	0.117647	1.36	-0.322581	-3.1
P13804	ETFA	Electron transfer flavoprotein subunit alpha, mitochondrial	6.4	6.8	6	5.2	6	6.8	4.8	4.4	4.4			-0.206897	-6.96	-0.285714	-8.96	0.08	2	-0.125	-5.12	-0.428571	-13.44	0.307692	8.32	0.125	5.12	-0.307692	-8.32	0.428571	13.44
H3BMH7	FBXO31	Uncharacterized protein (Fragment)	0	0	0	0	0	0	0	0.4	0	2.58523	0.0247846	0	0	0	0			0	0	2	0.08			0	0	0	0
Q9BVA6	FICD	Protein adenylyltransferase FICD	0.2	0	0	0	0	0	0	0	0.4	2.58523	0.0247846	-2	-0.02	-2	-0.02			0	0	0	0			0	0	2	0.08
Q9H2C0	GAN	Gigaxonin	0	0	0	0	0	0.4	0	0	0	2.58523	0.0247846	0	0	0	0			0	0	0	0			2	0.08	0	0
Q14697	GANAB	Neutral alpha-glucosidase AB	2.6	2.6	4.6	3	1.8	2.6	3.2	4.2	4.2			0.142857	1.12	0.206897	1.74	-0.0645161	-0.62	-0.363636	-1.76	0.470588	5.44	-0.8	-7.2	-0.555556	-7.2	-0.0909091	-1.76	-0.470588	-5.44
P50395	GDI2	Rab GDP dissociation inhibitor beta	16.2	13	12	11.8	13.4	12.6	13.2	13.6	14.6			-0.314286	-61.6	-0.204082	-44.1	-0.112	-17.5	0.030303	5.28	0.0451128	7.98	-0.0148148	-2.7	0.0487805	7.38	0.195489	34.58	-0.147059	-27.2
P04899	GNAI2	Guanine nucleotide-binding protein G(i) subunit alpha-2	2.4	2.8	2.4	0.8	0.4	1.6	0.4	1.6	3.2	2.98986	0.011579	-1	-2.56	-1.42857	-2.8			-1.5	-3.84	-0.545455	-2.64			-0.4	-1.6	0.285714	2.24
P16401	H1-5	Histone H1.5	5.6	5.2	6	7.2	6.4	5.6	5.6	4.4	5.2			0.25	10.24	0	0	0.25	10.24	0.206897	6.96	-0.166667	-3.84	0.37037	10.8	-0.0689655	-2.32	-0.142857	-4.48	0.0740741	2.16
Q6FI13	H2AC18	Histone H2A type 2-A	8.8	13.4	10.6	9.8	14.2	12	10	10.8	11	2.30322	0.0423888	0.107527	9.3	0.12766	11.28			0.057971	11.04	-0.214876	-31.46			0.123894	15.82	0.037037	4.32
P68431	H3C1	Histone H3.1	0.4	1.6	2.6	1.2	0.6	2	0.6	3.4	1.8			1	0.64	0.4	0.1	0.666667	0.54	-0.909091	-1.1	0.72	4.5	-1.4	-5.6	-0.26087	-1.38	-0.363636	-1.76	0.105263	0.38
P62805	H4C1	Histone H4	7	7.4	7.4	6.6	6.8	7	5.2	7.8	6.6			-0.0588235	-2.72	-0.295082	-10.98	0.237288	8.26	-0.084507	-4.26	0.0526316	3.04	-0.136986	-7.3	-0.0555556	-2.88	-0.114286	-5.6	0.0588235	2.72
A0A024R4E5	HDLBP	High density lipoprotein binding protein (Vigilin), isoform CRA_a	1.2	0.8	0.6	1.4	0.6	0.2	2.6	1.2	0.8	2.79371	0.0167167	0.153846	0.26	0.736842	2.66			-0.285714	-0.14	0.4	0.4			-1	-0.16	0.285714	0.14
P09651	HNRNPA1	Heterogeneous nuclear ribonucleoprotein A1	8.6	7.8	8	6.8	10.4	9.2	6.6	10.8	10.4			-0.233766	-13.86	-0.263158	-15.2	0.0298507	1.34	0.285714	23.66	0.322581	27.9	-0.0377358	-4.24	0.139535	10.32	0.26087	22.08	-0.122449	-11.76
P51991	HNRNPA3	Heterogeneous nuclear ribonucleoprotein A3	0.6	1.8	0.8	4.4	2.4	0.8	1.2	3.2	4.2	2.63893	0.0223873	1.52	9.5	0.666667	0.54	1.14286	8.96	0.285714	1.26	0.56	3.5	-0.285714	-2.24	0	0	1.36	8.5	-1.36	-8.5
D6RBZ0	HNRNPAB	Heterogeneous nuclear ribonucleoprotein A/B	4	2.2	1.2	2.4	1.6	1.2	1.8	1.2	1.6	2.25113	0.046818	-0.5	-5.12	-0.758621	-6.38	0.285714	1.26	-0.315789	-1.14	-0.588235	-1.7	0.285714	0.56	0	0	0.285714	0.56	-0.285714	-0.56
P07910	HNRNPC	Heterogeneous nuclear ribonucleoproteins C1/C2	1.2	3.4	1	2.4	1	1.4	1.6	1.2	0.6			0.666667	2.16	0.285714	0.56	0.4	1.6	-1.09091	-5.28	-0.956522	-5.06	-0.181818	-0.22	0.333333	0.48	-0.5	-0.32	0.8	0.8
Q14103	HNRNPD	Heterogeneous nuclear ribonucleoprotein D0	4	7.4	5.2	7	6	4.4	6	6.4	5.2			0.545455	16.5	0.4	10	0.153846	6.5	-0.208955	-9.38	-0.144928	-6.9	-0.0645161	-2.48	-0.166667	-3.84	0	0	-0.166667	-3.84
P14866	HNRNPL	Heterogeneous nuclear ribonucleoprotein L	5.4	5.8	7.2	5	8.6	6.4	5.2	5.2	4.6			-0.0769231	-2.08	-0.0377358	-1.06	-0.0392157	-1.02	0.388889	20.16	-0.109091	-3.3	0.492754	23.46	-0.117647	-5.44	-0.440678	-15.34	0.327273	9.9
P46940	IQGAP1	Ras GTPase-activating-like protein IQGAP1	5	3.4	7.8	5.8	6.2	4.8	6.8	6	7.2			0.148148	4.32	0.305085	10.62	-0.15873	-6.3	0.583333	13.44	0.553191	12.22	0.0327869	1.22	-0.47619	-18.9	-0.08	-4.5	-0.4	-14.4
O00505	KPNA3	Importin subunit alpha-4	0	0	0.8	0	0	1	0	1.6	0.4	3.09792	0.00947304	0	0	0	0			0	0	2	1.28			0.222222	0.18	-0.666667	-0.24
P13645	KRT10	Keratin, type I cytoskeletal 10	1.8	0.6	0	0	0.2	0.2	0.2	0.2	0	3.00199	0.0113203	-2	-1.62	-1.6	-1.6			-1	-0.16	-1	-0.16			2	0.02	0	0
Q86UP2	KTN1	Kinectin	3.4	2	1.2	1.2	0.4	2.6	0	0	0.4	4.08953	0.00159923	-0.956522	-5.06	-2	-5.78	2	0.72	-1.33333	-1.92	-2	-2	2	0.08	0.736842	2.66	-1	-0.64	1.46667	3.3
A0A0A0MQS9	LAMA4	Laminin subunit alpha-4	0	0	0	0	0.4	0	0	0	0	2.58523	0.0247846	0	0	0	0			2	0.08	0	0			0	0	0	0
P00338	LDHA	L-lactate dehydrogenase A chain	7	10.4	11.2	14.6	15	14.8	13.2	13	14			0.703704	82.08	0.613861	62.62	0.100719	19.46	0.362205	58.42	0.222222	30.42	0.142857	28	0.276923	46.8	0.222222	35.28	0.0555556	11.52
Q9BYZ2	LDHAL6B	L-lactate dehydrogenase A-like 6B	3.4	3	2.6	2	4.6	2.6	2.4	5.6	2.8			-0.518519	-3.78	-0.344828	-2.9	-0.181818	-0.88	0.421053	6.08	0.604651	11.18	-0.196078	-5.1	0	0	0.0740741	0.54	-0.0740741	-0.54
A0A5F9ZHM4	LDHB	L-lactate dehydrogenase	2.8	4.6	4.2	4	3	3.6	3.6	4.4	3.6			0.352941	4.08	0.25	2.56	0.105263	1.52	-0.421053	-6.08	-0.0444444	-0.9	-0.378378	-5.18	-0.153846	-2.34	-0.153846	-2.34	0	0
P02545	LMNA	Prelamin-A/C	20.8	17.8	16.6	16.8	13.8	17.8	13.6	12.6	17.6	2.77364	0.0173603	-0.212766	-75.2	-0.418605	-123.84	0.210526	48.64	-0.253165	-63.2	-0.342105	-79.04	0.0909091	15.84	0.0697674	20.64	0.0584795	17.1	0.0112994	3.54
E7EVA0	MAP4	Microtubule-associated protein	2.2	5.4	1.6	0.8	0.8	0.8	0.8	0	0.6	3.92818	0.00211847	-0.933333	-2.1	-0.933333	-2.1	0	0	-1.48387	-14.26	-2	-14.58	2	0.32	-0.666667	-0.96	-0.909091	-1.1	0.285714	0.14
P40926	MDH2	Malate dehydrogenase, mitochondrial	2	2	2.4	2.6	4	3.2	3.2	1.4	1.6			0.26087	1.38	0.461538	3.12	-0.206897	-1.74	0.666667	6	-0.352941	-1.02	0.962963	7.02	0.285714	2.24	-0.4	-1.6	0.666667	3.84
P10620	MGST1	Microsomal glutathione S-transferase 1	0	0	0.8	0	0	0	0	0	0	2.58523	0.0247846	0	0	0	0			0	0	0	0			-2	-0.32	-2	-0.32
P35749	MYH11	Myosin-11	6.8	7.4	5.8	6	5	9.2	9.8	4.8	7.6			-0.125	-5.12	0.361446	24.9	-0.481013	-30.02	-0.387097	-14.88	-0.42623	-15.86	0.0408163	0.98	0.453333	25.5	0.268657	12.06	0.190476	13.44
Q7Z406	MYH14	Myosin-14	2.2	1.6	2.4	1.2	2.6	1.4	1.6	2.4	3.8			-0.588235	-1.7	-0.315789	-1.14	-0.285714	-0.56	0.47619	2.1	0.4	1.6	0.08	0.5	-0.526316	-1.9	0.451613	4.34	-0.923077	-6.24
J3KND3	MYL6	Myosin light polypeptide 6	21.6	18	16.4	16.2	17.2	16.2	15.2	16.2	17.6			-0.285714	-102.06	-0.347826	-117.76	0.0636943	15.7	-0.0454545	-14.08	-0.105263	-30.78	0.0598802	16.7	-0.0122699	-3.26	0.0705882	20.4	-0.0828402	-23.66
E9PAV3	NACA	Nascent polypeptide-associated complex subunit alpha, muscle-specific form	1.6	2.6	3.8	3.2	2.8	2	3.2	3.6	3.2			0.666667	3.84	0.666667	3.84	0	0	0.0740741	0.54	0.322581	3.1	-0.25	-2.56	-0.62069	-5.22	-0.171429	-2.1	-0.461538	-3.12
P43490	NAMPT	Nicotinamide phosphoribosyltransferase	3.4	2.6	2.8	2.4	2.2	4.4	2.4	3.4	2.8			-0.344828	-2.9	-0.344828	-2.9	0	0	-0.166667	-0.96	0.266667	2.4	-0.428571	-3.36	0.444444	5.76	0	0	0.444444	5.76
Q32Q12	NME1-NME2	Nucleoside diphosphate kinase	10.8	5.2	9.6	10.4	8.8	9.6	11.8	8	8.6			-0.0377358	-4.24	0.0884956	11.3	-0.126126	-15.54	0.514286	25.2	0.424242	18.48	0.0952381	6.72	0	0	-0.10989	-9.1	0.10989	9.1
P06748	NPM1	Nucleophosmin	8.2	8	6.6	9.4	5.8	6.4	8	4.2	7			0.136364	10.56	-0.0246914	-1.62	0.16092	12.18	-0.318841	-15.18	-0.622951	-23.18	0.32	8	-0.0307692	-1.3	0.0588235	2.72	-0.0895522	-4.02
P61970	NUTF2	Nuclear transport factor 2	0.6	0.8	0.2	0	0.4	0.2	0.6	2	1.2	2.33839	0.0396384	-2	-0.18	0	0			-0.666667	-0.24	0.857143	1.68			0	0	1.42857	0.7
O43929	ORC4	Origin recognition complex subunit 4	0.4	0	0	0	0	0	0	0	0	3.97727	0.00194409	-2	-0.08	-2	-0.08			0	0	0	0			0	0	0	0
A6NKB5	PCNX2	Pecanex-like protein 2	0.4	0	0	0	0	0	0	0	0	3.97727	0.00194409	-2	-0.08	-2	-0.08			0	0	0	0			0	0	0	0
P13667	PDIA4	Protein disulfide-isomerase A4	7.2	5.2	6.2	6.4	5	6.6	4.4	5.6	7.4			-0.117647	-5.44	-0.482759	-16.24	0.37037	10.8	-0.0392157	-1.02	0.0740741	2.16	-0.113208	-3.18	0.0625	2.56	0.176471	8.16	-0.114286	-5.6
Q15084	PDIA6	Protein disulfide-isomerase A6	6.2	6.4	6.4	4.4	5.8	5.8	7.4	5.6	8.2			-0.339623	-9.54	0.176471	8.16	-0.508475	-17.7	-0.0983607	-3.66	-0.133333	-4.8	0.0350877	1.14	-0.0983607	-3.66	0.246575	13.14	-0.342857	-16.8
P07737	PFN1	Profilin-1	7	6	5.8	8	7.2	8.6	7.4	7.2	6.6			0.133333	7.5	0.0555556	2.88	0.0779221	4.62	0.181818	7.92	0.181818	7.92	0	0	0.388889	20.16	0.129032	4.96	0.263158	15.2
P52209	PGD	6-phosphogluconate dehydrogenase, decarboxylating	12.4	11	16.8	13.2	16.4	18.6	15.4	14	14.2	2.27593	0.0446542	0.0625	10.24	0.215827	41.7	-0.153846	-31.46	0.394161	73.98	0.24	37.5	0.157895	36.48	0.101695	31.86	-0.167742	-40.3	0.268293	72.16
O00625	PIR	Pirin	1.2	0.8	4	0.4	2	1.6	1.2	0.8	2.4	3.5464	0.00417495	-1	-0.64	0	0	-1	-0.64	0.857143	1.68	0	0	0.857143	1.68	-0.857143	-6.72	-0.5	-5.12	-0.4	-1.6
P02689	PMP2	Myelin P2 protein	0	0	0	0	0	0	0	0	2	9.6946	5.75187e-07	0	0	0	0			0	0	0	0			0	0	2	2
Q07864	POLE	DNA polymerase epsilon catalytic subunit A	0	0	0	0	0.2	0	0	0	0.6	3.57955	0.00393334	0	0	0	0			2	0.02	0	0			0	0	2	0.18
P23284	PPIB	Peptidyl-prolyl cis-trans isomerase B	2.6	2.6	4.8	2.2	2	4	4	5	3.2			-0.166667	-0.96	0.424242	4.62	-0.580645	-5.58	-0.26087	-1.38	0.631579	9.12	-0.857143	-10.5	-0.181818	-3.52	-0.4	-6.4	0.222222	2.88
O14974	PPP1R12A	Protein phosphatase 1 regulatory subunit 12A	0	0.4	0	0	0	0	0	0	0	2.58523	0.0247846	0	0	0	0			-2	-0.08	-2	-0.08			0	0	0	0
P30153	PPP2R1A	Serine/threonine-protein phosphatase 2A 65 kDa regulatory subunit A alpha isoform	1.2	1.6	2.8	3.6	2.8	1.6	2.2	3.6	2.4			1	5.76	0.588235	1.7	0.482759	4.06	0.545455	2.64	0.769231	5.2	-0.25	-2.56	-0.545455	-2.64	-0.153846	-1.04	-0.4	-1.6
Q06830	PRDX1	Peroxiredoxin-1	7.6	7.8	11.8	14	9.6	9	9.6	9.2	11.6	2.451	0.0319842	0.592593	69.12	0.232558	17.2	0.372881	51.92	0.206897	15.66	0.164706	11.9	0.0425532	3.76	-0.269231	-29.12	-0.017094	-2.34	-0.252427	-26.78
Q9BRX8	PRXL2A	Peroxiredoxin-like 2A	5.6	2	2.4	2.8	3.2	4	4	2.8	1.6	2.94095	0.0126849	-0.666667	-11.76	-0.333333	-7.68	-0.352941	-4.08	0.461538	3.12	0.333333	1.92	0.133333	1.2	0.5	5.12	-0.4	-1.6	0.857143	6.72
A0A0U1RRM4	PTBP1	Polypyrimidine tract-binding protein 1	6	5.4	6	6.4	5	6.2	5	6	4.2			0.0645161	2.48	-0.181818	-5.5	0.245614	7.98	-0.0769231	-2.08	0.105263	3.42	-0.181818	-5.5	0.0327869	1.22	-0.352941	-9.18	0.384615	10.4
P63244	RACK1	Receptor of activated protein C kinase 1	2.4	1.8	4	3.4	3.2	4.2	4.2	1.6	3.8			0.344828	2.9	0.545455	5.94	-0.210526	-3.04	0.56	3.5	-0.117647	-0.34	0.666667	3.84	0.0487805	0.82	-0.0512821	-0.78	0.1	1.6
J3KQE5	RAN	GTP-binding nuclear protein Ran (Fragment)	4.6	4.8	5	5.6	5.4	5.2	2.6	5	3.2			0.196078	5.1	-0.555556	-7.2	0.731707	12.3	0.117647	3.06	0.0408163	0.98	0.0769231	2.08	0.0392157	1.02	-0.439024	-7.38	0.47619	8.4
P98179	RBM3	RNA-binding protein 3	0	0.4	0.2	0.6	0.2	0	0.8	0.8	2	3.39184	0.0055226	2	0.18	2	0.32			-0.666667	-0.06	0.666667	0.24			-2	-0.02	1.63636	1.98
Q15293	RCN1	Reticulocalbin-1	1.8	0.2	2.2	2.8	1.8	3.4	2.4	2.2	4.2			0.434783	2.3	0.285714	1.26	0.153846	1.04	1.6	1.6	1.66667	2.4	-0.2	-0.8	0.428571	3.36	0.625	6.4	-0.210526	-3.04
Q9H426	RIMS4	Regulating synaptic membrane exocytosis protein 4	0.2	0	1	0	0.2	0	0.2	0	0.4	5.14805	0.000274641	-2	-0.02	0	0			2	0.02	0	0			-2	-0.5	-0.857143	-0.42
P27635	RPL10	60S ribosomal protein L10	3.4	3.6	3	3	3.8	1.6	4.2	5.2	3			-0.125	-1.28	0.210526	3.04	-0.333333	-4.32	0.0540541	0.74	0.363636	7.04	-0.311111	-6.3	-0.608696	-3.22	0	0	-0.608696	-3.22
P46777	RPL5	60S ribosomal protein L5	0.8	0.4	2.4	1.6	0.6	1.4	0	0.4	2.8	2.32251	0.0408566	0.666667	0.96	-2	-0.32			0.4	0.1	0	0			-0.526316	-1.9	0.153846	1.04
P32969	RPL9	60S ribosomal protein L9	6.8	4	0.4	1.6	1.4	2	2.4	0.4	1.2	9.6076	6.36183e-07	-1.2381	-21.84	-0.956522	-20.24	-0.4	-1.6	-0.962963	-7.02	-1.63636	-7.92	1.11111	0.9	1.33333	1.92	1	0.64	0.5	1.28
P05387	RPLP2	60S acidic ribosomal protein P2	6.4	4	6.4	6.2	4.8	5	4	4.4	5.6			-0.031746	-1.26	-0.461538	-12.48	0.431373	11.22	0.181818	3.52	0.0952381	1.68	0.0869565	1.84	-0.245614	-7.98	-0.133333	-4.8	-0.113208	-3.18
P04844	RPN2	Dolichyl-diphosphooligosaccharide--protein glycosyltransferase subunit 2	4.2	2	2.6	3.4	3.4	4.8	1.4	3.4	2.2			-0.210526	-3.04	-1	-7.84	0.833333	4.8	0.518519	3.78	0.518519	3.78	0	0	0.594595	8.14	-0.166667	-0.96	0.742857	9.1
K7ELC2	RPS15	40S ribosomal protein S15	0	0	0	1.6	0	0	0	0.2	0	2.44105	0.0325956	2	1.28	0	0			0	0	2	0.02			0	0	0	0
P62269	RPS18	40S ribosomal protein S18	2.6	3.4	2.2	1.8	3.2	2	3.8	3	3.8			-0.363636	-1.76	0.375	3.84	-0.714286	-5.6	-0.0606061	-0.66	-0.125	-1.28	0.0645161	0.62	-0.0952381	-0.42	0.533333	4.8	-0.62069	-5.22
P15880	RPS2	40S ribosomal protein S2	1.6	1.8	3.2	3.6	3.2	1.6	2.6	2	3.4			0.769231	5.2	0.47619	2.1	0.322581	3.1	0.56	3.5	0.105263	0.38	0.461538	3.12	-0.666667	-3.84	0.0606061	0.66	-0.72	-4.5
P62081	RPS7	40S ribosomal protein S7	3.4	1.8	1.8	4	1.6	2	2.2	2	1.2			0.162162	2.22	-0.428571	-3.36	0.580645	5.58	-0.117647	-0.34	0.105263	0.38	-0.222222	-0.72	0.105263	0.38	-0.4	-0.9	0.5	1.28
A0A0C4DG17	RPSA	40S ribosomal protein SA	3.6	5.8	3	5.2	7.4	1.4	6.4	4.8	5.4	3.20711	0.0077437	0.363636	7.04	0.56	14	-0.206897	-6.96	0.242424	10.56	-0.188679	-5.3	0.42623	15.86	-0.727273	-3.52	0.571429	10.08	-1.17647	-13.6
P31949	S100A11	Protein S100-A11	3.2	4.4	3.2	4	2.8	4.4	2	4	1.2			0.222222	2.88	-0.461538	-3.12	0.666667	6	-0.444444	-5.76	-0.0952381	-1.68	-0.352941	-4.08	0.315789	4.56	-0.909091	-4.4	1.14286	8.96
G5EA09	SDCBP	Syndecan binding protein (Syntenin), isoform CRA_a	0	0	0	0	0	0	0	0	0.4	2.58523	0.0247846	0	0	0	0			0	0	0	0			0	0	2	0.08
P50454	SERPINH1	Serpin H1	6.4	5.4	5.6	4.2	4	4.4	4.2	4.8	4.8			-0.415094	-11.66	-0.415094	-11.66	0	0	-0.297872	-6.58	-0.117647	-3.06	-0.181818	-3.52	-0.24	-6	-0.153846	-4.16	-0.0869565	-1.84
P23246	SFPQ	Splicing factor, proline- and glutamine-rich	4	4	4.2	4.2	4.6	3.6	3.8	3.2	4			0.0487805	0.82	-0.0512821	-0.78	0.1	1.6	0.139535	2.58	-0.222222	-2.88	0.358974	5.46	-0.153846	-2.34	-0.0487805	-0.82	-0.105263	-1.52
Q9H299	SH3BGRL3	SH3 domain-binding glutamic acid-rich-like protein 3	1.2	2.6	4.6	4.8	3.4	2	2.4	6.6	2.6			1.2	10.8	0.666667	2.16	0.666667	8.64	0.266667	2.4	0.869565	18.4	-0.64	-16	-0.787879	-8.58	-0.555556	-7.2	-0.26087	-1.38
P53007	SLC25A1	Tricarboxylate transport protein, mitochondrial	0.4	1.6	0.4	0.4	2.8	0.8	1.6	0.4	0.8	2.79095	0.0168039	0	0	1.2	1.2			0.545455	2.64	-1.2	-1.2			0.666667	0.24	0.666667	0.24
Q92504	SLC39A7	Zinc transporter SLC39A7	1.2	0	2.4	2	2.8	0.8	2.4	2.8	1.6	2.43409	0.0330303	0.5	1.28	0.666667	2.16			2	3.92	2	3.92			-1	-2.56	-0.4	-1.6
P00441	SOD1	Superoxide dismutase [Cu-Zn]	4	4	4.2	2.8	3.4	3.4	3.4	3.2	4.8			-0.352941	-4.08	-0.162162	-2.22	-0.193548	-1.86	-0.162162	-2.22	-0.222222	-2.88	0.0606061	0.66	-0.210526	-3.04	0.133333	2.7	-0.341463	-5.74
Q04837	SSBP1	Single-stranded DNA-binding protein, mitochondrial	0.4	0	0	0	0.8	0.8	0.2	0	0.4	3.01584	0.0110322	-2	-0.08	-0.666667	-0.06			2	0.32	0	0			2	0.32	2	0.08
A8MU27	SUMO3	Small ubiquitin-related modifier 3	2	1.2	2.4	3.2	2.4	2	3.2	3.6	3.2			0.461538	3.12	0.461538	3.12	0	0	0.666667	2.16	1	5.76	-0.4	-3.6	-0.181818	-0.88	0.285714	2.24	-0.461538	-3.12
P37802	TAGLN2	Transgelin-2	4.8	6.6	5.2	4.8	5.2	5	3.6	4	3.6			0	0	-0.285714	-5.04	0.285714	5.04	-0.237288	-8.26	-0.490566	-13.78	0.26087	5.52	-0.0392157	-1.02	-0.363636	-7.04	0.325581	6.02
Q9Y490	TLN1	Talin-1	8	10.2	7.8	7.4	9.4	7.2	7.8	7.6	5.2			-0.0779221	-4.62	-0.0253165	-1.58	-0.0526316	-3.04	-0.0816327	-7.84	-0.292135	-23.14	0.211765	15.3	-0.08	-4.5	-0.4	-16.9	0.322581	12.4
G3V1R8	TMBIM4	Protein lifeguard 4	0.4	0	0	0	0	0	0	0	0	3.97727	0.00194409	-2	-0.08	-2	-0.08			0	0	0	0			0	0	0	0
A0A087WWU8	TPM3	Tropomyosin alpha-3 chain	3.8	2.4	4.8	3.4	2.8	3.8	3.8	4.4	3.6			-0.111111	-1.44	0	0	-0.111111	-1.44	0.153846	1.04	0.588235	6.8	-0.444444	-5.76	-0.232558	-4.3	-0.285714	-5.04	0.0540541	0.74
P67936	TPM4	Tropomyosin alpha-4 chain	8	9.2	10	6.6	7.4	7.4	8.6	9.8	9.4			-0.191781	-10.22	0.0722892	4.98	-0.263158	-15.2	-0.216867	-14.94	0.0631579	5.7	-0.27907	-20.64	-0.298851	-22.62	-0.0618557	-5.82	-0.238095	-16.8
Q71U36	TUBA1A	Tubulin alpha-1A chain	2.4	1.4	4.6	3.6	7.6	2.4	4.2	3.4	5.2			0.4	3.6	0.545455	5.94	-0.153846	-2.34	1.37778	27.9	0.833333	4.8	0.763636	23.1	-0.628571	-7.7	0.122449	2.94	-0.736842	-10.64
F5H5D3	TUBA1C	Tubulin alpha chain	4.6	4.4	6.2	8	8.6	5.6	5.6	6	6.4			0.539683	21.42	0.196078	5.1	0.352941	16.32	0.646154	27.3	0.307692	8.32	0.356164	18.98	-0.101695	-3.54	0.031746	1.26	-0.133333	-4.8
Q13885	TUBB2A	Tubulin beta-2A chain	10.2	14	8.8	15	8.6	13.8	15.8	9.4	8.4			0.380952	60.48	0.430769	72.8	-0.0519481	-12.32	-0.477876	-61.02	-0.393162	-53.82	-0.0888889	-7.2	0.442478	56.5	-0.0465116	-3.44	0.486486	59.94
P04350	TUBB4A	Tubulin beta-4A chain	5.8	8	5.4	9.6	6.6	9	9.6	5.6	5.6			0.493506	29.26	0.493506	29.26	0	0	-0.191781	-10.22	-0.352941	-16.32	0.163934	6.1	0.5	25.92	0.0363636	1.1	0.465753	24.82
P68371	TUBB4B	Tubulin beta-4B chain	14.8	10.8	14.8	10.4	12.2	9.8	9.8	12.2	14			-0.349206	-55.44	-0.406504	-61.5	0.0594059	6.06	0.121739	16.1	0.121739	16.1	0	0	-0.406504	-61.5	-0.0555556	-11.52	-0.352941	-49.98
Q9BUF5	TUBB6	Tubulin beta-6 chain	4.4	4.2	5.6	6.6	6.8	6.2	6.6	5.4	7.6			0.4	12.1	0.4	12.1	0	0	0.472727	14.3	0.25	5.76	0.229508	8.54	0.101695	3.54	0.30303	13.2	-0.202899	-9.66
Q8NBS9	TXNDC5	Thioredoxin domain-containing protein 5	10.8	6.4	5.6	8.4	7.8	7	10.6	6.8	7.8	2.34871	0.038866	-0.25	-23.04	-0.0186916	-2.14	-0.231579	-20.9	0.197183	9.94	0.0606061	2.64	0.136986	7.3	0.222222	8.82	0.328358	14.74	-0.108108	-5.92
P22314	UBA1	Ubiquitin-like modifier-activating enzyme 1	4.6	4	4.4	2.4	2.4	1.8	3.6	1.2	2			-0.628571	-7.7	-0.243902	-4.1	-0.4	-3.6	-0.5	-5.12	-1.07692	-7.28	0.666667	2.16	-0.83871	-8.06	-0.75	-7.68	-0.105263	-0.38
D6R956	UCHL1	Ubiquitin carboxyl-terminal hydrolase	0	0.6	0	0	0.6	0	0.2	0.4	0	2.74341	0.0183774	0	0	2	0.02			0	0	-0.4	-0.1			0	0	0	0
P15374	UCHL3	Ubiquitin carboxyl-terminal hydrolase isozyme L3	0	0	0	0.4	0	0	0	0	0	2.58523	0.0247846	2	0.08	0	0			0	0	0	0			0	0	0	0
A0A1B0GUS7	UNC13B	Protein unc-13 homolog B	0	0	0	0.4	0	0	0	0	0	2.58523	0.0247846	2	0.08	0	0			0	0	0	0			0	0	0	0
P04275	VWF	von Willebrand factor	8	14.6	13.4	1.6	13	8.4	4.2	13	13.8	13.1899	1.50293e-08	-1.33333	-30.72	-0.622951	-23.18	-0.896552	-7.54	-0.115942	-22.08	-0.115942	-22.08	0	0	-0.458716	-54.5	0.0294118	5.44	-0.486486	-59.94
O75083	WDR1	WD repeat-containing protein 1	4.8	5.4	6.8	4.4	6	9.6	6.4	8.6	8.2			-0.0869565	-1.84	0.285714	8.96	-0.37037	-10.8	0.105263	3.42	0.457143	22.4	-0.356164	-18.98	0.341463	22.96	0.186667	10.5	0.157303	12.46
P67809	YBX1	Y-box-binding protein 1	4	5.6	6	5.2	5.2	5.6	3.6	5.2	6			0.26087	5.52	-0.105263	-1.52	0.363636	7.04	-0.0740741	-2.16	-0.0740741	-2.16	0	0	-0.0689655	-2.32	0	0	-0.0689655	-2.32
P31946	YWHAB	14-3-3 protein beta/alpha	2.8	2	4.4	8.4	3.8	5	3.4	6.6	4.6	2.27982	0.0443237	1	31.36	0.193548	1.86	0.847458	29.5	0.62069	5.22	1.06977	19.78	-0.538462	-14.56	0.12766	2.82	0.0444444	0.9	0.0833333	1.92
P62258	YWHAE	14-3-3 protein epsilon	3.6	4	5.2	3.2	4.6	7.8	5.8	4.6	5.4			-0.117647	-1.36	0.468085	10.34	-0.577778	-11.7	0.139535	2.58	0.139535	2.58	0	0	0.4	16.9	0.0377358	1.06	0.363636	15.84
P61981	YWHAG	14-3-3 protein gamma	2.2	4.6	2.6	6.2	6	7.4	2.8	5.4	7.8	2.41421	0.0343048	0.952381	16.8	0.24	1.5	0.755556	15.3	0.264151	7.42	0.16	4	0.105263	3.42	0.96	24	1	27.04	-0.0526316	-3.04
Q04917	YWHAH	14-3-3 protein eta	0.4	0	0.4	0.8	0.6	0.2	0	0	0	3.26136	0.00700901	0.666667	0.24	-2	-0.08			2	0.18	0	0			-0.666667	-0.06	-2	-0.08
P27348	YWHAQ	14-3-3 protein theta	4.6	5.6	6.4	3.2	4.8	6.4	6	4.2	5.4			-0.358974	-5.46	0.264151	7.42	-0.608696	-12.88	-0.153846	-4.16	-0.285714	-6.86	0.133333	2.7	0	0	-0.169492	-5.9	0.169492	5.9
