# Supplementary material for: SARS-CoV-2 Infection Remodels the Phenotype and Promotes Angiogenesis of Primary Human Lung Endothelial Cells
Source: Microorganisms. 2021 Jul 3;9(7):1438. doi: 10.3390/microorganisms9071438 (PMC8305478; doi:10.3390/microorganisms9071438)
Supplement: Supplementary file 1 [file microorganisms-09-01438-s001.zip › TableS3.xls]

## Sheet: Table S3
Table S3 - Extracted up-/down-regulated proteins in the infected cells, compared to both mock and UV-infected cells as controls, at day 1 to 3; ((+)) correspond to high confident differencial expressed proteins (DEPs)
Gene Name	p-value	F Ratio	Day 1	Day 2	Day3
PECAM1			up	down(+)	down
PRDX1	0.032	2.5	up		down
XRCC5			up(+)		down
GNAI2	0.012	3		down(+)	down
RPSA	0.0077	3.2		up	down
ANXA6					down
PSMC4	3.2e-05	6.6			down
HSPB1					down
ATP5PB					down
VIM	0.028	2.5			down
TPM4					down
ACTN4					down
CORO1C	0.0094	3.1			down
EIF4H					down
CLTC					down
ACLY	0.021	2.7			down
RIMS4	0.00027	5.1	down(+)	up(+)	down(+)
VWF	1.5e-08	13.2	down(+)		down(+)
DYNC1H1	0.015	2.9	up(+)		down(+)
RBM3	0.0055	3.4		down	down(+)
HLA-A	0.00081	4.5		down(+)	down(+)
BCO2	0.0039	3.6		down(+)	down(+)
TUBA1A				up	down(+)
RPS2				up(+)	down(+)
RPL5	0.041	2.3		up(+)	down(+)
GANAB					down(+)
SLC39A7	0.033	2.4			down(+)
TUBB4B					down(+)
NACA					down(+)
RPL30					down(+)
PPP2R1A					down(+)
PTMA					down(+)
CAVIN1					down(+)
CANX	0.014	2.9		down(+)	down(+)
HDLBP	0.017	2.8			down(+)
IQGAP1					down(+)
PPIA	0.027	2.5	up(+)		up
ADRM1	2.8e-05	6.7			up
HNRNPA2B1	0.043	2.3			up
ALDOA	0.022	2.6			up
PGK1			down(+)		up(+)
BCAP31	0.016	2.8		up(+)	up(+)
ALB	9.3e-05	5.8		up(+)	up(+)
WARS1	29.2583	2.62099e-13		up(+)	up(+)
YWHAH	0.007	3.3		up(+)	up(+)
ITGA5	0.046	2.3			up(+)
TUBB2A					up(+)
PSMA2	0.028	2.5			up(+)
TUBB4A					up(+)
MX1	3.9e-12	24.3			up(+)
VEGFD	0.025	2.6			up(+)
GAN	0.025	2.6			up(+)
NAMPT					up(+)
PFN1					up(+)
HSP90B1					up(+)
CSRP1					up(+)
ZYX					up(+)
YWHAE					up(+)
RPN2					up(+)
PRXL2A	2.94095	0.0126849	down
H1-3			down
UBA1			down
RTN4			down
YWHAQ			down
NUTF2	0.04	2.3	down(+)	down
PIR	0.0042	3.5	down(+)	up(+)
KRT18	0.021	2.7	down(+)
PDIA6			down(+)
TUBA1C			up	up
CFL1	0.0045	3.5	up
SH3BGRL3			up
HSP90AA1			up
ANXA1			up
HNRNPC			up
TGM2			up
C1QBP	0.027	2.5	up
EHD2	0.0075	3.2	up
COPE			up
SSBP1	0.011	3	up(+)	down
DPY30	0.044	2.3	up(+)	down(+)
HSP90AB1			up(+)
HNRNPA3	0.022	2.6	up(+)
RPL3	0.012	3	up(+)
YWHAG	0.034	2.4	up(+)
YWHAB	0.044	2.3	up(+)
CTNNB1	0.027	2.5	up(+)
CCT4	0.025	2.6	up(+)
UCHL3	0.025	2.6	up(+)
UNC13B	0.025	2.6	up(+)
RPS15	0.033	2.4	up(+)
CCDC47	0.02	2.7	up(+)
HMGB1			up(+)
HNRNPDL	0.011	3		down
EIF3F	0.006	3.3		down(+)
S100A11				down(+)
RPLP0	0.026	2.6		up
H1-5				up
RACK1				up(+)
CLIC4	0.02	2.7		up(+)
LAMA4	0.025	2.6		up(+)
CAP1				up(+)
LDHB				up(+)
HNRNPL				up(+)
MDH2				up(+)
